# Supplementary material
Source: HighWire-hosted journal article supplement (https://rmdopen.bmj.com/content/11/1/e004963)
Supplement: inline-supplementary-material-1 [file inline-supplementary-material-1.pdf]

Treatments for hand osteoarthritis: A systematic review: 2024 update.

Online Supplementary Material

| Table of contents                                                                  | Page |
|------------------------------------------------------------------------------------|------|
| 1. Literature search strategy                                                      | 2    |
| 2. Flow chart                                                                      | 6    |
| 3. Overview of new included studies and previous studies included in meta-analyses | 7    |
| 3.1 Non-pharmacological interventions                                              | 7    |
| 3.2 Pharmacological interventions                                                  | 7    |
| 3.3 Pharmacological and non-pharmacological interventions                          | 8    |
| 3.4 Surgical interventions                                                         | 8    |
| 4. Characteristics and risk of bias of new included studies                        | 10   |
| 5. Characteristics of previous studies included in the meta-analyses               | 26   |
| 6. Grading of evidence                                                             | 37   |
| 7. Forest plots                                                                    | 53   |
| 8. List of abbreviations                                                           | 90   |
| 9. Reference list                                                                  | 92   |

## 1. LITERATURE SEARCH STRATEGY

### PubMed

("Hand"[mesh] OR "hand"[tiab] OR "hands"[tiab] OR "Hand Joints"[mesh] OR "hand joint"[tiab] OR "hand joints"[tiab] OR "intermetacarpal joint"[tiab] OR "intermetacarpal joints"[tiab] OR "finger"[tiab] OR "fingers"[tiab] OR "Finger Joint"[mesh] OR "Carpal Joints"[mesh] OR "Carpal Joint"[tiab] OR "Carpal Joints"[tiab] OR "Carpometacarpal Joint"[tiab] OR "Carpometacarpal Joints"[tiab] OR "Finger Joint"[tiab] OR "Finger Joints"[tiab] OR "Metacarpophalangeal Joint"[tiab] OR "Metacarpophalangeal Joints"[tiab] OR "thumb"[tiab] OR "thumbs"[tiab] OR "metacarpus"[tiab] OR "trapeziometacarpal"[tiab] OR "first metacarpal-carpal"[tiab] OR "carpometacarpal"[tiab] OR "interphalangeal"[tiab] OR "distal interphalangeal"[tiab] OR "proximal interphalangeal"[tiab] OR Intermetacarp\*[tiab] OR Interphalang\*[tiab] OR Intercarp\*[tiab] OR Carpometacarp\*[tiab] OR Metacarpophalang\*[tiab] OR Metacarp\*[tiab] OR scaphotrapezotrapezoid\*[tiab]) AND ("Osteoarthritis"[mesh] OR "Osteoarthritis"[tiab] OR "Osteo-arthritis"[tiab] OR osteoarthr\*[tiab] OR osteo-arthr\*[tiab] OR "osteoarthrosis"[tiab] OR "osteoarthroses"[tiab] OR "degenerative arthritis"[tiab] OR rhizarthros\*[tiab] OR "arthrosis"[tiab] OR "arthroses"[tiab] OR Heberden[tiab] OR Bouchard[tiab]) AND ("Treatment Outcome"[Mesh] OR "Treatment"[tw] OR "Treatments"[tw] OR "treated"[tw] OR "Therapeutics"[Mesh] OR "Therapeutics"[tw] OR "Therapeutic"[tw] OR "Therapy"[tw] OR "Therapies"[tw] OR "therapy" [Subheading] OR "Pharmaceutical Preparations"[Mesh] OR "drug"[tw] OR "drugs"[tw] OR "Exercise Therapy"[Mesh] OR "Exercise Therapy"[tw] OR "exercise"[tw] OR "Rehabilitation"[Mesh:NoExp] OR "Rehabilitation"[tw] OR "Health Education"[Mesh] OR "education"[tw] OR "Self Care"[Mesh] OR "Behavior Therapy"[Mesh] OR "Splints"[Mesh] OR "Orthotic Devices"[Mesh] OR "Self-Help Devices"[Mesh] OR splint\*[tw] OR orthos\*[tw] OR "assistive device"[tw] OR "Hyperthermia, Induced"[Mesh] OR "heat application"[tw] OR "Administration, Topical"[Mesh] OR "Balneology"[Mesh] OR "balneotherapy"[tw] OR "Acetaminophen"[Mesh] OR "acetaminophen"[tw] OR "paracetamol"[tw] OR "Glucosamine"[Mesh] OR "glucosamine"[tw] OR "Chondroitin"[Mesh] OR "chondroitin"[tw] OR "chondroitin sulfate"[tw] OR "chondroitin sulphate"[tw] OR "avocado-soybean unsaponifiables"[tw] OR "avocado-soybean unsaponifiables"[tw] OR "ASU"[tw] OR "diacetylrhein" [Supplementary Concept] OR "diacerhein"[tw] OR "diacerein"[tw] OR "Dietary Supplements"[Mesh] OR "Salicylates"[Mesh] OR salicylate\*[tw] OR "Capsaicin"[Mesh] OR "Capsaicin"[tw] OR "Antirheumatic Agents"[Mesh] OR "Antirheumatic"[tw] OR "Hydroxychloroquine"[Mesh] OR "Methotrexate"[Mesh] OR "Sulfasalazine"[Mesh] OR "Hydroxychloroquine"[tw] OR "Methotrexate"[tw] OR "Sulfasalazine"[tw] OR "Analgesics"[Mesh] OR "Analgesics" [Pharmacological Action] OR "Analgesics, Opioid"[Mesh] OR "Analgesics, Opioid" [Pharmacological Action] OR "Tramadol"[Mesh] OR "Analgesics, Non-Narcotic"[Mesh] OR "Analgesics, Short-Acting"[Mesh] OR "Analgesics, Non-Narcotic" [Pharmacological Action] OR Analgesic\*[tw] OR "Tramadol"[tw] OR "opioid"[tw] OR "opioids"[tw] OR "Anti-Inflammatory Agents, Non-Steroidal"[Mesh] OR "Nonsteroidal Antiinflammatory"[tw] OR "Nonsteroidal Anti-inflammatory"[tw] OR "Non-steroidal Antiinflammatory"[tw] OR "Non-steroidal Anti-inflammatory"[tw] OR NSAID\*[tw] OR "Diphosphonates"[Mesh] OR "bisphosphonates"[tw] OR "bisphosphonate"[tw] OR "Intra-Articular Injection"[tw] OR "Intraarticular Injections"[tw] OR "Intraarticular Injection"[tw] OR "Injections"[mesh] OR "injection"[tw] OR "injections"[tw] OR inject\*[tw] OR Intraarticular\*[tw] OR Intra-articular\*[tw] OR "Viscosupplementation"[Mesh] OR "viscosupplementation"[tw] OR viscosupplement\*[tw] OR "Hyaluronic Acid"[Mesh] OR "Hyaluronic Acid"[tw] OR "Hyaluronic Acids"[tw] OR "Hyaluronate"[tw] OR "Hyaluronan"[tw] OR

corticosteroid\*[tw] OR "Adrenal Cortex Hormones"[Mesh] OR "Adrenal Cortex Hormones"[Pharmacological Action] OR "Methylprednisolone"[mesh] OR "Prednisolone"[mesh] OR "Prednisone"[mesh] OR "Glucocorticoids"[tw] OR "Glucocorticoid"[tw] OR glucocorticoid\*[tw] OR "Biological Therapy"[Mesh] OR "infliximab"[tw] OR "adalimumab"[tw] OR "etanercept"[tw] OR "remicade"[tw] OR "humira"[tw] OR "enbrel"[tw] OR "infliximab"[tw] OR "antibodies, monoclonal"[Mesh] OR "Monokines"[Mesh] OR "Receptors, Interleukin-1"[Mesh] OR "anakinra"[tw] OR "kineret"[tw] OR "Arthrodesis"[Mesh] OR "Arthroplasty"[Mesh] OR "Arthrodesis"[tw] OR "Arthroplasty"[tw] OR "surgery"[tw] OR "surgical"[tw] OR "replacement"[tw] OR trapeziectom\*[tw] OR "non-pharmacological"[tw] OR "Self Care"[Mesh] OR "self-management"[tw] OR "assistive devices"[tw] OR "Ultrasonography/therapeutic use"[Mesh] OR "therapeutic ultrasound" OR "pharmacological intervention"[tw] OR "pharmacological interventions"[tw] OR "diet therapy"[tw] OR "Diet Therapy"[Mesh] OR "diet therapy"[Subheading] OR "DMARDs"[tw] OR DMARD\*[tw] OR "anti-IL-1"[tw] OR "anti-IL1"[tw] OR "anti-Interleukin-1"[tw] OR "anti-Interleukin1"[tw] OR "Osteotomy"[Mesh] OR "osteotomy"[tw] OR osteotom\*[tw]) NOT ("Animals"[mesh] NOT "Humans"[mesh]))

## Embase

(exp "Hand"/ OR "hand".ti OR "hands".ti OR exp "Hand Joint"/ OR "hand joint".ti OR "hand joints".ti OR "intermetacarpal joint".ti OR "intermetacarpal joints".ti OR "finger".ti OR "fingers".ti OR exp "Finger Joint"/ OR exp Carpal Joint/ OR "Carpal Joint".ti OR "Carpal Joints".ti OR "Carpometacarpal Joint".ti OR "Carpometacarpal Joints".ti OR "Finger Joint".ti OR "Finger Joints".ti OR "Metacarpophalangeal Joint".ti OR "Metacarpophalangeal Joints".ti OR exp thumb/ OR "thumb".ti OR "thumbs".ti OR exp metacarpal bone/ OR "metacarpus".ti OR "trapeziometacarpal".ti OR "first metacarpal-carpal".ti OR "carpometacarpal".ti OR "interphalangeal".ti OR "distal interphalangeal".ti OR "proximal interphalangeal".ti OR Intermetacarp\*.ti OR Interphalang\*.ti OR Intercarp\*.ti OR Carpometacarp\*.ti OR Metacarpophalang\*.ti OR Metacarp\*.ti OR scaphotrapeziotrapezoid\*.ti) AND (exp Osteoarthritis/ OR "Osteoarthritis".ti OR osteoarthr\*.ti OR "osteoarthrosis".ti OR "osteoarthroses".ti OR "degenerative arthritis".ti OR rhizarthros\*.ti OR "arthrosis".ti OR "arthroses".ti OR Heberden.ti OR Bouchard.ti) AND (exp "Treatment Outcome"/ OR "Treatment".mp OR "Treatments".mp OR "treated".mp OR "Therapeutics".mp OR "Therapeutic".mp OR "Therapy".mp OR "Therapies".mp OR exp therapy/ OR "drug".mp OR "drugs".mp OR medicament\*.mp OR exp kinesiotherapy/ OR kinesiotherapy.mp OR "Exercise Therapy".mp OR Rehabilitation/ OR "Rehabilitation".mp OR exp "Antirheumatic Agent"/ OR "Antirheumatic".mp OR exp analgesic agent/ OR Analgesic\*.mp OR exp nonsteroid antiinflammatory agent/ OR "Nonsteroidal Antiinflammatory".mp OR "Nonsteroidal Anti-inflammatory".mp OR "Non-steroidal Antiinflammatory".mp OR "Non-steroidal Anti-inflammatory".mp OR NSAID\*.mp OR exp Arthrodesis/ OR exp Arthroplasty/ OR "Arthrodesis".mp OR "Arthroplasty".mp OR "surgery".mp OR "surgical".mp OR "replacement".mp OR trapeziectom\*.mp OR "exercise".mp OR "Health Education"/ OR "education".mp OR exp "Self Care"/ OR exp "Behavior Therapy"/ OR exp "Splint"/ OR exp "Orthosis"/ OR "Self-Help Device"/ OR splint\*.mp OR orthos\*.mp OR "assistive device".mp OR exp "Thermotherapy"/ OR "heat application".mp OR exp "Topical Drug Administration"/ OR exp "balneotherapy"/ OR "balneotherapy".mp OR "Paracetamol"/ OR "acetaminophen".mp OR "paracetamol".mp OR exp "Glucosamine"/ OR "glucosamine".mp OR "Chondroitin"/ OR

"chondroitin".mp OR "chondroitin sulfate".mp OR "chondroitin sulphate".mp OR "avocado-soybean unsaponifiables".mp OR "avocado-soybean unsaponifiables".mp OR "ASU".mp OR "diacerein"/ OR "diacerhein".mp OR "diacerein".mp OR "Dietary Supplement"/ OR exp "salicylic acid derivative"/ OR salicylate\*.mp OR "Capsaicin"/ OR "Capsaicin".mp OR "Hydroxychloroquine"/ OR "Methotrexate"/ OR "Sulfasalazine"/ OR "Hydroxychloroquine".mp OR "Methotrexate".mp OR "Sulfasalazine".mp OR "Tramadol"/ OR "Tramadol".mp OR "opioid".mp OR "opioids".mp OR exp "bisphosphonic acid derivative"/ OR "bisphosphonates".mp OR "bisphosphonate".mp OR "Intra-Articular Injection".mp OR "Intraarticular Injections".mp OR "Intraarticular Injection".mp OR exp "Injection"/ OR "injection".mp OR "injections".mp OR inject\*.mp OR Intraarticular\*.mp OR Intra-articular\*.mp OR "Viscosupplementation"/ OR "viscosupplementation".mp OR viscosupplement\*.mp OR "Hyaluronic Acid"/ OR "Hyaluronic Acid".mp OR "Hyaluronic Acids".mp OR "Hyaluronate".mp OR "Hyaluronan".mp OR corticosteroid\*.mp OR exp "Corticosteroid"/ OR "Methylprednisolone"/ OR "Prednisolone"/ OR exp "Prednisone"/ OR "Glucocorticoids".mp OR "Glucocorticoid".mp OR glucocorticoid\*.mp OR exp "Biological Therapy"/ OR "infliximab".mp OR "adalimumab".mp OR "etanercept".mp OR "remicade".mp OR "humira".mp OR "enbrel".mp OR "infliximab".mp OR exp "monoclonal antibody"/ OR exp "Monokine"/ OR "Interleukin 1 receptor"/ OR "anakinra".mp OR "kineret".mp OR "non-pharmacological".mp OR "self-management".mp OR "assistive devices".mp OR exp "Ultrasound Therapy"/ OR "therapeutic ultrasound" OR "pharmacological intervention".mp OR "pharmacological interventions".mp OR "diet therapy".mp OR exp "Diet Therapy"/ OR "DMARDs".mp OR DMARD\*.mp OR "anti-IL-1".mp OR "anti-IL1".mp OR "anti-Interleukin-1".mp OR "anti-Interleukin1".mp OR exp "Osteotomy"/ OR "osteotomy".mp OR osteotom\*.mp) AND (exp human/ OR human.mp.)

## Cochrane CENTRAL

("Hand" OR "hands" OR "Hand Joints" OR "hand joint" OR "intermetacarpal joint" OR "intermetacarpal joints" OR "finger" OR "fingers" OR "Finger Joint" OR "Carpal Joints" OR "Carpal Joint" OR "Carpal Joints" OR "Carpometacarpal Joint" OR "Carpometacarpal Joints" OR "Finger Joints" OR "Metacarpophalangeal Joint" OR "Metacarpophalangeal Joints" OR "thumb" OR "thumbs" OR "metacarpus" OR "trapeziometacarpal" OR "first metacarpal-carpal" OR "carpometacarpal" OR "interphalangeal" OR "distal interphalangeal" OR "proximal interphalangeal" OR Intermetacarp\* OR Interphalang\* OR Intercarp\* OR Carpometacarp\* OR Metacarpophalang\* OR Metacarp\* OR scaphotrapeziotrapezoid\*) AND ("Osteoarthritis" OR osteoarthr\* OR "osteoarthrosis" OR "osteoarthroses" OR "degenerative arthritis" OR rhizarthros\* OR "arthrosis" OR "arthroses" OR Heberden OR Bouchard) AND ("Treatment Outcome" OR "Treatment" OR "Treatments" OR "treated" OR "Therapeutics" OR "Therapeutic" OR "Therapy" OR "Therapies" OR therapy OR "drug" OR "drugs" OR medicament\* OR kinesiotherapy OR kinesiotherapy OR "Exercise Therapy" OR Rehabilitation OR "Rehabilitation" OR "Antirheumatic Agent" OR "Antirheumatic" OR analgesic agent OR Analgesic\* OR nonsteroid antiinflammatory agent OR "Nonsteroidal Antiinflammatory" OR "Nonsteroidal Anti-inflammatory" OR "Non-steroidal Antiinflammatory" OR "Non-steroidal Anti-inflammatory" OR NSAID\* OR Arthrodesis OR Arthroplasty OR "Arthrodesis" OR "Arthroplasty" OR "surgery" OR "surgical" OR "replacement" OR trapeziectom\* OR "exercise" OR "Health Education" OR "education" OR "Self Care" OR "Behavior Therapy" OR "Splint" OR "Orthosis" OR "Self-Help Device" OR splint\* OR orthos\* OR "assistive device" OR "Thermotherapy" OR "heat application" OR "Topical Drug"

Administration" OR "balneotherapy" OR "balneotherapy" OR "Paracetamol" OR "acetaminophen" OR "paracetamol" OR "Glucosamine" OR "glucosamine" OR "Chondroitin" OR "chondroitin" OR "chondroitin sulfate" OR "chondroitin sulphate" OR "avocado-soyabean unsaponifiables" OR "avocado-soybean unsaponifiables" OR "ASU" OR "diacerein" OR "diacerhein" OR "diacerein" OR "Dietary Supplement" OR "salicylic acid derivative " OR salicylate\* OR "Capsaicin" OR "Capsaicin" OR "Hydroxychloroquine" OR "Methotrexate" OR "Sulfasalazine" OR "Hydroxychloroquine" OR "Methotrexate" OR "Sulfasalazine" OR "Tramadol" OR "Tramadol" OR "opioid" OR "opioids" OR "bisphosphonic acid derivative" OR "bisphosphonates" OR "bisphosphonate" OR "Intra-Articular Injection" OR "Intraarticular Injections" OR "Intraarticular Injection" OR "Injection" OR "injection" OR "injections" OR inject\* OR Intraarticular\* OR Intra-articular\* OR "Viscosupplementation" OR "viscosupplementation" OR viscosupplement\* OR "Hyaluronic Acid" OR "Hyaluronic Acid" OR "Hyaluronic Acids" OR "Hyaluronate" OR "Hyaluronan" OR corticosteroid\* OR "Corticosteroid" OR "Methylprednisolone" OR "Prednisolone" OR "Prednisone" OR "Glucocorticoids" OR "Glucocorticoid" OR glucocorticoid\* OR "Biological Therapy" OR "infliximab" OR "adalimumab" OR "etanercept" OR "remicade" OR "humira" OR "enbrel" OR "infliximab" OR "monoclonal antibody" OR "Monokine" OR "Interleukin 1 receptor" OR "anakinra" OR "kineret" OR "non-pharmacological" OR "self-management" OR "assistive devices" OR "Ultrasound Therapy" OR "therapeutic ultrasound" OR "pharmacological intervention" OR "pharmacological interventions" OR "diet therapy" OR "Diet Therapy" OR "DMARDs" OR DMARD\* OR "anti-IL-1" OR "anti-IL1" OR "anti-Interleukin-1" OR "anti-Interleukin1" OR "Osteotomy" OR "osteotomy" OR osteotom\*))

2. FLOW CHART

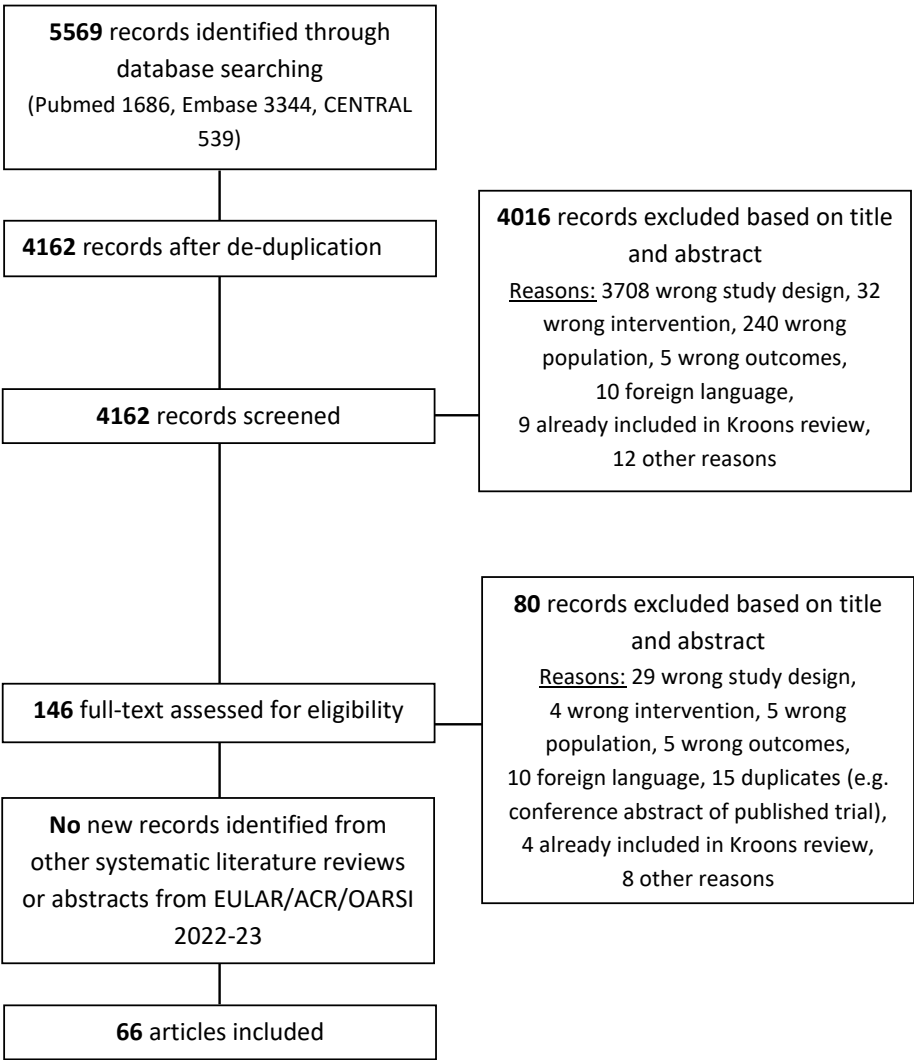

Figure 1. Flow chart of systematic literature review. ACR, American College of Rheumatology; EULAR, European Alliance of Associations for Rheumatology; OARSI, Osteoarthritis Research Society International

3. OVERVIEW OF NUMBER OF NEW AND PREVIOUS STUDIES INCLUDED IN META-ANALYSES

| Supplementary table 2. Overview of new and previous included studies. (One RCT with 3 groups, from which 2 groups (thermal treatment and control) is included as non-pharmacological therapy and 2 groups (herbs and control) are included as pharmacological therapy) |                                                                                            |                       |     |    |                           |                                                      |     |    |
|------------------------------------------------------------------------------------------------------------------------------------------------------------------------------------------------------------------------------------------------------------------------|--------------------------------------------------------------------------------------------|-----------------------|-----|----|---------------------------|------------------------------------------------------|-----|----|
|                                                                                                                                                                                                                                                                        | Therapy                                                                                    | Number of new studies |     |    |                           | Studies from Kroons review included in meta-analyses |     |    |
|                                                                                                                                                                                                                                                                        |                                                                                            | Total                 | RCT | CO | Included in meta-analyses | Total                                                | RCT | CO |
| Non-pharmacological (n=35)                                                                                                                                                                                                                                             | Hand exercises                                                                             | 11                    | 9   | 1  | 8                         | 5                                                    | 5   | 0  |
|                                                                                                                                                                                                                                                                        | <i>Hand exercises</i>                                                                      | 6                     | 5   | 1  | 2                         | 5                                                    | 5   | 0  |
|                                                                                                                                                                                                                                                                        | <i>Proprioceptive exercises</i>                                                            | 5                     | 5   | 0  | 5                         | 0                                                    | 0   | 0  |
|                                                                                                                                                                                                                                                                        | Orthoses (splints)                                                                         | 6                     | 5   | 1  | 2                         | 10                                                   | 9   | 1  |
|                                                                                                                                                                                                                                                                        | <i>Orthoses vs no orthoses</i>                                                             | 3                     | 3   | 0  | 2                         | 5                                                    | 5   | 0  |
|                                                                                                                                                                                                                                                                        | <i>CMC orthoses vs orthoses also immobilising the wrist and/or additional thumb joints</i> | 3                     | 2   | 1  | 3                         | 4                                                    | 0   | 4  |
|                                                                                                                                                                                                                                                                        | Assistive devices                                                                          | 1                     | 1   | 0  | 1                         | 1                                                    | 1   | 0  |
|                                                                                                                                                                                                                                                                        | Kinesiology tape                                                                           | 2                     | 2   | 0  | 0                         | 0                                                    | 0   | 0  |
|                                                                                                                                                                                                                                                                        | Thermal modalities                                                                         | 7                     | 7   | 0  | 2                         | 5                                                    | 5   | 0  |
|                                                                                                                                                                                                                                                                        | Ultrasound/laser therapy                                                                   | 1                     | 1   | 0  | 0                         | 2                                                    | 2   | 0  |
|                                                                                                                                                                                                                                                                        | Low-dose radiation*<br>(One study reported in 2 articles)                                  | 1                     | 1   | 0  | 0                         | 0                                                    | 0   | 0  |
|                                                                                                                                                                                                                                                                        | Vibrating gloves                                                                           | 1                     | 1   | 0  | 0                         | 0                                                    | 0   | 0  |
|                                                                                                                                                                                                                                                                        | Acupuncture                                                                                | 1                     | 1   | 0  | 0                         | 0                                                    | 0   | 0  |
|                                                                                                                                                                                                                                                                        | Combination programs                                                                       | 3                     | 3   | 0  | 2                         | 3                                                    | 3   | 0  |
| Pharmacological (n=17)                                                                                                                                                                                                                                                 | Herbs                                                                                      | 2                     | 2   | 0  | 0                         | 0                                                    | 0   | 0  |
|                                                                                                                                                                                                                                                                        | Topical NSAIDs                                                                             | 0                     | 0   | 0  | 0                         | 3                                                    | 3   | 0  |

|                                                |                                                                                                                                       |   |   |   |   |   |   |   |
|------------------------------------------------|---------------------------------------------------------------------------------------------------------------------------------------|---|---|---|---|---|---|---|
|                                                | Topical corticosteroid                                                                                                                | 1 | 1 | 0 | 0 | 0 | 0 | 0 |
|                                                | Oral NSAIDs                                                                                                                           | 0 | 0 | 0 | 0 | 3 | 3 | 0 |
|                                                | Oral glucocorticoids                                                                                                                  | 1 | 1 | 0 | 1 | 2 | 2 | 0 |
|                                                | Intra-articular glucocorticoids                                                                                                       | 0 | 0 | 0 | 0 | 3 | 3 | 0 |
|                                                | Intra-articular hyaluronic acid                                                                                                       | 1 | 1 | 0 | 1 | 2 | 2 | 0 |
|                                                | Biological disease-modifying anti-rheumatic drugs (bDMARDs)                                                                           | 3 | 3 | 0 | 0 | 4 | 3 | 1 |
|                                                | Synthetic DMARDs anti-rheumatic drugs (Hydrochloroquine)                                                                              | 1 | 1 | 0 | 2 | 2 | 2 | 0 |
|                                                | Synthetic DMARDs anti-rheumatic drugs (Methotrexate)                                                                                  | 2 | 2 | 0 | 2 | 0 | 0 | 0 |
|                                                | Platelet rich plasma injections                                                                                                       | 3 | 3 | 0 | 0 | 0 | 0 | 0 |
|                                                | Colchicine tablets                                                                                                                    | 2 | 2 | 0 | 2 | 0 | 0 | 0 |
|                                                | Oral conjugated oestrogens                                                                                                            | 1 | 1 | 0 | 0 | 0 | 0 |   |
|                                                |                                                                                                                                       |   |   |   |   |   |   |   |
| Pharmacological and non-pharmacological<br>(4) | Education+ exercises + orthosis, Diclofenac gel 1%                                                                                    | 1 | 1 | 0 | 0 | 0 | 0 | 0 |
|                                                | Extracorporeal shock wave therapy, intra-articular Hyaluronic Acid                                                                    | 1 | 1 | 0 | 0 | 0 | 0 | 0 |
|                                                | Nerve block injection + prednisolone + exercises<br>Exercises                                                                         | 1 | 1 | 0 | 0 | 0 | 0 | 0 |
|                                                | Botulinum toxin A injections+orthosis                                                                                                 | 1 | 1 | 0 | 0 | 0 | 0 | 0 |
| Surgery (10)                                   | Total joint replacement (Maia prosthesis)<br>Trapeziectomy                                                                            | 1 | 1 | 0 | 0 | 0 | 0 | 0 |
|                                                | Total joint replacement (Touch® TMC joint dual mobility press-fit prosthesis)<br>Trapeziectomy with tendon interposition arthroplasty | 1 | 1 | 0 | 0 | 0 | 0 | 0 |
|                                                | Total joint replacement (The double mobility TCMC prosthesis)<br>Trapezioectomy with resection-                                       | 1 | 1 | 0 | 0 | 0 | 0 | 0 |



|                                                                 |                                                                                                                                                                                                |   |   |   |   |   |   |   |
|-----------------------------------------------------------------|------------------------------------------------------------------------------------------------------------------------------------------------------------------------------------------------|---|---|---|---|---|---|---|
|                                                                 | interposition (flexor carpi radialis) arthroplasty                                                                                                                                             |   |   |   |   |   |   |   |
|                                                                 | Total joint replacement (Hydroxyapatite-coated Elektra™)<br>Trapezioectomy with LRTI<br>Joint replacement                                                                                      | 1 | 1 | 0 | 0 | 0 | 0 | 0 |
|                                                                 | Trapeziectomy alone<br>Trapeziectomy + LRTI*                                                                                                                                                   | 1 | 1 | 0 | 0 | 0 | 0 | 0 |
|                                                                 | Trapeziectomy with suspension-interposition arthroplasty<br>Trapeziectomy with a human dermal collagen template                                                                                | 1 | 1 | 0 | 0 | 0 | 0 | 0 |
|                                                                 | Trapeziectomy with LRTI<br>Trapeziectomy with suture-button suspensionplasty                                                                                                                   | 1 | 1 | 0 | 0 | 0 | 0 | 0 |
|                                                                 | Partial trapeziectomy with suspension and interposition arthroplasty based on Weilby technique<br>Total trapeziectomy with suspension and interposition arthroplasty based on Weilby technique | 1 | 1 | 0 | 0 | 0 | 0 | 0 |
|                                                                 | Arthroscopic distal hemitrapeziectomy<br>Open trapeziectomy                                                                                                                                    | 1 | 1 | 0 | 0 | 0 | 0 | 0 |
|                                                                 | LRTI<br>Hematoma distraction arthroplasty                                                                                                                                                      | 1 | 1 | 0 | 0 | 0 | 0 | 0 |
| <b>*LRTI = ligament reconstruction and tendon interposition</b> |                                                                                                                                                                                                |   |   |   |   |   |   |   |

## 4. CHARACTERISTICS AND RISK OF BIAS OF NEW INCLUDED STUDIES

### 4.1 NON-PHARMACOLOGICAL INTERVENTIONS

#### 4.1.1. Hand exercises: Risk of bias

| Study                       | Randomisation process | Deviations from intended interventions | Missing outcome data | Measurement of the outcome | Selection of the reported results | Overall bias | Comments                                                                                                                                                                                                                                                                                                                                                                                                                                   |
|-----------------------------|-----------------------|----------------------------------------|----------------------|----------------------------|-----------------------------------|--------------|--------------------------------------------------------------------------------------------------------------------------------------------------------------------------------------------------------------------------------------------------------------------------------------------------------------------------------------------------------------------------------------------------------------------------------------------|
| Kang 2019 <sup>1</sup>      | L                     | L                                      | L                    | H                          | S                                 | H            | Calibration of dynamometer not mentioned, nor the intra-rater reliability of the investigators. Effect size calculations not shown. Knowledge about interventions. Some selective outcome-reporting. Small sample. Differences in follow up time. Impossible to blind participants.                                                                                                                                                        |
| Leonard 2021 <sup>2</sup>   | L                     | L                                      | L                    | S                          | S                                 | S            | Self-reported outcomes / patients are the assessors. No blinding. No statistical analysis plan (SAP) available. Impossible to blind participants.                                                                                                                                                                                                                                                                                          |
| Magni 2022 <sup>3</sup>     | S                     | L                                      | L                    | H                          | L                                 | H            | Due to the nature of study design (knowledge of interventions and extra visits to health care providers in the intervention groups). No blinding. Some mistakes from randomisation (imbalances in allocation of women and KL-score.) Impossible to blind participants.                                                                                                                                                                     |
| McVeigh 2021 <sup>4</sup>   | L                     | L                                      | L                    | H                          | S                                 | H            | Self-reported VAS. Unclear which time-point is the primary one for measurement. Short follow up. No placebo. Knowledge of the intervention and unclear blinding may rise some bias, as well as an additional visit for treatment. Expectations of intervention may influence the outcome. No SAP, limited information about use of ITT in the method section - only a between group comparison reported. Impossible to blind participants. |
| Pedersini 2021 <sup>5</sup> | S                     | L                                      | L                    | S                          | H                                 | H            | Limited information. Simple random technique (computer based), no more info about allocation or concealment. The same therapist conducted the interventions for both groups. Impossible to blind participants, outcomes are self-reported. First analysis showed no differences between groups. The authors used the post-hoc analysis to conclude. several VAS questions and timepoints, including primary time point) not reported.      |

|                          |   |   |   |   |   |   |                                                                                                                                                                                      |
|--------------------------|---|---|---|---|---|---|--------------------------------------------------------------------------------------------------------------------------------------------------------------------------------------|
| Pisano 2022 <sup>6</sup> | L | H | H | H | S | H | No ITT, blinding or imputation if patient losses occurred. 40-70% did not perform their home exercise programme. No attention to incomplete data. High unknown loss of participants. |
|--------------------------|---|---|---|---|---|---|--------------------------------------------------------------------------------------------------------------------------------------------------------------------------------------|

4.1.2. Proprioceptive hand exercises: Risk of bias

| Study                              | Randomisation process | Deviations from intended interventions | Missing outcome data | Measurement of the outcome | Selection of the reported results | Overall bias | Comments                                                                                                                                                                                                                                                                                                                                                                                              |
|------------------------------------|-----------------------|----------------------------------------|----------------------|----------------------------|-----------------------------------|--------------|-------------------------------------------------------------------------------------------------------------------------------------------------------------------------------------------------------------------------------------------------------------------------------------------------------------------------------------------------------------------------------------------------------|
| Cantero-Tellez 2023 <sup>7</sup>   | S                     | S                                      | L                    | S                          | L                                 | H            | Pilot study. No info about randomisation process, nor on concealment. Between group comparison. No ITT, no blinding. New concept without validated measurements, other factors may influence outcome, which the authors acknowledge.                                                                                                                                                                  |
| Cantero-Tellez 2022a <sup>8</sup>  | S                     | L                                      | L                    | L                          | S                                 | S            | Block randomisation 1:1, single centre, high loss of participants, but still enough power. No SAP. Impossible to blind participants.                                                                                                                                                                                                                                                                  |
| Cantero-Tellez 2022b <sup>9</sup>  | S                     | S                                      | L                    | L                          | S                                 | H            | Block randomisation. Limited information about allocation process. ITT, between group. Unclear whether the participants knew their allocation in the trial. Differences between analyses described in the protocol and those performed. Few participants indicate non-realistic high effect sizes. Rated with high risk of bias as three domains are some concerns. Impossible to blind participants. |
| Campos-Villegas 2022 <sup>10</sup> | L                     | L                                      | L                    | S                          | S                                 | S            | Self-reported. Knowledge about the intervention. No SAP. Impossible to blind participants.                                                                                                                                                                                                                                                                                                            |
| Cruz-Gamero 2023 <sup>11</sup>     | S                     | L                                      | L                    | H                          | S                                 | H            | Lack of information on sex and x-ray. No blinding. High loss of participants, and even still powered, the adherence was not discussed (selective reporting). No SAP.                                                                                                                                                                                                                                  |

**4.1.3. Orthoses vs no orthoses or placebo: Risk of bias**

| Study                    | Randomisation process | Deviations from intended interventions | Missing outcome data | Measurement of the outcome | Selection of the reported results | Overall bias | Comments                                                                                                                                                                                                                                                                                                                                                                                    |
|--------------------------|-----------------------|----------------------------------------|----------------------|----------------------------|-----------------------------------|--------------|---------------------------------------------------------------------------------------------------------------------------------------------------------------------------------------------------------------------------------------------------------------------------------------------------------------------------------------------------------------------------------------------|
| Adams 2021 <sup>12</sup> | L                     | H                                      | L                    | S                          | L                                 | H            | Mistakes in delivery of orthoses, many participants lost to follow up in all groups due to reported reasons, of which are AEs. More than 5% loss. Outcomes self-reported by participants, possible knowledge about group allocation.                                                                                                                                                        |
| Can 2020 <sup>13</sup>   | S                     | H                                      | H                    | S                          | S                                 | H            | Limited information about concealment. 5 excluded from analysis in the intervention group due to mistake of not receiving the orthosis. No ITT. 17 hands excluded. Impossible to blind participants. High dropout in both group, reasons for dropout not completely described. No information about calibration of strength testing. No primary outcome complicates RoB evaluation. No SAP. |
| Silva 2020 <sup>14</sup> | L                     | L                                      | L                    | H                          | S                                 | H            | Due to the design of the study (blinding not possible). No SAP. Analysis presented adjusted with the Bonferroni                                                                                                                                                                                                                                                                             |

**4.1.4. Thumb orthoses immobilising the CMC-joint only vs thumb orthoses also immobilising the wrist and/or more additional joints: Risk of bias**

| Study                              | Randomisation process | Deviations from intended interventions | Missing outcome data | Measurement of the outcome | Selection of the reported results | Overall bias | Comments                                                                                                                                                                                            |
|------------------------------------|-----------------------|----------------------------------------|----------------------|----------------------------|-----------------------------------|--------------|-----------------------------------------------------------------------------------------------------------------------------------------------------------------------------------------------------|
| Cantero-Tellez 2018a <sup>15</sup> | H                     | L                                      | L                    | S                          | L                                 | H            | Pilot study and new concept without validated evaluation. Allocation due to order of arrival over time. Impossible to blind participants. No information about concealment. Self-reported outcomes. |

|                                    |   |   |   |   |   |   |                                                                                                                                                                                                                                                                                                                                                                                                                                                              |
|------------------------------------|---|---|---|---|---|---|--------------------------------------------------------------------------------------------------------------------------------------------------------------------------------------------------------------------------------------------------------------------------------------------------------------------------------------------------------------------------------------------------------------------------------------------------------------|
| Cantero-Tellez 2018b <sup>16</sup> | S | L | L | L | S | S | Incomplete information about allocation; “Patients were divided into 2 equal groups using a randomized allocation”. Very short follow up.                                                                                                                                                                                                                                                                                                                    |
| Eyiis 2023 <sup>17</sup>           | S | L | L | H | H | H | Lack of randomization procedure information. Tendencies of imbalances in groups, but statistical comparisons are not presented. Unblinded with potential knowledge about intervention. Self-reported outcome. No SAP. This is a special report, as it raises to questions: brace material/technology, and joint stabilization. It acknowledges the differences, but report on only one. Satisfaction may be related to both, and high risk of bias is given. |

4.1.5. Assistive devices: Risk of bias

| Study                     | Randomisation process | Deviations from intended interventions | Missing outcome data | Measurement of the outcome | Selection of the reported results | Overall bias | Comments                                                                                                                                                                                                                                                                      |
|---------------------------|-----------------------|----------------------------------------|----------------------|----------------------------|-----------------------------------|--------------|-------------------------------------------------------------------------------------------------------------------------------------------------------------------------------------------------------------------------------------------------------------------------------|
| Amaral 2018 <sup>18</sup> | S                     | L                                      | L                    | S                          | S                                 | H            | Unclear allocation with risk of bias (en bloc), unclear description of the block procedure. Self-reported outcomes. No blinding, and more frequent interaction with investigators for intervention group which may lead to bias-potentials and more satisfaction as measured. |

4.1.6. Kinesiology tape-studies: Risk of bias

| Study                        | Randomisation process | Deviations from intended interventions | Missing outcome data | Measurement of the outcome | Selection of the reported results | Overall bias | Comments                                                                                                                                                                                                                                                                                                                                                                                                                                                                                                                                                            |
|------------------------------|-----------------------|----------------------------------------|----------------------|----------------------------|-----------------------------------|--------------|---------------------------------------------------------------------------------------------------------------------------------------------------------------------------------------------------------------------------------------------------------------------------------------------------------------------------------------------------------------------------------------------------------------------------------------------------------------------------------------------------------------------------------------------------------------------|
| Farhadian 2019 <sup>19</sup> | S                     | S                                      | L                    | S                          | H                                 | H            | Lack of information (i.e., disease severity and adverse effects). Impossible to blind participants. Self-reported outcomes. Selection of reporting highly possible. No real placebo.                                                                                                                                                                                                                                                                                                                                                                                |
| Wade 2018 <sup>20</sup>      | S                     | L                                      | L                    | S                          | S                                 | H            | Very open criteria which may rise the risk of confounders as no stratification was done. No table with baseline data presented. Gender and age variability, work and smoking reported in the text. VAS is not inappropriate; however, question marks should be raised to recruitment as there may be too many confounders affecting the outcome. A small number of participants, leaving the study highly underpowered. Both groups used some form of tape, no real control group (without tape) to control for the placebo-effect. No SAP, incomplete recruitment. |

4.1.7. Thermal modalities: Risk of bias

| Study                       | Randomisation process | Deviations from intended interventions | Missing outcome data | Measurement of the outcome | Selection of the reported results | Overall bias | Comments                                                                                                                                                                                                                               |
|-----------------------------|-----------------------|----------------------------------------|----------------------|----------------------------|-----------------------------------|--------------|----------------------------------------------------------------------------------------------------------------------------------------------------------------------------------------------------------------------------------------|
| Aksanyar 2022 <sup>21</sup> | S                     | S                                      | L                    | L                          | S                                 | S            | Flip-coin randomization, no info about concealment, statistical analysis plan, no power calculation. Single blinded for allocation (assessor), with a theoretical bias of knowledge about intervention among participants. However, no |

|                                    |   |   |   |   |   |   |                                                                                                                                                                                                                                                                                                                                                                                                                                                                                                                                           |
|------------------------------------|---|---|---|---|---|---|-------------------------------------------------------------------------------------------------------------------------------------------------------------------------------------------------------------------------------------------------------------------------------------------------------------------------------------------------------------------------------------------------------------------------------------------------------------------------------------------------------------------------------------------|
|                                    |   |   |   |   |   |   | differences between groups at BL or outcomes.                                                                                                                                                                                                                                                                                                                                                                                                                                                                                             |
| Benini 2021 <sup>22</sup>          | L | L | L | S | L | S | Single-blinded (investigator). Italian version of AUSCAN not validated, however FIHOA was and somehow confirmed the AUSCAN scorings. Self-reported outcomes.                                                                                                                                                                                                                                                                                                                                                                              |
| De Azevedo 2023 <sup>23</sup>      | S | S | L | H | S | H | Abstract only. Little information about both randomization and analysis processes. No blinding and self-reported outcome. No SAP.                                                                                                                                                                                                                                                                                                                                                                                                         |
| Kasapoğlu Aksoy 2018 <sup>24</sup> | S | S | L | S | S | H | Lack of information regarding randomisation and concealment. Lack of baseline data and treatments. No info about what participants knew about received intervention. Reasons for dropouts not reported. Modified ITT? No SAP. No effect sizes mentioned, even though this was supposed to be calculated. Possible selective reporting of results.                                                                                                                                                                                         |
| Savas 2019 <sup>25</sup>           | S | S | L | S | S | H | Lack of information about the randomisation process, analyses and participation rate in the control group. The nature of the study design, and few participants add to the RoB-score.                                                                                                                                                                                                                                                                                                                                                     |
| Ustun 2023 <sup>26</sup>           | H | H | L | H | S | H | Randomization with "the envelope-method" is the only information provided. Importantly: Disease duration or severity not reported between groups, and function differed - not possible to say if this is a chance finding or related to the process (little information). otherwise looks balanced. No blinding. Differences in follow up and knowledge about interventions. No information about additional treatments allowed by participants (i.e., rescue medications), which may lead to an increased RoB in a small sample. No SAP. |
| Öncel 2021 <sup>27</sup>           | H | L | L | S | S | H | Randomisation: sealed envelope method, performed locally with no information about who performed it, or when treatment started. No information about blocks or stratification. Many issues that may compromise the allocation is reported, this process is open to deliberate tampering and considered to beat the lower end compared to distance randomization processes. Differences in                                                                                                                                                 |

|  |  |  |  |  |  |
|--|--|--|--|--|--|
|  |  |  |  |  |  |
|--|--|--|--|--|--|

gender allocation with more men receiving the paraffin. No information concerning disease severity or joint count. Possible knowledge of the intervention. No info about power-calculations. Unclear reporting. No SAP.

4.1.8. Ultrasound/laser therapy: Risk of bias

| Study                              | Randomisation process | Deviations from intended interventions | Missing outcome data | Measurement of the outcome | Selection of the reported results | Overall bias | Comments                                                                                                                                                                                                                                                                                                                                           |
|------------------------------------|-----------------------|----------------------------------------|----------------------|----------------------------|-----------------------------------|--------------|----------------------------------------------------------------------------------------------------------------------------------------------------------------------------------------------------------------------------------------------------------------------------------------------------------------------------------------------------|
| Cantero-Tellez. 2020 <sup>28</sup> | L                     | S                                      | H                    | L                          | S                                 | H            | Analysis method not described. Discordance between flow chart and table 2 concerning loss of participants and n used in analysis, no information about reasons for losses. Cannot see that last observation was carried forward as protocolled for follow up. Dropouts seem to be excluded. The total loss of participant (4+4) calculates to 18%. |

4.1.9. Low-dose radiation: Risk of bias

| Study                           | Randomisation process | Deviations from intended interventions | Missing outcome data | Measurement of the outcome | Selection of the reported results | Overall bias | Comments                                                                          |
|---------------------------------|-----------------------|----------------------------------------|----------------------|----------------------------|-----------------------------------|--------------|-----------------------------------------------------------------------------------|
| Minten 2018 <sup>29</sup>       | L                     | S                                      | L                    | L                          | L                                 | S            | Therapist not blinded to group allocation. Analyses not clearly described. No SAP |
| Van den Ende 2020 <sup>30</sup> | L                     | L                                      | L                    | L                          | L                                 | L            | Methodically well performed and reported                                          |



4.1.10. Gloves: Risk of bias

| Study                      | Randomisation process | Deviations from intended interventions | Missing outcome data | Measurement of the outcome | Selection of the reported results | Overall bias | Comments                                                                                                                                                                                                                                                                                                                                        |
|----------------------------|-----------------------|----------------------------------------|----------------------|----------------------------|-----------------------------------|--------------|-------------------------------------------------------------------------------------------------------------------------------------------------------------------------------------------------------------------------------------------------------------------------------------------------------------------------------------------------|
| Jamison 2018 <sup>31</sup> | H                     | H                                      | H                    | H                          | H                                 | H            | Lack of information presented. Participants got paid to participate, participants in control group also wanted interventions. Substantial loss of participants questions the validity of analyses. Not controlling for external factors that may have affected the outcomes. No SAP or appropriate information to complete all RoB-evaluations. |

4.1.11. Acupuncture: Risk of bias

| Study                      | Randomisation process | Deviations from intended interventions | Missing outcome data | Measurement of the outcome | Selection of the reported results | Overall bias | Comments                                                                                                                                                                                                     |
|----------------------------|-----------------------|----------------------------------------|----------------------|----------------------------|-----------------------------------|--------------|--------------------------------------------------------------------------------------------------------------------------------------------------------------------------------------------------------------|
| Barnard 2020 <sup>32</sup> | L                     | S                                      | L                    | L                          | L                                 | S            | Unintended accidents with risk of confusing the blinding. No passive / real control group to evaluate context bias, expectations or real effects of treatment. However, few other limitations for RoB2-tool. |

4.1.12. Combination programmes: Risk of bias

| Study                                       | Randomisation process | Deviations from intended interventions | Missing outcome data | Measurement of the outcome | Selection of the reported results | Overall bias | Comments                                                                                                                                                                                                                                                                                                                                                                                          |
|---------------------------------------------|-----------------------|----------------------------------------|----------------------|----------------------------|-----------------------------------|--------------|---------------------------------------------------------------------------------------------------------------------------------------------------------------------------------------------------------------------------------------------------------------------------------------------------------------------------------------------------------------------------------------------------|
| Rodriguez Sanchez-Lauhlè 2023 <sup>33</sup> | L                     | L                                      | L                    | H                          | H                                 | H            | High loss of participants, but still powered. Primary outcome: Performed by phone instead of self-reported directly due to Covid-19. Knowledge about intervention and group allocation. Differences in health-care visits. No SAP. Even being a well performed study, bias evaluation is based upon principles of related to D4 and D5 as specified by Cochrane chapter 8.6 for RoB2 evaluations. |
| Stoffer-Marx 2018 <sup>34</sup>             | S                     | L                                      | L                    | H                          | S                                 | H            | Based on the first and fourth domains, in addition, complete blinding was not possible, even though the significance would be presumably low for the assessed outcome for this report.                                                                                                                                                                                                            |
| Tveter 2022 <sup>35</sup>                   | L                     | L                                      | L                    | S                          | L                                 | S            | Blinding of participants not possible. Any risk of interaction between participants are not discussed. Self-reported outcomes. Little time / interaction with therapists.                                                                                                                                                                                                                         |

4.2 PHARMACOLOGICAL INTERVENTIONS

4.2.1. Herbal treatment: Risk of bias

| Study                    | Randomisation process | Deviations from intended interventions | Missing outcome data | Measurement of the outcome | Selection of the reported results | Overall bias | Comments                                                                                                                                                                                                                                                                                                                                                                                                                                                                                                                                                                                                                               |
|--------------------------|-----------------------|----------------------------------------|----------------------|----------------------------|-----------------------------------|--------------|----------------------------------------------------------------------------------------------------------------------------------------------------------------------------------------------------------------------------------------------------------------------------------------------------------------------------------------------------------------------------------------------------------------------------------------------------------------------------------------------------------------------------------------------------------------------------------------------------------------------------------------|
| Kim 2021 <sup>36</sup>   | L                     | S                                      | H                    | L                          | H                                 | H            | A high proportion of patients excluded from final analysis due to missing follow-up even though they received allocated treatment. Participants excluded from analysis, unclear from the flow chart which group they belonged to. Missing power analysis and effect size estimates. Assumptions that the authors are favouring intervention group and do not mention the superior outcomes for the control group. Funded by the manufacturer of the intervention medicine, and supportive presentation of this study is reasonable. The effects presented as "statistically significant" are small and may even clinical undetectable. |
| Liu 2021 <sup>37</sup>   | L                     | L                                      | L                    | L                          | L                                 | L            |                                                                                                                                                                                                                                                                                                                                                                                                                                                                                                                                                                                                                                        |
| Savas 2019 <sup>38</sup> | S                     | S                                      | L                    | S                          | S                                 | H            | Lack of information about the analyses and participation rate for control group and randomisation process. The nature of the study design, and few participants add to the RoB-score.                                                                                                                                                                                                                                                                                                                                                                                                                                                  |

4.2.2. Topical glucocorticoids: Risk of bias

| Study                      | Randomisation process | Deviations from intended interventions | Missing outcome data | Measurement of the outcome | Selection of the reported results | Overall bias | Comments                                 |
|----------------------------|-----------------------|----------------------------------------|----------------------|----------------------------|-----------------------------------|--------------|------------------------------------------|
| Wang Y 2023a <sup>39</sup> | L                     | L                                      | L                    | L                          | L                                 | L            | No SAP found, but ITT is obviously used. |

4.2.3. Oral glucocorticoids: Risk of bias

| Study                    | Randomisation process | Deviations from intended interventions | Missing outcome data | Measurement of the outcome | Selection of the reported results | Overall bias | Comments |
|--------------------------|-----------------------|----------------------------------------|----------------------|----------------------------|-----------------------------------|--------------|----------|
| Kroon 2019 <sup>40</sup> | L                     | L                                      | L                    | L                          | L                                 | L            |          |

4.2.4. Intra-articular Hyaluronic acid: Risk of bias

| Study                     | Randomisation process | Deviations from intended interventions | Missing outcome data | Measurement of the outcome | Selection of the reported results | Overall bias | Comments                                                                                                                                                                                                                                                                                     |
|---------------------------|-----------------------|----------------------------------------|----------------------|----------------------------|-----------------------------------|--------------|----------------------------------------------------------------------------------------------------------------------------------------------------------------------------------------------------------------------------------------------------------------------------------------------|
| Wang P 2023 <sup>41</sup> | S                     | L                                      | L                    | L                          | S                                 | S            | Imbalances in randomization (sex and dominant vs non-dominant hand affection) potentially influencing the outcome - especially here due to lack of power calculation and analysing a very small sample. No SAP. No control groups. In turn, one should interpret these results with caution. |

4.2.5. Biological DMARDs/TNF-inhibitors: Risk of bias

| Study                            | Randomisation process | Deviations from intended interventions | Missing outcome data | Measurement of the outcome | Selection of the reported results | Overall bias | Comments                                                                       |
|----------------------------------|-----------------------|----------------------------------------|----------------------|----------------------------|-----------------------------------|--------------|--------------------------------------------------------------------------------|
| Kloppenburger 2019 <sup>42</sup> | L                     | L                                      | S                    | L                          | S                                 | S            | Loss of participants. Lack of information available for the RoB2 users, no SAP |
| Richette 2021 <sup>43</sup>      | L                     | L                                      | L                    | L                          | L                                 | L            |                                                                                |

|                           |   |   |   |   |   |   |                                                                                                                                                                                                                                                                                                                                                                                                           |
|---------------------------|---|---|---|---|---|---|-----------------------------------------------------------------------------------------------------------------------------------------------------------------------------------------------------------------------------------------------------------------------------------------------------------------------------------------------------------------------------------------------------------|
| Schett 2020 <sup>44</sup> | S | L | L | L | H | H | No statistic estimates for baseline. Control group tended to be younger and with longer disease duration. No stratification, the number of blocks were few and made by the sponsor of the study. ITT of the primary analysis is presented with non-statistical differences; however, the conclusion ids based on results from secondary analysis. Analysis made by sponsors and authors. No SAP available |
|---------------------------|---|---|---|---|---|---|-----------------------------------------------------------------------------------------------------------------------------------------------------------------------------------------------------------------------------------------------------------------------------------------------------------------------------------------------------------------------------------------------------------|

4.2.6. Synthetic DMARDs (Hydrochloroquine): Risk of bias

| Study                    | Randomisation process | Deviations from intended interventions | Missing outcome data | Measurement of the outcome | Selection of the reported results | Overall bias | Comments                                                                                                                                                                                        |
|--------------------------|-----------------------|----------------------------------------|----------------------|----------------------------|-----------------------------------|--------------|-------------------------------------------------------------------------------------------------------------------------------------------------------------------------------------------------|
| Kedor 2021 <sup>45</sup> | S                     | L                                      | S                    | S                          | L                                 | S            | Imbalanced groups with regards to sex. Unclear how analysis was performed. Exclusions of eligible participants for whom outcome data are available. Unblinding possible due to adverse effects. |

4.2.7. Synthetic DMARDs (Methotrexate): Risk of bias

| Study                      | Randomisation process | Deviations from intended interventions | Missing outcome data | Measurement of the outcome | Selection of the reported results | Overall bias | Comments                                                                                                                     |
|----------------------------|-----------------------|----------------------------------------|----------------------|----------------------------|-----------------------------------|--------------|------------------------------------------------------------------------------------------------------------------------------|
| Ferrero 2021 <sup>46</sup> | S                     | S                                      | L                    | L                          | S                                 | S            | Control group imported from another stud Baseline data not available. Radiological readings involve some judgements. No SAP. |
| Wang Y 2023b <sup>47</sup> | L                     | L                                      | L                    | L                          | L                                 | L            | A 15% loss of participants reported, balanced between groups. Still enough power to detect warranted effects. Some           |

|  |  |  |  |  |  |                                                                   |
|--|--|--|--|--|--|-------------------------------------------------------------------|
|  |  |  |  |  |  | imbalances in group allocations, but not influencing the results. |
|--|--|--|--|--|--|-------------------------------------------------------------------|

4.2.8. Platelet-rich plasma: Risk of bias

| Study                                | Randomisation process | Deviations from intended interventions | Missing outcome data | Measurement of the outcome | Selection of the reported results | Overall bias | Comments                                                                                                                                                                                                                                                                                                                                                                                                                                                                                                                                                                                                                                                                                                                                                                                                                                                                              |
|--------------------------------------|-----------------------|----------------------------------------|----------------------|----------------------------|-----------------------------------|--------------|---------------------------------------------------------------------------------------------------------------------------------------------------------------------------------------------------------------------------------------------------------------------------------------------------------------------------------------------------------------------------------------------------------------------------------------------------------------------------------------------------------------------------------------------------------------------------------------------------------------------------------------------------------------------------------------------------------------------------------------------------------------------------------------------------------------------------------------------------------------------------------------|
| Abdelsabor Sabaah 2020 <sup>48</sup> | S                     | S                                      | L                    | H                          | H                                 | H            | No control group. Few participants. Incomplete presentation of methods and outcomes. Potential selective presentation.                                                                                                                                                                                                                                                                                                                                                                                                                                                                                                                                                                                                                                                                                                                                                                |
| Malahias 2021 <sup>49</sup>          | S                     | S                                      | L                    | S                          | S                                 | H            | Overall limited information about critical parts of the process (allocation, randomisation, analysis). Small sample sizes and lack of control group.                                                                                                                                                                                                                                                                                                                                                                                                                                                                                                                                                                                                                                                                                                                                  |
| Winter 2023 <sup>50</sup>            | S                     | S                                      | H                    | L                          | H                                 | H            | Computer randomized ("randomizer"). Blinded participants, not clear until when (concealment). Disease duration not reported, and nor rescue medications. Flow-chart unclear: 100 persons were randomized, 88 left for 2y follow up. However, 1 is lost <i>before</i> allocation, even 100 were allocated from which 5 did not get the injections, and 6 more were lost during the study. This is a N=12 = 12% loss from randomization, and a 7.4% loss from those being treated. Reasons for losses not completely reported. Thus, unclear how many were analysed in each group (differences in losses). Sensitivity analysis highlighted, but no reporting of between-group differences in pain or power to support the conclusions. Small samples add to risk of wrong conclusions. It was not feasible to blind surgeons. No SAP. Naïve protocol analysis seems to have been used. |

2.9. Colchicine: Risk of bias

| Study                      | Randomisation process | Deviations from intended interventions | Missing outcome data | Measurement of the outcome | Selection of the reported results | Overall bias | Comments                                                                                                                                                                                                                          |
|----------------------------|-----------------------|----------------------------------------|----------------------|----------------------------|-----------------------------------|--------------|-----------------------------------------------------------------------------------------------------------------------------------------------------------------------------------------------------------------------------------|
| Davis 2021 <sup>51</sup>   | L                     | L                                      | L                    | L                          | L                                 | L            |                                                                                                                                                                                                                                   |
| Døssing 2023 <sup>52</sup> | L                     | S                                      | L                    | L                          | L                                 | S            | Little information about final demographics, blinding, and adverse effects. A well performed abstract with references to clinicaltrials.com and protocol. However, still some information lacking to receive better RoB2 outcome. |

4.2.10. Oestrogens: Risk of bias

| Study                       | Randomisation process | Deviations from intended interventions | Missing outcome data | Measurement of the outcome | Selection of the reported results | Overall bias | Comments |
|-----------------------------|-----------------------|----------------------------------------|----------------------|----------------------------|-----------------------------------|--------------|----------|
| Williams 2022 <sup>53</sup> | L                     | L                                      | L                    | L                          | L                                 | L            |          |

## 4.3.1. Pharmacological and non-pharmacological interventions: Risk of bias

| Study                          | Randomisation process | Deviations from intended interventions | Missing outcome data | Measurement of the outcome | Selection of the reported results | Overall bias | Comments                                                                                                                                                                                                                                                                                                                                                                                                                                                         |
|--------------------------------|-----------------------|----------------------------------------|----------------------|----------------------------|-----------------------------------|--------------|------------------------------------------------------------------------------------------------------------------------------------------------------------------------------------------------------------------------------------------------------------------------------------------------------------------------------------------------------------------------------------------------------------------------------------------------------------------|
| Deveza 2021 <sup>54</sup>      | S                     | H                                      | L                    | H                          | L                                 | H            | A higher expectancy and intervention credibility noted in the intervention group. Accidental unblinding of assessor (n=25). Adverse effects.                                                                                                                                                                                                                                                                                                                     |
| Ioppolo 2018 <sup>55</sup>     | L                     | S                                      | L                    | H                          | H                                 | H            | Person who administered the self-reported outcomes (primary) and secondary outcomes has an unreported blinding-status and role. Evaluation tool not validated for CMC-OA. Unbalanced presentation of effects. No estimates or reporting of clinical relevance of the findings. Focuses on hypothetical working mechanisms not assessed in this study, excluding patients' beliefs as well as contextual biases due to a lack of blinding. No real control group. |
| Metin Ökmen 2018 <sup>56</sup> | S                     | S                                      | L                    | H                          | S                                 | L            | No information about concealment or allocation due to disease severity (radiological). Limited information concerning the blinding. No info about ITT. Between group comparison is performed, but no effect size or clinical relevance reported. No placebo. Knowledge of the intervention may rise some bias, as well as an additional visit for treatment. No SAP.                                                                                             |
| Nguyen 2022 <sup>57</sup>      | L                     | L                                      | L                    | L                          | L                                 | L            |                                                                                                                                                                                                                                                                                                                                                                                                                                                                  |



4.4. SURGICAL INTERVENTIONS

4.4.1. Surgical interventions including joint replacement: Risk of bias

| Study                          | Randomisation process | Deviations from intended interventions | Missing outcome data | Measurement of the outcome | Selection of the reported results | Overall bias | Comments                                                                                                                                                                                                                                                                                                                                                                                                                                                                                                                                                                                                          |
|--------------------------------|-----------------------|----------------------------------------|----------------------|----------------------------|-----------------------------------|--------------|-------------------------------------------------------------------------------------------------------------------------------------------------------------------------------------------------------------------------------------------------------------------------------------------------------------------------------------------------------------------------------------------------------------------------------------------------------------------------------------------------------------------------------------------------------------------------------------------------------------------|
| De Jong 2023 <sup>58</sup>     | L                     | L                                      | L                    | L                          | L                                 | L            | Well performed and presented. Disease duration not mentioned (important for pain?). ITT-analysis used. Self-reported outcome. Of note: The MHQ may have been a threat to internal validity due to inappropriateness to be used for sample size calculation in this study.                                                                                                                                                                                                                                                                                                                                         |
| Guzzini 2023 <sup>59</sup>     | S                     | H                                      | L                    | H                          | H                                 | H            | Both groups received information about both procedures, and were then randomized. No more information regarding concealment before the actual surgery was done. No blinding. Different regimen postoperatively.                                                                                                                                                                                                                                                                                                                                                                                                   |
| Klim 2023 <sup>60</sup>        | L                     | L                                      | L                    | H                          | S                                 | H            | A substantial difference in dominant vs non-dominant hand between groups which potentially has an impact on the outcome of interest. Also, age differs. No statistical comparison or comments of value to table 1. Rating given due those imbalances not commented, lack of information and no SAP. Unclear section: Flowchart; Loss to follow up is balances (around 8% in both groups, mostly due to declinations). However: Sample size based upon pilot (no references), but no more information is needed about number of patients and what calculation was done (i.e., whether loss is taken into account). |
| Thorkildsen 2019 <sup>61</sup> | S                     | H                                      | L                    | H                          | L                                 | H            | Imbalances in baseline data. Low RoB score is furthermore due to the natural consequences and risks of surgery trials with change of groups/procedures due to AEs etc., however the authors are aware the biases. Possible floor effect for the evaluation tool potentially leading to a type 1 error.                                                                                                                                                                                                                                                                                                            |

## 4.4.2. Surgical interventions comparing different techniques: Risk of bias

| Study                            | Randomisation process | Deviations from intended interventions | Missing outcome data | Measurement of the outcome | Selection of the reported results | Overall bias | Comments                                                                                                                                                                                                                                                                                                                   |
|----------------------------------|-----------------------|----------------------------------------|----------------------|----------------------------|-----------------------------------|--------------|----------------------------------------------------------------------------------------------------------------------------------------------------------------------------------------------------------------------------------------------------------------------------------------------------------------------------|
| Brennan 2021 <sup>62</sup>       | L                     | S                                      | S                    | H                          | S                                 | H            | ITT impossible due to the available data. High loss to follow up. Validity of evaluation questionable for the purpose. No control group.                                                                                                                                                                                   |
| Marks 2017 <sup>63</sup>         | L                     | H                                      | L                    | S                          | S                                 | H            | Violation to allocation occurred, resulting in a per protocol analyses. Differences in adverse effects between groups may have influenced the self-reported outcomes. Change in outcome of interest (from subscale to total sum) without information of why or when this was done.                                         |
| Morais 2022 <sup>64</sup>        | S                     | S                                      | L                    | S                          | S                                 | S            | Little information about concealment, also scarce about blinding. Due to different post-operative regimes allocation may have been revealed. AEs = 9%; 3 persons needed reoperation (representatives from both groups). Unclear information about outcomes (time points and primary/secondary). No SAP, no info about ITT. |
| Sanchez-Flo 2020 <sup>65</sup>   | L                     | S                                      | L                    | S                          | S                                 | S            | Per protocol analyses. Knowledge about the interventions and influence from the examiner. No SAP, but agreements between methods and results. The authors present their process and interpretations with caution.                                                                                                          |
| Van Laarhoven 2022 <sup>66</sup> | S                     | L                                      | L                    | H                          | S                                 | H            | Little information about demographics (i.e., disease duration). Gender differences between groups- potentially relevant for i.e., pain. No blinding. No SAP.                                                                                                                                                               |
| Zarezadeh 2021 <sup>67</sup>     | S                     | S                                      | L                    | H                          | S                                 | H            | Little information about randomisation and concealments. Different regimen may have unblinded staff or participants. Unclear evaluation. No reports of adverse effects. No SAP or information about ITT.                                                                                                                   |

Table 1. Characteristics of studies of non-pharmacological interventions published up to June 7<sup>th</sup> 2017 that are included in the meta-analyses

| RoB       | Study                                   | Design                             | Intervention                                                                         | Duration, frequency, instructions                                                                     | Measure-ment timepoints analyzed | N  | OA location, definition               | Women (%) | Age in years (SD) | Primary outcome (PO)                                                         |
|-----------|-----------------------------------------|------------------------------------|--------------------------------------------------------------------------------------|-------------------------------------------------------------------------------------------------------|----------------------------------|----|---------------------------------------|-----------|-------------------|------------------------------------------------------------------------------|
| Exercises |                                         |                                    |                                                                                      |                                                                                                       |                                  |    |                                       |           |                   |                                                                              |
|           | Hennig 2015 <sup>68</sup>               | RCT parallel                       | A: Exercise + education                                                              | A: Progressive exercise program 3x10-15 reps, 3days/ w for 12 w                                       | Long-term                        | 40 | Hand, ACR                             | 100       | 60.6 (7.9)        | Activity performance measured with PSFS after 12 w (GRIP-IT)                 |
|           |                                         |                                    | B: Education                                                                         |                                                                                                       |                                  | 40 |                                       | 100       | 60.9 (6.2)        |                                                                              |
|           | Lefler 2004 <sup>69</sup>               | RCT parallel                       | A: Exercise                                                                          | A: Exercises 10-15 repetitions of <40% 1RM to 6-8 >60% 1RM for 6 w                                    | Short-term                       | 9  | Hand, criteria NR                     | 88.9      | 82.0 (10.0)       | NR. Measured pain (VAS) and grip strength.                                   |
|           |                                         |                                    | B: Control                                                                           |                                                                                                       |                                  | 10 |                                       | 90        | 82.0 (9.0)        |                                                                              |
|           | Nery.2021 <sup>70</sup><br>(Nery 2015)* | RCT parallel                       | A: Progressive resistance exercise program + a single education session              | A: Exercises 3x10 repetitions twice a w for 12 w                                                      | Short-term                       | 30 | Hand, ACR, history of IP pain NRS 3-8 | 97        | 64.7 (8.9)        | Pain (NRS) after 6 and 12 w                                                  |
|           |                                         |                                    | B: Single education session                                                          |                                                                                                       | Long-term                        | 30 |                                       | 100       | 68.9 (8.8)        |                                                                              |
|           | Paolillo 2015 <sup>71</sup>             | RCT parallel<br><br>(three groups) | A: Low level laser therapy (LLLT) (diode laser 808 nm) + ultrasound + hand exercises | A and B: Laser + ultrasound, 15 min per hand, once a w for 12 w                                       | Long-term                        | 13 | Hand, criteria NR                     | 100       | 68 (6)            | NR. Measured grip strength (JAMAR) and pain threshold (algometer) after 12 w |
|           |                                         |                                    | B: LLL (diode laser 808 nm) + ultrasound                                             | A: 10 daily exercises with progressive load every 15 <sup>th</sup> day,1 session of 15 min/w for 12 w |                                  | 13 |                                       |           | 69 (5)            |                                                                              |
|           |                                         |                                    | C: Sham laser therapy**                                                              |                                                                                                       |                                  | 11 |                                       |           | 72 (6)            |                                                                              |

|                                                 |                                   |                                         |                                                                                              |                                                                                                                                                                                                         |                         |              |                                            |                 |                              |                                                   |
|-------------------------------------------------|-----------------------------------|-----------------------------------------|----------------------------------------------------------------------------------------------|---------------------------------------------------------------------------------------------------------------------------------------------------------------------------------------------------------|-------------------------|--------------|--------------------------------------------|-----------------|------------------------------|---------------------------------------------------|
|                                                 | Østerås 2014 <sup>72</sup>        | RCT parallel                            | A: Exercise + usual care<br>B: Usual care                                                    | A: Exercises with 10-15 repetitions, 3 days/w for 12 w                                                                                                                                                  | Long-term               | 65<br>65     | Hand, ACR                                  | 89<br>91        | 67(8.0)<br>65 (9.0)          | Activity performance (PSFS and FIHOA) after 12 w  |
| <b>Thumb orthoses vs no orthoses or placebo</b> |                                   |                                         |                                                                                              |                                                                                                                                                                                                         |                         |              |                                            |                 |                              |                                                   |
|                                                 | Adams 2014 <sup>73</sup>          | RCT parallel Pilot study (three groups) | A: Thumb orthosis + occupational therapy<br>B: Occupational therapy<br>C: Placebo orthosis** | A or B: Program duration = 4 w<br><br>Content of occupational therapy and instructions for use of orthoses not described.                                                                               | Short-term              | 9<br><br>9   | CMC, NR                                    | 78 (sample)     | 61.2 (9.4) (sample)          | Pain (AUSCAN) at 4 w                              |
|                                                 | Arazpour 2017 <sup>74</sup>       | RCT parallel                            | A: Custom-made thumb orthosis<br>B: No intervention                                          | A: Orthosis should be used in 4 w when performing ADL and removed during sleeping and bathing                                                                                                           | Short-term              | 16<br>9      | CMC, clinical diagnosis and E-L stage I-II | 87<br>88        | 50.2 (5.7)<br>52.3 (6.4)     | NR. Measured pain (VAS) and function (MHQ) at 4 w |
|                                                 | Gomes-Carreira 2010 <sup>75</sup> | RCT parallel                            | A: Custom-made thumb orthosis<br>B: No intervention                                          | A: Orthosis should be used in 26 w when performing ADL and removed during sleeping and bathing                                                                                                          | Short-term<br>Long-term | 40<br>40     | CMC, clinical diagnosis and E-L stage I-II | 100<br>90       | 62.8 (8.5)<br>65.1 (10.1)    | Pain at the base of the thumb (VAS)               |
|                                                 | Hermann 2014 <sup>76</sup>        | RCT parallel                            | A: Prefabricated thumb orthosis + exercises<br><br>B: Exercises only                         | A: Orthosis should be used as much as participants wanted in 2 months, especially when symptomatic and performing heavy tasks. A and B: Exercises: 2 sessions/day with 10 rep per exercise for 2 months | Short-term              | 30<br><br>29 | CMC, ACR, thumb pain                       | 96.2<br><br>100 | 70.3 (7.3)<br><br>70.2 (6.2) | Pain (VAS)                                        |
|                                                 | Rannou 2009 <sup>77</sup>         | RCT parallel                            | A: Custom-made thumb orthosis                                                                | A: The orthosis should be used at night- in 12 months                                                                                                                                                   | Short-term<br>Long-term | 57           | CMC, clinical and Rx diagnosis             | 93              | 63.0 (7.9)<br>63.5 (7.6)     | Pain (VAS) at 1 month                             |

29

|                           |                              |                             |                                                                                                                              |                                                                                                                                                                   |                         |                |                                              |                  |                                        |                                                                                     |
|---------------------------|------------------------------|-----------------------------|------------------------------------------------------------------------------------------------------------------------------|-------------------------------------------------------------------------------------------------------------------------------------------------------------------|-------------------------|----------------|----------------------------------------------|------------------|----------------------------------------|-------------------------------------------------------------------------------------|
|                           | Weiss 2004 <sup>81</sup>     | RCT crossover               | A: thumb orthosis immobilising the CMC joint only<br>B: custom-made rigid orthosis immobilizing the wrist, CMC and MCP joint | 1 w with each orthosis without any wash out period before crossing over, (total period = 2w)<br>Orthosis should be used when feeling thumb symptoms, day or night | Short-term              | 25             | C CMC, clinical diagnosis and E-L stage I-II | 84               | Not reported                           | Pain VAS after each w                                                               |
| <b>Assistive devices</b>  |                              |                             |                                                                                                                              |                                                                                                                                                                   |                         |                |                                              |                  |                                        |                                                                                     |
|                           | Kjeken 2011 <sup>82</sup>    | RCT parallel                | A: Assistive devices incl. splint + information<br>B: Information only                                                       | A. 12 w period in which devices should be used as part of activity performance                                                                                    | Long-term               | 35<br>35       | Hand, ACR                                    | 97<br>97         | 61.1 (6.0)<br>59.9 (7.5)               | Occupational performance (COPM)                                                     |
| <b>Thermal modalities</b> |                              |                             |                                                                                                                              |                                                                                                                                                                   |                         |                |                                              |                  |                                        |                                                                                     |
|                           | Dilek 2013 <sup>83</sup>     | RCT parallel                | A: Paraffin bath<br>B: Control                                                                                               | A: 15 min 5 days/w for 3 w, 52°C                                                                                                                                  | Short-term<br>Long-term | 29<br>27       | Hand, ACR                                    | 83<br>90         | 58.9 (9.5)<br>60.0 (8.7)               | Pain (VAS 10 cm) at w 12. Also measured function (AUSCAN) and grip strength (JAMAR) |
|                           | Fiorvanti 2014 <sup>84</sup> | RCT parallel                | A: Mud bath<br>B: Control                                                                                                    | A: 6 sessions of 15 min per w for 2 w, 38-43°C                                                                                                                    | Long-term               | 30<br>30       | Hand, ACR, pain >30 on VAS, and FIHOA≥5      | 93<br>80         | 72.4 (8.3)<br>69.2 (9.9)               | Hand pain (VAS) and function (FIHOA)                                                |
|                           | Horvath 2012 <sup>85</sup>   | RCT parallel (three groups) | A: Pulsed magnetic field therapy (PMFT) + mineral heat bath 38°C**<br>B: PMFT + Mineral heat bath 36°C<br>C: PMFT            | A and B: mineral heat baths 20 min per day, 5 days/w for 3 w<br>All groups received PMFT (60 Hz, 20 J) applied on the hands for 15 min, 3 times/w.                | Short-term<br>Long-term | 21<br>21<br>21 | Hand, ACR<br>hand pain for min 3 months      | 76<br>81<br>85.6 | 62.3 (4.8)<br>63.5 (4.7)<br>63.8 (4.4) | Pain (VAS), grip strength (Saehan dynamometer) and function (HAQ)                   |

|                                 |                                                            |                             |                                                                                                                                                     |                                                                                                                      |                         |                |                                                  |                          |                            |                                                                                    |
|---------------------------------|------------------------------------------------------------|-----------------------------|-----------------------------------------------------------------------------------------------------------------------------------------------------|----------------------------------------------------------------------------------------------------------------------|-------------------------|----------------|--------------------------------------------------|--------------------------|----------------------------|------------------------------------------------------------------------------------|
|                                 | Kasapoğlu Aksoy 2017 <sup>86</sup> (*Kasapoğlu Aksoy 2017) | RCT parallel Pilot study    | A: Hot peloid mud therapy + home exercise program<br>B: Home exercise program                                                                       | A: Peloid mud therapy 47°C, 5x30 min sessions/w for 2 w<br>A and B: Exercises 5 sessions/w for 2 w                   | Short-term              | 33<br>30       | Hand, Rx and VAS pain ≥4                         | 58.2 (9.3)<br>60.6 (8.5) | 96.7<br>88                 | NR. Measured pain (VAS), function (AUSCAN) and grip strength (JAMAR)               |
|                                 | Kovacs 2012 <sup>87</sup>                                  | RCT parallel                | A: Sulphurous thermal spa water<br><br>B: Control – tap water                                                                                       | A and B: 20min x 5/w for 3 w                                                                                         | Long-term               | 24<br>21       | Hand, ACR, KL ≥2 in min 2 joints and ≥3 VAS pain | 95.8<br>90               | 58 (47–71)<br>61 (50–73)   | NR. Measured pain (VAS), function (AUSCAN) and grip strength (Dyna-9 dyna-mometer) |
| <b>Ultrasound/laser therapy</b> |                                                            |                             |                                                                                                                                                     |                                                                                                                      |                         |                |                                                  |                          |                            |                                                                                    |
|                                 | Brosseau 2005 <sup>88</sup>                                | RCT parallel                | A: Low level laser therapy<br>B: Sham laser therapy                                                                                                 | A:: 20 min sessions with J/cm <sup>2</sup> /point x 3/w for 6 w<br>B: Sham therapy 20 min sessions x 3/w for 6 w     | Short-term<br>Long term | 42<br>46       | Hand, ACR, Kallman Rx criteria                   | 73.8<br>82.6             | 64.2 (9.9)<br>65.1 (10.2)  | Pain (AUSCAN), after 3 and 6 w                                                     |
|                                 | Paolillo 2015 <sup>71</sup>                                | RCT parallel (three groups) | A: Low level laser therapy + ultrasound<br>B: Low level laser therapy (diode laser 808 nm) + ultrasound + hand exercises**<br>C: Sham laser therapy | A: diode laser 808 nm 1 session of 15 min/w for 3 months<br>B: Sham laser therapy 1 session of 15 min/w for 3 months | Long-term               | 13<br>13<br>11 | Hand, NR                                         | 100 (sample)             | 69 (5)<br>68 (6)<br>72 (6) | NR. Measured grip strength (JAMAR)                                                 |
| <b>Combination programmes</b>   |                                                            |                             |                                                                                                                                                     |                                                                                                                      |                         |                |                                                  |                          |                            |                                                                                    |
|                                 | Paolillo 2015 <sup>71</sup>                                | RCT parallel                | A: Low level laser therapy (LLLT)(diode laser 808 nm) + ultrasound**<br>B: LLLT (diode laser                                                        | B: diode laser 808 nm 1                                                                                              | Long-term               | 13<br>13       | Hand, NR                                         | 100 (sample)             | 69 (5)<br>68 (6)           | NR. Measured grip strength (JAMAR)                                                 |

|  |                                  |                 |                                                                             |                                                                                                                                                                                                                  |                             |              |                                      |              |                              |                                                      |
|--|----------------------------------|-----------------|-----------------------------------------------------------------------------|------------------------------------------------------------------------------------------------------------------------------------------------------------------------------------------------------------------|-----------------------------|--------------|--------------------------------------|--------------|------------------------------|------------------------------------------------------|
|  |                                  |                 | 808 nm) +<br>ultrasound + hand<br>exercises<br><br>C: Sham laser<br>therapy | session of 15 min/w for 3<br>months. Hand exercises<br>with 1 wly session with 10<br>repetitions per session and<br>increasing load over 3<br>months<br>C: Sham therapy<br>1 session of 15 min/w for 3<br>months |                             | 11           |                                      |              | 72 (6)                       |                                                      |
|  | Stukstette<br>2013 <sup>89</sup> | RCT<br>parallel | A: Joint protection +<br>exercise + education<br><br>B: Education only      | A: 4 group-based sessions<br>and doing hand exercises<br>daily for 12 w<br>B: 30 minutes explanation<br>of written material                                                                                      | Long-term                   | 76<br><br>75 | Hand, ACR                            | 82<br><br>84 | 60,0 (7.0)<br><br>58.0 (9.0) | Function (AUSCAN)<br>and OARSI<br>responders at 12 w |
|  | Villafane<br>2012 <sup>90</sup>  | RCT<br>parallel | A: Manual therapy +<br>exercise<br>B: Sham<br>intervention                  | A and B: Both groups<br>received six sessions over<br>4 w                                                                                                                                                        | Short-term<br><br>Long-term | 30<br><br>30 | CMC, clinical<br>and Rx<br>diagnosis | 90<br><br>80 | 82.0 (2.0)<br><br>83.0 (1.0) | NR. Measured pain<br>sensitivity                     |

\* = Available as abstract only to the 2018 review of Kroon et al (paragraph) – full-text manuscript evaluated for the update. Colours denote RoB (green: low, yellow: some concern, red: high). (A) indicates conference abstract. ACR, American College of Rheumatology; ADLs, activities of daily living; AUSCAN, Australian/Canadian Hand Osteoarthritis Index; CMC, first carpometacarpal joint; CO, cross-over trial; COPM, Canadian Occupational Performance Measure; DASH, Disabilities of the Arm, Shoulder and Hand; DHI, Duruöz Hand Index; DIP, distal interphalangeal joint; E-L, Eaton-Litter; FIHOA, Functional Index for Hand OsteoArthritis; IP, interphalangeal joint; MCP,metacarpophalangeal; MHQ, Michigan Hand Questionnaire; N, number; NR, not reported; NRS, numerical rating scale; OA, osteoarthritis; PO, Primary outcome; qDASH, quick DASH, RCT, randomised controlled trial; RoB, risk of bias; Rx, radiography; SLR, systematic literature review; VAS, visual analogue scale; w, week; WA, wash-out period.



Table 2. Characteristics of studies of studies of pharmacological interventions published up to June 7<sup>th</sup> 2017 that are included in the meta-analyses

| RoB            | Study                            | Design       | Intervention                                                                         | Frequency, duration (instructions)      | Measurement time-points analyzed | N                 | OA location, definition            | Age Y (SD)     | Women (%)                                 | Primary outcome |
|----------------|----------------------------------|--------------|--------------------------------------------------------------------------------------|-----------------------------------------|----------------------------------|-------------------|------------------------------------|----------------|-------------------------------------------|-----------------|
| Topical NSAIDs |                                  |              |                                                                                      |                                         |                                  |                   |                                    |                |                                           |                 |
|                | Altman 2009 <sup>91</sup>        | RCT parallel | A: Topical NSAIDS (diclofenac gel 1%)<br>B: Placebo                                  | A and B: Applied 4 times per day in 8 w | Short-term                       | 198<br>187        | Hand, Rx, KL 1-3                   | 76.8<br>77.0   | 63.6 (10.3)<br>64.7 (9.6)                 | Pain (VAS)      |
|                | Romero 2013 <sup>92</sup>        | RCT parallel | A: Topical NSAIDS (diclofenac gel %)<br>B: Topical Sphaeralcea angutifolia (placebo) | A and B: Applied 3 per day for 7 w      | Short-term                       | 58<br>55          | Hand, ACR                          | 95.3<br>86.1   | 62.0 (10.2) (sample)                      | Function (DFI)  |
|                | Widrig 2007 <sup>93</sup>        | RCT parallel | A: Topical NSAID (ibuprofen cream 5%)<br><br>B: Herbs (placebo)                      | A and B: applied 3x/day for 3 w         | Short-term                       | 85<br>89          | Hand, ACR                          | 61.2<br>66.8   | 64.0 (11.4)<br>64.0 (12.0)                | Pain VAS        |
| Oral NSAIDs    |                                  |              |                                                                                      |                                         |                                  |                   |                                    |                |                                           |                 |
|                | Dreiser et al 1993 <sup>94</sup> | RCT parallel | A: Ibuprofen 800 mg/day<br>B: Placebo                                                | A and B: Daily for 2 w                  | Short term                       | 30<br>30          | Hand, Rx damage, pain exacerbation | 80<br>90       | 58.5 (1.7)<br>60.3 (2.0)                  | NR              |
|                | Grifka et al 2004 <sup>95</sup>  | RCT parallel | A: Lumiracoxib 200 mg/day<br>B: Lumiracoxib 400 mg/day<br>C: Placebo                 | A, B and C: Daily for 4 w               | Short term                       | 205<br>193<br>196 | Hand, ACR                          | 82<br>83<br>83 | 62.0 (12.1)<br>61.0 (12.4)<br>62.7 (11.7) | Pain (VAS)      |

|                                      |                             |                 |                                                                                                                                                |                                                                           |                         |                        |                                                         |                        |                                   |                                                |
|--------------------------------------|-----------------------------|-----------------|------------------------------------------------------------------------------------------------------------------------------------------------|---------------------------------------------------------------------------|-------------------------|------------------------|---------------------------------------------------------|------------------------|-----------------------------------|------------------------------------------------|
|                                      | Seiler 1983 <sup>96</sup>   | RCT<br>parallel | A: Meclofenamate sodium 300 mg/day<br><br>B: Placebo                                                                                           | A and B: Daily for 4 w                                                    | Short term              | 22<br><br>19           | Hand, Clinical diagnosis, ≥1 inflamed DIP and Rx damage | 95<br><br>84           | 62.5 (34–77)<br>65.0 (49–80)      | NR. Measured pain and grip strength            |
| Oral glucocorticoids                 |                             |                 |                                                                                                                                                |                                                                           |                         |                        |                                                         |                        |                                   |                                                |
|                                      | Kvien 2008 <sup>97</sup>    | RCT<br>parallel | A: Prednisone 3 mg/day + dipyridamole 200 mg/<br>B: Placebo                                                                                    | A and B: Daily for 6 w                                                    | Short-term              | 42<br><br>41           | Hand, ACR, Rx KL>1                                      | 93<br><br>93           | 61.1 (5.0)<br>59.6 (5.3)          | Pain (AUSCAN)                                  |
|                                      | Wenham 2012 <sup>98</sup>   | RCT<br>parallel | A: Prednisone 5mg/day<br>B: Placebo                                                                                                            | A and B: Daily for 4 w                                                    | Short-term<br>Long-term | 35<br>35               | Hand, ACR, Rx KL>0                                      | 74<br>89               | 61.9 (6.6)<br>61.1 (9.0)          | Pain (VAS)                                     |
| Intra-articular (IA) glucocorticoids |                             |                 |                                                                                                                                                |                                                                           |                         |                        |                                                         |                        |                                   |                                                |
|                                      | Heyworth 2008 <sup>99</sup> | RCT<br>parallel | A: Glucocorticoids IA 1mL in the CMC-joint<br>B: Hyaluronic acid IA 8mg/1mL**<br>C: Placebo IA (1 mL Saline)                                   | A: Once+1 IA placebo. 2 w<br>B: 1 per w for 2 w<br><br>C: 1 per w for 2 w | Long-term               | 22<br><br>28<br><br>18 | CMC, Rx E-L stage I-IV                                  | 90<br><br>80<br><br>89 | 60 (9.4)<br>65 (10.6)<br>64 (8.5) | NR<br>Measured pain (VAS) and function ((DASH) |
|                                      | Mandl 2012 <sup>100</sup>   | RCT<br>parallel | A: Glucocorticoid IA, 40 mg/1 mL in the CMC joint<br>B: Hyaluronic acid IA. 8 mg/1 mL**<br>C: Placebo (bupivacaine) IA, 1 mL, in the CMC joint | A: Once+1 IA placebo,2 w<br><br>B and C: 1 per w for 2 w                  | Long-term               | 65<br><br>62<br><br>61 | CMC, clinical diagnosis and Rx KL>0                     | 68.0 (total sample)    | 66.5 (45–89) (total sample)       | NR<br>Measured pain (VAS) and function ((DASH) |

|                                    |                                                         |                      |                                                                                                        |                                                                                                             |                             |              |                                              |                              |                                  |                                                                                |
|------------------------------------|---------------------------------------------------------|----------------------|--------------------------------------------------------------------------------------------------------|-------------------------------------------------------------------------------------------------------------|-----------------------------|--------------|----------------------------------------------|------------------------------|----------------------------------|--------------------------------------------------------------------------------|
|                                    | Meenagh 2004 <sup>101</sup>                             | RCT parallel         | A: Glucocorticoid IA, 5 g/0.25 mL in the CMC joint<br>B: Placebo (saline) IA, 0.25 mL in the CMC joint | A and B: Once                                                                                               | Long-term                   | 20<br><br>20 | CMC, NR                                      | 95<br><br>85                 | 60.6 (41–71)<br><br>59.3 (46–69) | Pain (VAS) improvement ≥ 20%                                                   |
| Biological DMARDs (TNF-inhibitors) |                                                         |                      |                                                                                                        |                                                                                                             |                             |              |                                              |                              |                                  |                                                                                |
|                                    | Aitken 2018 <sup>102</sup> *(Aitken 2017)               | RCT cross-over trial | A: Adalimumab 40 mg subcutaneously<br>B: Placebo subcutaneously                                        | A and B: Once per 2 <sup>nd</sup> w for 12 w                                                                | Short-term<br><br>Long-term | 25<br><br>18 | ACR, erosive hand (Rx erosion) MRI synovitis | 63.1 (8.4)<br><br>61.2 (8.4) | 83<br><br>72                     | Pain (VAS) at 12 w                                                             |
|                                    | Chevalier 2015 <sup>103</sup>                           | RCT parallel         | A: Adalimumab 40 mg subcutaneously<br>B: Placebo subcutaneously                                        | A and B: 2 subcutaneous injections at a 15-day interval                                                     | Long-term                   | 42<br><br>43 | Hand, ACR, Rx damage IPs                     | 62.8 (6.9)<br><br>62.2 (7.0) | 87<br><br>83                     | Improvement ≥ 50 % in pain (VAS)                                               |
|                                    | Kloppenburger 2018 <sup>104</sup> *(Kloppenburger 2016) | RCT parallel         | A: Etanercept subcutaneously<br><br>B: Placebo subcutaneously                                          | A: Injection with 50 mg/w for 24 w, thereafter 25 mg/w for 28 w<br>B: Placebo injection once a w for 1 year | Long-term                   | 45<br><br>45 | IP, ACR, erosive (Rx erosion IP)             | 82<br><br>80                 | 59.4 (6.5)<br><br>60.1 (8.7)     | Pain (VAS) at 24 w                                                             |
|                                    | Verbruggen 2012 <sup>105</sup>                          | RCT parallel         | A: Adalimumab 40 mg subcutaneously<br>B: Placebo subcutaneously                                        | A and B: 1 injection every 2 <sup>nd</sup> w for 1 year                                                     | Long-term                   | 30<br><br>30 | IP, ACR, erosive (Rx erosion IP)             | 87<br><br>83                 | 61.9 (6.1)<br><br>60.7 (6.9)     | Reduction in progression of structural damage. Also measured pain and function |

|                                     |                                                    |              |                                                          |                                  |            |     |           |            |    |                            |
|-------------------------------------|----------------------------------------------------|--------------|----------------------------------------------------------|----------------------------------|------------|-----|-----------|------------|----|----------------------------|
|                                     |                                                    |              |                                                          |                                  |            |     |           |            |    | (AUSCAN) and grip strength |
| Synthetic DMARDs (Hydrochloroquine) |                                                    |              |                                                          |                                  |            |     |           |            |    |                            |
|                                     | Kingsbury 2018 <sup>106</sup><br>*(Kingsbury 2016) | RCT parallel | A: Hydroxychloroquine oral 200-400 mg<br>B: Placebo oral | A and B: Once per day for 1 year | Long-term  | 124 | Hand, ACR | 62.8 (9.1) | 78 | Pain (NRS) at 6 months     |
|                                     |                                                    |              |                                                          |                                  |            | 124 |           | 62.5 (9.2) | 85 |                            |
|                                     | Lee 2018 <sup>107</sup><br>*(Basoski 2015)         | RCT parallel | A: Hydroxychloroquine oral 400mg/day<br>B: Placebo oral  | A and B: Once per day for 24 w   | Short-term | 100 | Hand, ACR | 57.7 (8.2) | 88 | Pain (VAS) at 24 w         |
|                                     |                                                    |              |                                                          |                                  | Long-term  | 102 |           | 58.3 (7.0) | 84 |                            |

\* = Available as abstract only to the 2018 review of Kroon et al (paragraph) - full-text manuscript evaluated for the update. \*\*= not included in meta-analyses. Colours denote RoB (green: low, yellow: some concern, red: high). (A) indicates conference abstract. ACR, American College of Rheumatology; ADLs, activities of daily living; AUSCAN, Australian/Canadian Hand Osteoarthritis Index; CMC, first carpometacarpal joint; CO, cross-over trial; DASH, Disabilities of the Arm, Shoulder and Hand; DHI, Duruöz Hand Index; DIP, distal interphalangeal joint; DMARDs, disease modifying anti-rheumatic drugs; E-L, Eaton-Litter; FIHOA, Functional Index for Hand OsteoArthritis; IA, intra-articular; IP, interphalangeal joint; KL, Kellgren-Lawrence; MCP, metacarpophalangeal; MHQ, Michigan Hand Questionnaire; N, number; NR, not reported; NRS, numerical rating scale; OA, osteoarthritis; PO, Primary outcome; qDASH, quick DASH, RCT, randomised controlled trial; RoB, risk of bias; Rx, radiography; VAS, visual analogue scale; w, week; WA, wash-out period.

6. GRADING OF EVIDENCE

6.1 Quality of evidence for hand exercises compared to control for hand osteoarthritis

| Outcomes                           | No of participants (studies)<br>Follow-up | Certainty of the evidence (GRADE) | Relative effect (95% CI)          | Anticipated absolute effects |                                                         |
|------------------------------------|-------------------------------------------|-----------------------------------|-----------------------------------|------------------------------|---------------------------------------------------------|
|                                    |                                           |                                   |                                   | Risk with control            | Risk difference with hand exercises                     |
| Pain (short-term)                  | 182<br>(5 RCTs)                           | ⊕○○○<br>Very low <sup>a,b,c</sup> | -                                 | -                            | SMD <b>0.51 SD lower</b><br>(1.42 lower to 0.4 higher)  |
| Pain (long-term)                   | 262<br>(4 RCTs)                           | ⊕⊕○○<br>Low <sup>d</sup>          | -                                 | -                            | SMD <b>0.34 SD lower</b><br>(0.58 lower to 0.09 lower)  |
| Hand function (short-term)         | 228<br>(3 RCTs)                           | ⊕○○○<br>Very low <sup>a,b,c</sup> | -                                 | -                            | SMD <b>0.86 SD lower</b><br>(2.35 lower to 0.64 higher) |
| Hand function (long-term)          | 364<br>(4 RCTs)                           | ⊕○○○<br>Very low <sup>b,c,d</sup> | -                                 | -                            | SMD <b>0.26 SD lower</b><br>(0.58 lower to 0.05 higher) |
| Grip strength (short-term)         | 105<br>(3 RCTs)                           | ⊕○○○<br>Very low <sup>d,e</sup>   | -                                 | -                            | SMD <b>0.65 SD lower</b><br>(1.15 lower to 0.14 lower)  |
| Grip strength (long-term)          | 263<br>(4 RCTs)                           | ⊕○○○<br>Very low <sup>b,c,d</sup> | -                                 | -                            | SMD <b>0.26 SD lower</b><br>(0.84 lower to 0.32 higher) |
| OMERACT/OARSI response (long-term) | 199<br>(2 RCTs)                           | ⊕○○○<br>Very low <sup>f,g</sup>   | RR <b>3.91</b><br>(1.52 to 10.05) | 118 per 1 000                | <b>342 more per 1 000</b><br>(61 more to 1 065 more)    |

The risk in the intervention group (and its 95% confidence interval) is based on the assumed risk in the comparison group and the relative effect of the intervention (and its 95% CI). **CI:** confidence interval; **SMD:** standardised mean difference.

**Explanations:** a. Combination of high risk and some concerns, b. Large I-squared, c. Broad confidence interval crossing line of zero effect, d. Most studies have high risk of bias, e. Broad confidence interval, f. All studies have high Risk of bias, g. Very broad confidence interval.

6.2. Quality of evidence for proprioceptive hand exercises compared to control for hand osteoarthritis

| Outcomes            | No of participants (studies) Follow-up | Certainty of the evidence (GRADE) | Relative effect (95% CI) | Anticipated absolute effects |                                                         |
|---------------------|----------------------------------------|-----------------------------------|--------------------------|------------------------------|---------------------------------------------------------|
|                     |                                        |                                   |                          | Risk with control            | Risk difference with proprioceptive hand exercises      |
| Pain (short-term)   | 128 (3 RCTs)                           | ⊕○○○<br>Very low <sup>a,b,c</sup> | -                        | -                            | SMD <b>1.38 SD lower</b><br>(2.1 lower to 0.66 lower)   |
| Pain (long-term)    | 155 (4 RCTs)                           | ⊕○○○<br>Very low <sup>a,b,d</sup> | -                        | -                            | SMD <b>0.71 SD lower</b><br>(2.08 lower to 0.65 higher) |
| Function short-term | 130 (3 RCTs)                           | ⊕○○○<br>Very low <sup>a,b,e</sup> | -                        | -                            | SMD <b>1.24 SD lower</b><br>(2.69 lower to 0.21 higher) |
| Function long-term  | 143 (3 RCTs)                           | ⊕○○○<br>Very low <sup>a,b,d</sup> | -                        | -                            | SMD <b>0.74 SD lower</b><br>(1.73 lower to 0.24 higher) |

The risk in the intervention group (and its 95% confidence interval) is based on the assumed risk in the comparison group and the relative effect of the intervention (and its 95% CI). **CI:** confidence interval; **SMD:** standardised mean difference.

**Explanations:** a. Combination of high risk and some concerns, b. Large I-squared, c. Broad confidence interval crossing line of zero effect, d. Most studies have high risk of bias, e. Broad confidence interval, f. All studies have high Risk of bias, g. Very broad confidence interval.

6.3. Quality of evidence for thumb orthoses compared to no thumb orthoses for hand osteoarthritis

| Outcomes                                    | No of participants (studies) Follow-up | Certainty of the evidence (GRADE) | Relative effect (95% CI)         | Anticipated absolute effects |                                                          |
|---------------------------------------------|----------------------------------------|-----------------------------------|----------------------------------|------------------------------|----------------------------------------------------------|
|                                             |                                        |                                   |                                  | Risk with no orthoses        | Risk difference with orthoses                            |
| Pain (short-term)                           | 535 (7 RCTs)                           | ⊕○○○<br>Very low <sup>a,b,c</sup> | -                                | -                            | SMD <b>0.04 SD higher</b><br>(0.68 lower to 0.77 higher) |
| Pain (long-term)                            | 137 (2 RCTs)                           | ⊕⊕○○<br>Low <sup>d</sup>          | -                                | -                            | SMD <b>0.77 SD lower</b><br>(1.2 lower to 0.34 lower)    |
| Hand function (short-term)                  | 435 (6 RCTs)                           | ⊕○○○<br>Very low <sup>a,b,c</sup> | -                                | -                            | SMD <b>0.41 SD higher</b><br>(0.88 lower to 1.71 higher) |
| Hand function (long-term)                   | 40 (1 RCT)                             | ⊕○○○<br>Very low <sup>c,d</sup>   | -                                | -                            | SMD <b>0.42 SD lower</b><br>(1.03 lower to 0.2 higher)   |
| Grip strength (short-term)                  | 158 (3 RCTs)                           | ⊕○○○<br>Very low <sup>d,e</sup>   | -                                | -                            | SMD <b>0.33 SD lower</b><br>(0.65 lower to 0.02 lower)   |
| Grip strength (long-term)                   | 40 (1 RCT)                             | ⊕○○○<br>Very low <sup>d,f</sup>   | -                                | -                            | SMD <b>0.13 SD lower</b><br>(0.73 lower to 0.48 higher)  |
| All adverse events (long-term)              | 145 (2 RCTs)                           | ⊕○○○<br>Very low <sup>d,g</sup>   | <b>RR 2.32</b><br>(0.66 to 8.10) | 42 per 1 000                 | <b>56 more per 1 000</b><br>(14 fewer to 300 more)       |
| Withdrawals from adverse events (long-term) | 142 (2 RCTs)                           | ⊕○○○<br>Very low <sup>d,g</sup>   | <b>RR 0.98</b><br>(0.10 to 9.15) | 14 per 1 000                 | <b>0 fewer per 1 000</b><br>(13 fewer to 116 more)       |

The risk in the intervention group (and its 95% confidence interval) is based on the assumed risk in the comparison group and the relative effect of the intervention (and its 95% CI). **CI:** confidence interval; **SMD:** standardised mean difference.

**Explanations:** a. Combination of high risk and some concerns, b. Large I-squared, c. Broad confidence interval crossing line of zero effect, d. Most studies have high risk of bias, e. Broad confidence interval, f. All studies have high Risk of bias, g. Very broad confidence interval.

6.4. Quality of evidence for thumb orthoses immobilising the CMC-joint only against orthoses also immobilising the wrist and/or more additional thumb joints

| Outcomes                   | № of participants (studies)<br>Follow-up | Certainty of the evidence (GRADE) | Relative effect (95% CI) | Anticipated absolute effects |                                                           |
|----------------------------|------------------------------------------|-----------------------------------|--------------------------|------------------------------|-----------------------------------------------------------|
|                            |                                          |                                   |                          | Risk with CMC orthoses       | Risk difference with wrist/MCP orthoses                   |
| Pain (short-term)          | 357<br>(6 RCTs)                          | ⊕○○○<br>Very low <sup>a,b,c</sup> | -                        | -                            | SMD <b>0.63 SD lower</b><br>(1.57 lower to 0.31 higher)   |
| Pain (long-term)           | 84<br>(1 RCT)                            | ⊕○○○<br>Very low <sup>b,c,d</sup> | -                        | -                            | SMD <b>0.91 SD higher</b><br>(0.47 higher to 1.36 higher) |
| Hand function (short-term) | 184<br>(3 RCTs)                          | ⊕○○○<br>Very low <sup>c,e</sup>   | -                        | -                            | SMD <b>0.1 SD lower</b><br>(0.56 lower to 0.37 higher)    |
| Hand function (long-term)  | 84<br>(1 RCT)                            | ⊕○○○<br>Very low <sup>b,e</sup>   | -                        | -                            | SMD <b>1.14 SD higher</b><br>(0.68 higher to 1.59 higher) |

The risk in the intervention group (and its 95% confidence interval) is based on the assumed risk in the comparison group and the relative effect of the intervention (and its 95% CI). **CI:** confidence interval; **SMD:** standardised mean difference.

**Explanations:** a. Combination of high risk and some concerns, b. Large I-squared, c. Broad confidence interval crossing line of zero effect, d. Most studies have high risk of bias, e. Broad confidence interval, f. All studies have high Risk of bias, g. Very broad confidence interval.



6.5. Quality of evidence for assistive devices compared to control according to the GRADE approach

| Outcomes                   | No of participants (studies) Follow-up | Certainty of the evidence (GRADE) | Relative effect (95% CI) | Anticipated absolute effects |                                                         |
|----------------------------|----------------------------------------|-----------------------------------|--------------------------|------------------------------|---------------------------------------------------------|
|                            |                                        |                                   |                          | Risk with control            | Risk difference with assistive devices                  |
| Pain (short-term)          | 38 (1 RCT)                             | ⊕⊕○○<br>Low <sup>a,b</sup>        | -                        | -                            | SMD <b>0.3 SD lower</b><br>(0.93 lower to 0.33 higher)  |
| Pain (long-term)           | 103 (2 RCTs)                           | ⊕⊕○○<br>Low <sup>b,c</sup>        | -                        | -                            | SMD <b>0.24 SD lower</b><br>(0.63 lower to 0.14 higher) |
| Hand function (short-term) | 38 (1 RCT)                             | ⊕⊕○○<br>Low <sup>a,b</sup>        | -                        | -                            | SMD <b>0.07 SD lower</b><br>(0.69 lower to 0.56 higher) |
| Hand function (long-term)  | 103 (2 RCTs)                           | ⊕⊕⊕○<br>Moderate <sup>c</sup>     | -                        | -                            | SMD <b>0.55 SD lower</b><br>(0.94 lower to 0.16 lower)  |

The risk in the intervention group (and its 95% confidence interval) is based on the assumed risk in the comparison group and the relative effect of the intervention (and its 95% CI). **CI:** confidence interval; **SMD:** standardised mean difference.

**Explanations:** a. Combination of high risk and some concerns, b. Large I-squared, c. Broad confidence interval crossing line of zero effect, d. Most studies have high risk of bias, e. Broad confidence interval, f. All studies have high Risk of bias, g. Very broad confidence interval.

6.6. Quality of evidence for thermal modalities compared to control according to the GRADE approach

|                            | № of participants (studies)<br>Follow-up | Certainty of the evidence (GRADE) | Relative effect (95% CI) | Anticipated absolute effects |                                                          |
|----------------------------|------------------------------------------|-----------------------------------|--------------------------|------------------------------|----------------------------------------------------------|
|                            |                                          |                                   |                          | Risk with control            | Risk difference with thermal modalities                  |
| Pain (short-term)          | 318 (6 RCTs)                             | ⊕○○○<br>Very low <sup>a,b</sup>   | -                        | -                            | SMD <b>0.87 SD lower</b><br>(1.26 lower to 0.48 lower)   |
| Pain (long-term)           | 193 (4 RCTs)                             | ⊕○○○<br>Very low <sup>b,c,d</sup> | -                        | -                            | SMD <b>0.88 SD lower</b><br>(1.17 lower to 0.59 lower)   |
| Hand function (short-term) | 46 (1 RCT)                               | ⊕○○○<br>Very low <sup>a,e</sup>   | -                        | -                            | SMD <b>0.12 SD lower</b><br>(0.69 lower to 0.45 higher)  |
| Hand function (long-term)  | 151 (3 RCTs)                             | ⊕⊕○○<br>Low <sup>d,f</sup>        | -                        | -                            | SMD <b>0.78 SD lower</b><br>(1.16 lower to 0.4 lower)    |
| Grip strength (short-term) | 201 (4 RCTs)                             | ⊕○○○<br>Very low <sup>a,g,h</sup> | -                        | -                            | SMD <b>0.38 SD lower</b><br>(0.87 lower to 0.1 higher)   |
| Grip strength (long-term)  | 87 (2 RCTs)                              | ⊕○○○<br>Very low <sup>a,g,i</sup> | -                        | -                            | SMD <b>0.13 SD higher</b><br>(1.11 lower to 1.37 higher) |

The risk in the intervention group (and its 95% confidence interval) is based on the assumed risk in the comparison group and the relative effect of the intervention (and its 95% CI). **CI**: confidence interval; **SMD**: standardised mean difference.

**Explanations:** a. Combination of high risk and some concerns, b. Large I-squared, c. Broad confidence interval crossing line of zero effect, d. Most studies have high risk of bias, e. Broad confidence interval, f. All studies have high Risk of bias, g. Very broad confidence interval.

6. 7. Quality of evidence for ultrasound/laser therapy compared to control according to the GRADE approach

| Outcomes                   | No of participants (studies) Follow-up | Certainty of the evidence (GRADE) | Relative effect (95% CI) | Anticipated absolute effects |                                                          |
|----------------------------|----------------------------------------|-----------------------------------|--------------------------|------------------------------|----------------------------------------------------------|
|                            |                                        |                                   |                          | Risk with control            | Risk difference with ultrasound/laser therapy            |
| Pain (short-term)          | 129 (2 RCTs)                           | ⊕○○○<br>Very low <sup>a,b,c</sup> | -                        | -                            | SMD <b>0.39 SD lower</b><br>(1.32 lower to 0.53 higher)  |
| Pain (long-term)           | 141 (2 RCTs)                           | ⊕⊕○○<br>Low <sup>d,e</sup>        | -                        | -                            | SMD <b>0.08 SD higher</b><br>(0.24 lower to 0.41 higher) |
| Grip strength (short-term) | 86 (1 RCT)                             | ⊕⊕⊕○<br>Moderate <sup>e</sup>     | -                        | -                            | SMD <b>0.09 SD lower</b><br>(0.51 lower to 0.33 higher)  |
| Grip strength (long-term)  | 110 (2 RCTs)                           | ⊕⊕○○<br>Low <sup>a,e</sup>        | -                        | -                            | SMD <b>0.13 SD lower</b><br>(0.5 lower to 0.24 higher)   |

The risk in the intervention group (and its 95% confidence interval) is based on the assumed risk in the comparison group and the relative effect of the intervention (and its 95% CI). **CI**: confidence interval; **SMD**: standardised mean difference.

**Explanations:** a. Combination of high risk and some concerns, b. Large I-squared, c. Broad confidence interval crossing line of zero effect, d. Most studies have high risk of bias, e. Broad confidence interval, f. All studies have high Risk of bias, g. Very broad confidence interval.

6.8. Quality of evidence for combination therapies compared to control according to the GRADE approach

| Outcomes                       | No of participants (studies)<br>Follow-up | Certainty of the evidence (GRADE) | Relative effect (95% CI)   | Anticipated absolute effects |                                                   |
|--------------------------------|-------------------------------------------|-----------------------------------|----------------------------|------------------------------|---------------------------------------------------|
|                                |                                           |                                   |                            | Risk with control            | Risk difference with combination therapies        |
| Pain, short-term               | 188<br>(2 RCTs)                           | ⊕○○○<br>Very low <sup>a,b,c</sup> | -                          | -                            | SMD 5.86 SD lower<br>(17.04 lower to 5.32 higher) |
| Pain, long-term                | 376<br>(3 RCTs)                           | ⊕○○○<br>Very low <sup>b,c,d</sup> | -                          | -                            | SMD 3.83 SD lower<br>(10.96 lower to 3.29 higher) |
| Function, long-term            | 316<br>(2 RCTs)                           | ⊕○○○<br>Very low <sup>b,c,e</sup> | -                          | -                            | SMD 0.3 SD lower<br>(0.82 lower to 0.23 higher)   |
| Grip-strength, long-term       | 340<br>(3 RCTs)                           | ⊕○○○<br>Very low <sup>d,f,g</sup> | -                          | -                            | SMD 0.08 SD lower<br>(0.47 lower to 0.32 higher)  |
| All adverse events, short-term | 60<br>(1 RCT)                             | ⊕○○○<br>Very low <sup>a,h</sup>   | RR 1.00<br>(0.02 to 48.82) | 0 per 1 000                  | 0 fewer per 1 000<br>(0 fewer to 0 fewer)         |
| All adverse events, long-term  | 151<br>(1 RCT)                            | ⊕○○○<br>Very low <sup>a,c</sup>   | RR 2.92<br>(0.12 to 70.64) | 0 per 1 000                  | 0 fewer per 1 000<br>(0 fewer to 0 fewer)         |

The risk in the intervention group (and its 95% confidence interval) is based on the assumed risk in the comparison group and the relative effect of the intervention (and its 95% CI). **CI:** confidence interval; **SMD:** standardised mean difference.

**Explanations:** a. Combination of high risk and some concerns, b. Large I-squared, c. Broad confidence interval crossing line of zero effect, d. Most studies have high risk of bias, e. Broad confidence interval, f. All studies have high Risk of bias, g. Very broad confidence interval.

6.9. Quality of evidence for topical NSAIDs compared to control according to the GRADE approach

| Outcomes                  | No of participants (studies) Follow-up | Certainty of the evidence (GRADE) | Relative effect (95% CI) | Anticipated absolute effects |                                                         |
|---------------------------|----------------------------------------|-----------------------------------|--------------------------|------------------------------|---------------------------------------------------------|
|                           |                                        |                                   |                          | Risk with control            | Risk difference with topical NSAIDs                     |
| Pain, short-term          | 572 (2 RCTs)                           | ⊕⊕○○<br>Low <sup>a,b</sup>        | -                        | -                            | SMD <b>0.07 SD lower</b><br>(0.37 lower to 0.24 higher) |
| Hand function, short-term | 713 (3 RCTs)                           | ⊕⊕⊕⊕<br>High                      | -                        | -                            | SMD <b>0.17 SD lower</b><br>(0.33 lower to 0.01 lower)  |

The risk in the intervention group (and its 95% confidence interval) is based on the assumed risk in the comparison group and the relative effect of the intervention (and its 95% CI). **CI:** confidence interval; **SMD:** standardised mean difference.

**Explanations:** a. Combination of high risk and some concerns, b. Large I-squared, c. Broad confidence interval crossing line of zero effect, d. Most studies have high risk of bias, e. Broad confidence interval, f. All studies have high Risk of bias, g. Very broad confidence interval.

6.10. Quality of evidence for oral NSAIDs compared to control according to the GRADE approach

| Outcomes                          | № of participants (studies) Follow-up | Certainty of the evidence (GRADE) | Relative effect (95% CI)       | Anticipated absolute effects |                                                      |
|-----------------------------------|---------------------------------------|-----------------------------------|--------------------------------|------------------------------|------------------------------------------------------|
|                                   |                                       |                                   |                                | Risk with placebo            | Risk difference with oral NSAIDs                     |
| Pain, short-term                  | 461 (2 RCTs)                          | ⊕⊕○○<br>Low <sup>a, e</sup>       | -                              | -                            | SMD <b>0.22 SD lower</b> (0.67 lower to 0.23 higher) |
| All adverse events                | 695 (3 RCTs)                          | ⊕⊕⊕⊕<br>High                      | RR <b>1.03</b> (0.76 to 1.41)  | 176 per 1 000                | <b>5 more per 1 000</b> (42 fewer to 72 more)        |
| Severe adverse events, short-term | 654 (2 RCTs)                          | ⊕⊕○○<br>Low <sup>c</sup>          | RR <b>0.70</b> (0.04 to 11.12) | 0 per 1 000                  | <b>0 fewer per 1 000</b> (0 fewer to 0 fewer)        |
| Withdrawal from adverse events    | 695 (3 RCTs)                          | ⊕⊕○○<br>Low <sup>c</sup>          | RR <b>1.82</b> (0.71 to 4.67)  | 12 per 1 000                 | <b>10 more per 1 000</b> (4 fewer to 45 more)        |
| Gastrointestinal adverse events   | 615 (2 RCTs)                          | ⊕⊕⊕○<br>Moderate <sup>b</sup>     | RR <b>1.45</b> (0.83 to 2.53)  | 77 per 1 000                 | <b>35 more per 1 000</b> (13 fewer to 118 more)      |

The risk in the intervention group (and its 95% confidence interval) is based on the assumed risk in the comparison group and the relative effect of the intervention (and its 95% CI). **CI**: confidence interval; **SMD**: standardised mean difference.

**Explanations:** a. Combination of high risk and some concerns, b. Large I-squared, c. Broad confidence interval crossing line of zero effect, d. Most studies have high risk of bias, e. Broad confidence interval, f. All studies have high Risk of bias, g. Very broad confidence interval.

6.11. Quality of evidence for oral glucocorticoids compared to control according to the GRADE approach

| Outcomes             | No of participants (studies)<br>Follow-up | Certainty of the evidence (GRADE) | Relative effect (95% CI) | Anticipated absolute effects |                                                          |
|----------------------|-------------------------------------------|-----------------------------------|--------------------------|------------------------------|----------------------------------------------------------|
|                      |                                           |                                   |                          | Risk with placebo            | Risk difference with oral glucocorticoids                |
| Pain, short-term     | 245 (3 RCTs)                              | ⊕○○○<br>Very low <sup>a,b</sup>   | -                        | -                            | SMD <b>1.44 SD lower</b><br>(3.63 lower to 0.74 higher)  |
| Pain, long-term      | 67 (1 RCT)                                | ⊕⊕○○<br>Low <sup>b</sup>          | -                        | -                            | SMD <b>0.12 SD higher</b><br>(0.36 lower to 0.59 higher) |
| Function, short-term | 245 (3 RCTs)                              | ⊕⊕⊕○<br>Moderate <sup>c</sup>     | -                        | -                            | SMD <b>0.35 SD lower</b><br>(0.64 lower to 0.07 lower)   |
| Function, long-term  | 67 (1 RCT)                                | ⊕⊕○○<br>Low <sup>b</sup>          | -                        | -                            | SMD <b>0.11 SD lower</b><br>(0.58 lower to 0.37 higher)  |

The risk in the intervention group (and its 95% confidence interval) is based on the assumed risk in the comparison group and the relative effect of the intervention (and its 95% CI). **CI:** confidence interval; **SMD:** standardised mean difference.

**Explanations:** a. Combination of high risk and some concerns, b. Large I-squared, c. Broad confidence interval crossing line of zero effect, d. Most studies have high risk of bias, e. Broad confidence interval, f. All studies have high Risk of bias, g. Very broad confidence interval.

6.12. Quality of evidence for intra-articular glucocorticoids compared to control according to the GRADE approach

| Outcomes                      | No of participants (studies)<br>Follow-up | Certainty of the evidence (GRADE) | Relative effect (95% CI)  | Anticipated absolute effects |                                                     |
|-------------------------------|-------------------------------------------|-----------------------------------|---------------------------|------------------------------|-----------------------------------------------------|
|                               |                                           |                                   |                           | Risk with placebo            | Risk difference with intraarticular glucocorticoids |
| Pain, long-term               | 166<br>(2 RCTs)                           | ⊕○○○<br>Very low <sup>a,b,c</sup> | -                         | -                            | SMD 0.17 SD lower<br>(0.69 lower to 0.35 higher)    |
| All adverse events, long-term | 206<br>(3 RCTs)                           | ⊕○○○<br>Very low <sup>a,d</sup>   | RR 2.31<br>(0.74 to 7.26) | 30 per 1 000                 | 40 more per 1 000<br>(8 fewer to 190 more)          |

The risk in the intervention group (and its 95% confidence interval) is based on the assumed risk in the comparison group and the relative effect of the intervention (and its 95% CI). **CI:** confidence interval; **SMD:** standardised mean difference.

**Explanations:** a. Combination of high risk and some concerns, b. Large I-squared, c. Broad confidence interval crossing line of zero effect, d. Most studies have high risk of bias, e. Broad confidence interval, f. All studies have high Risk of bias, g. Very broad confidence interval.



6.13. Quality of evidence for biological disease-modifying anti-rheumatic drugs (bDMARDs)/TNF-inhibitors compared to placebo according to the GRADE approach

| Outcomes                                  | No of participants (studies) Follow-up | Certainty of the evidence (GRADE) | Relative effect (95% CI)  | Anticipated absolute effects |                                                 |
|-------------------------------------------|----------------------------------------|-----------------------------------|---------------------------|------------------------------|-------------------------------------------------|
|                                           |                                        |                                   |                           | Risk with placebo            | Risk difference with DMARDs/TNF-inhibitors      |
| Pain, long-term                           | 226 (3 RCTs)                           | ⊕○○○<br>Very low <sup>a,b,c</sup> | -                         | -                            | SMD 0.04 SD lower<br>(0.38 lower to 0.3 higher) |
| All adverse events, long-term             | 316 (4 RCTs)                           | ⊕⊕⊕○<br>Moderate <sup>a</sup>     | RR 0.95<br>(0.79 to 1.15) | 513 per 1 000                | 26 fewer per 1 000<br>(108 fewer to 77 more)    |
| Severe adverse events, long-term          | 312 (4 RCTs)                           | ⊕○○○<br>Very low <sup>a,d</sup>   | RR 0.95<br>(0.26 to 3.44) | 26 per 1 000                 | 1 fewer per 1 000<br>(19 fewer to 63 more)      |
| Withdrawal from adverse events, long-term | 312 (4 RCTs)                           | ⊕○○○<br>Very low <sup>a,d</sup>   | RR 1.98<br>(0.63 to 6.19) | 26 per 1 000                 | 25 more per 1 000<br>(10 fewer to 135 more)     |

The risk in the intervention group (and its 95% confidence interval) is based on the assumed risk in the comparison group and the relative effect of the intervention (and its 95% CI). **CI:** confidence interval; **SMD:** standardised mean difference.

**Explanations:** a. Combination of high risk and some concerns, b. Large I-squared, c. Broad confidence interval crossing line of zero effect, d. Most studies have high risk of bias, e. Broad confidence interval, f. All studies have high Risk of bias, g. Very broad confidence interval.

6.14. Quality of evidence for synthetic DMARDs anti-rheumatic drugs (Hydroxychloroquine) according to the GRADE approach

| Outcomes                      | № of participants (studies) Follow-up | Certainty of the evidence (GRADE) | Relative effect (95% CI)         | Anticipated absolute effects |                                                         |
|-------------------------------|---------------------------------------|-----------------------------------|----------------------------------|------------------------------|---------------------------------------------------------|
|                               |                                       |                                   |                                  | Risk with control            | Risk difference with Hydroxychloroquine                 |
| Pain, short-term              | 196 (1 RCT)                           | ⊕⊕○○<br>Low <sup>a,b</sup>        | -                                | -                            | SMD <b>0.08 SD higher</b><br>(0.2 lower to 0.36 higher) |
| Pain, long-term               | 540 (3 RCTs)                          | ⊕⊕⊕○<br>Moderate <sup>c</sup>     | -                                | -                            | SMD <b>0.01 SD lower</b><br>(0.18 lower to 0.16 higher) |
| Function, long-term           | 349 (2 RCTs)                          | ⊕○○○<br>Very low <sup>c,d</sup>   | -                                | -                            | SMD <b>0.03 SD lower</b><br>(0.24 lower to 0.18 higher) |
| All adverse events, long-term | 361 (2 RCTs)                          | ⊕○○○<br>Very low <sup>c,e</sup>   | <b>RR 0.66</b><br>(0.35 to 1.24) | 124 per 1 000                | <b>42 fewer per 1 000</b><br>(81 fewer to 30 more)      |

The risk in the intervention group (and its 95% confidence interval) is based on the assumed risk in the comparison group and the relative effect of the intervention (and its 95% CI). **CI:** confidence interval; **SMD:** standardised mean difference.

**Explanations:** a. Combination of high risk and some concerns, b. Large I-squared, c. Broad confidence interval crossing line of zero effect, d. Most studies have high risk of bias, e. Broad confidence interval, f. All studies have high Risk of bias, g. Very broad confidence interval.

6.15. Quality of evidence for Methotrexate compared to placebo according to the GRADE approach

| Outcomes           | № of participants (studies) Follow-up | Certainty of the evidence (GRADE) | Relative effect (95% CI)         | Anticipated absolute effects |                                                         |
|--------------------|---------------------------------------|-----------------------------------|----------------------------------|------------------------------|---------------------------------------------------------|
|                    |                                       |                                   |                                  | Risk with placebo            | Risk difference with Methotrexate                       |
| Pain (long-term)   | 161 (2 RCTs)                          | ⊕⊕○○<br>Low <sup>a,b</sup>        | -                                | -                            | SMD <b>0.31 SD lower</b><br>(0.61 lower to 0 )          |
| Function long-term | 144 (2 RCTs)                          | ⊕⊕○○<br>Low <sup>a,c</sup>        | -                                | -                            | SMD <b>0.17 SD lower</b><br>(0.49 lower to 0.15 higher) |
| All adverse events | 161 (2 RCTs)                          | ⊕○○○<br>Very low <sup>a,d</sup>   | <b>RR 0.80</b><br>(0.37 to 1.73) | 468 per 1 000                | <b>94 fewer per 1 000</b><br>(295 fewer to 342 more)    |

The risk in the intervention group (and its 95% confidence interval) is based on the assumed risk in the comparison group and the relative effect of the intervention (and its 95% CI). **CI:** confidence interval; **SMD:** standardised mean difference.

**Explanations:** a. Combination of high risk and some concerns, b. Large I-squared, c. Broad confidence interval crossing line of zero effect, d. Most studies have high risk of bias, e. Broad confidence interval, f. All studies have high Risk of bias, g. Very broad confidence interval.

6.16. Quality of evidence for Colchicine compared to placebo according to the GRADE approach

| Outcomes           | № of participants (studies) Follow-up | Certainty of the evidence (GRADE) | Relative effect (95% CI)  | Anticipated absolute effects |                                                   |
|--------------------|---------------------------------------|-----------------------------------|---------------------------|------------------------------|---------------------------------------------------|
|                    |                                       |                                   |                           | Risk with placebo            | Risk difference with Colchicine                   |
| Pain               | 156 (2 RCTs)                          | ⊕○○○<br>Very low <sup>a,b</sup>   | -                         | -                            | SMD 0.09 SD higher<br>(0.22 lower to 0.41 higher) |
| Function           | 156 (2 RCTs)                          | ⊕○○○<br>Very low <sup>a,c</sup>   | -                         | -                            | SMD 0.09 SD lower<br>(0.4 lower to 0.23 higher)   |
| Grip strength      | 156 (2 RCTs)                          | ⊕○○○<br>Very low <sup>a,b</sup>   | -                         | -                            | SMD 0.13 SD higher<br>(0.18 lower to 0.45 higher) |
| All adverse events | 164 (2 RCTs)                          | ⊕⊕⊕○<br>Moderate <sup>a</sup>     | RR 1.70<br>(1.27 to 2.28) | 415 per 1 000                | 290 more per 1 000<br>(112 more to 531 more)      |

The risk in the intervention group (and its 95% confidence interval) is based on the assumed risk in the comparison group and the relative effect of the intervention (and its 95% CI). **CI:** confidence interval; **SMD:** standardised mean difference.

**Explanations:** a. Combination of high risk and some concerns, b. Large I-squared, c. Broad confidence interval crossing line of zero effect, d. Most studies have high risk of bias, e. Broad confidence interval, f. All studies have high Risk of bias, g. Very broad confidence interval.

7. FOREST PLOTS

5.1. Exercises

Figure S1. Forest plot of hand exercises versus usual care or no intervention: short- and long-term pain

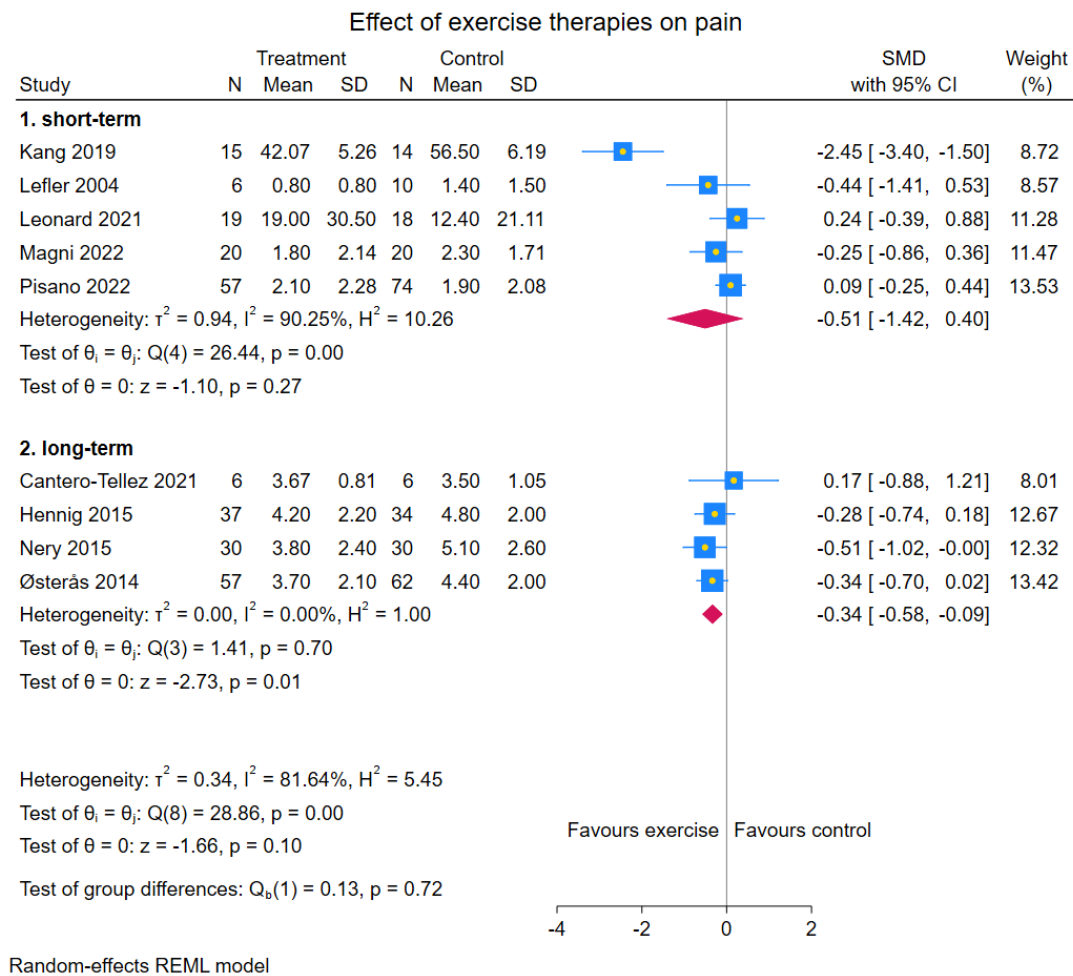

**Figure S2.** Forest plot of hand exercises versus usual care or no intervention: short- and long-term function

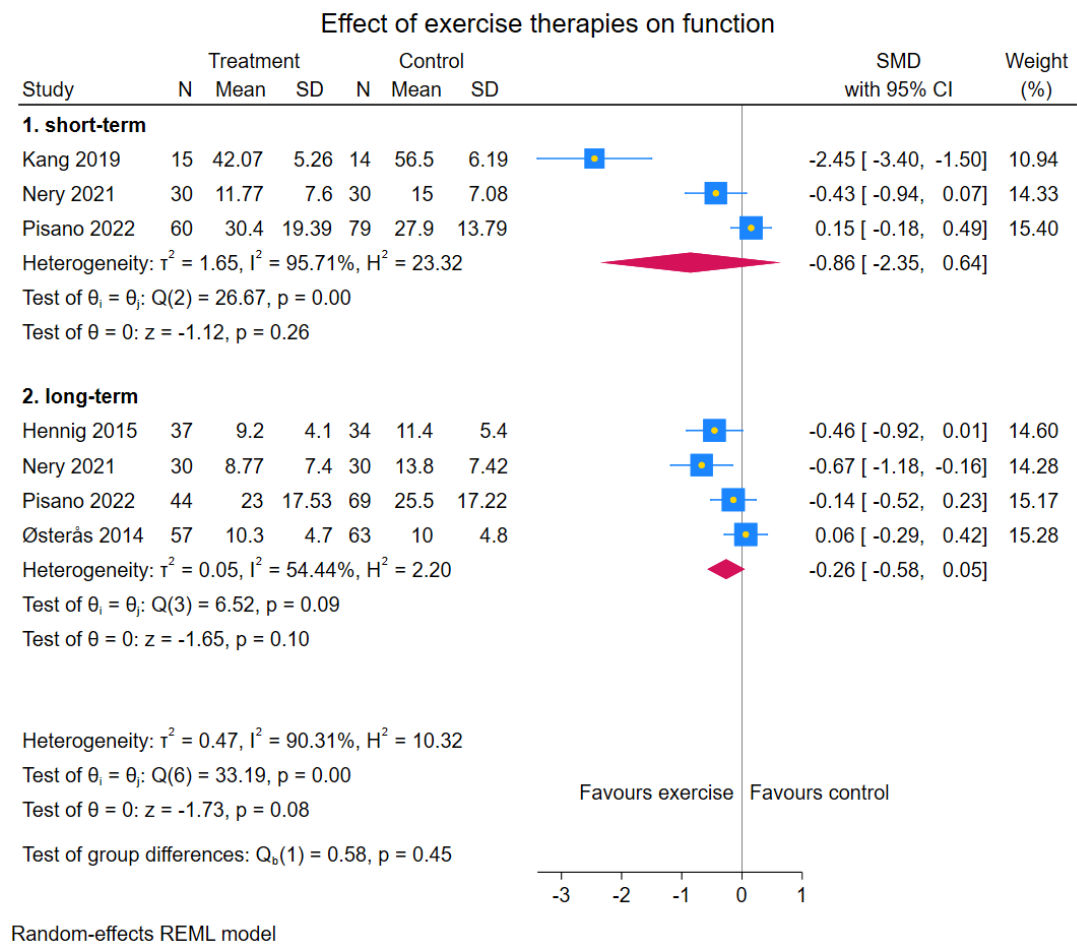

**Figure S3.** Forest plot of hand exercises versus usual care or no intervention: short- and long-term grip strength

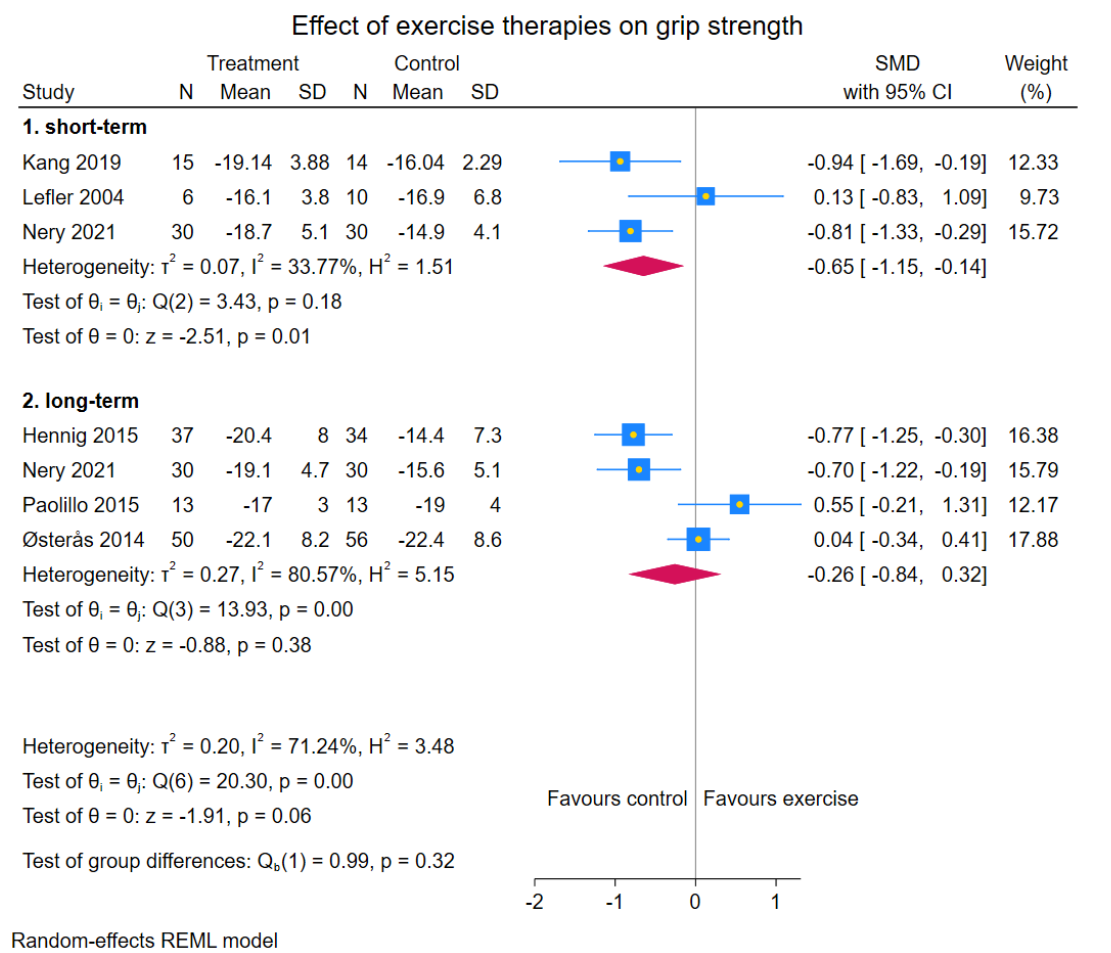

**Figure S4.** Forest plot of hand exercises versus usual care or no intervention: long-term OMERACT-OARSI response

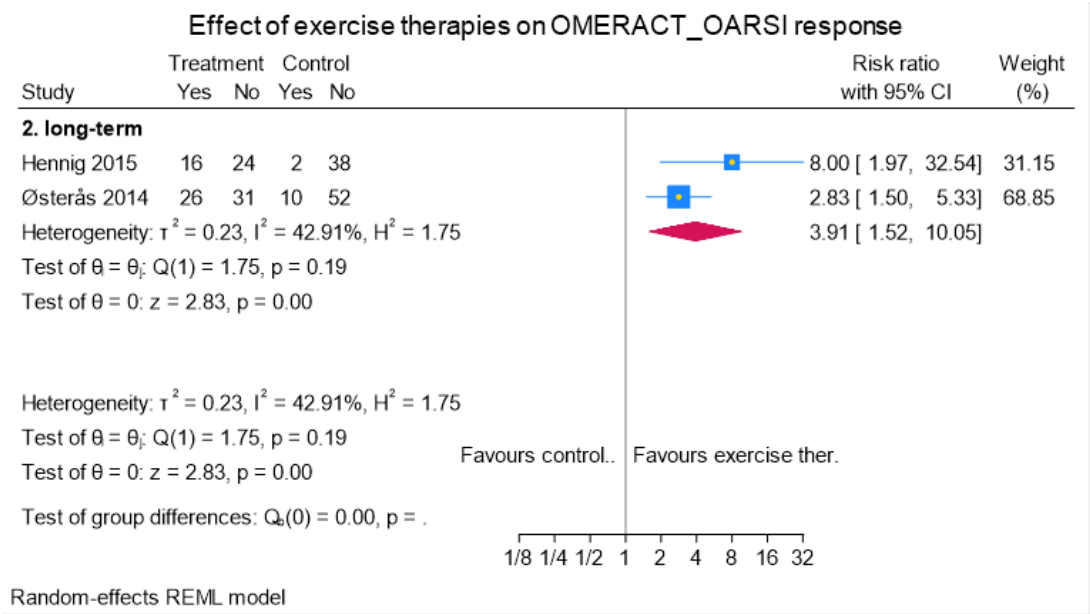



**Figure S5.** Forest plot of hand exercises versus hand exercises + proprioceptive exercises: short- and long-term pain

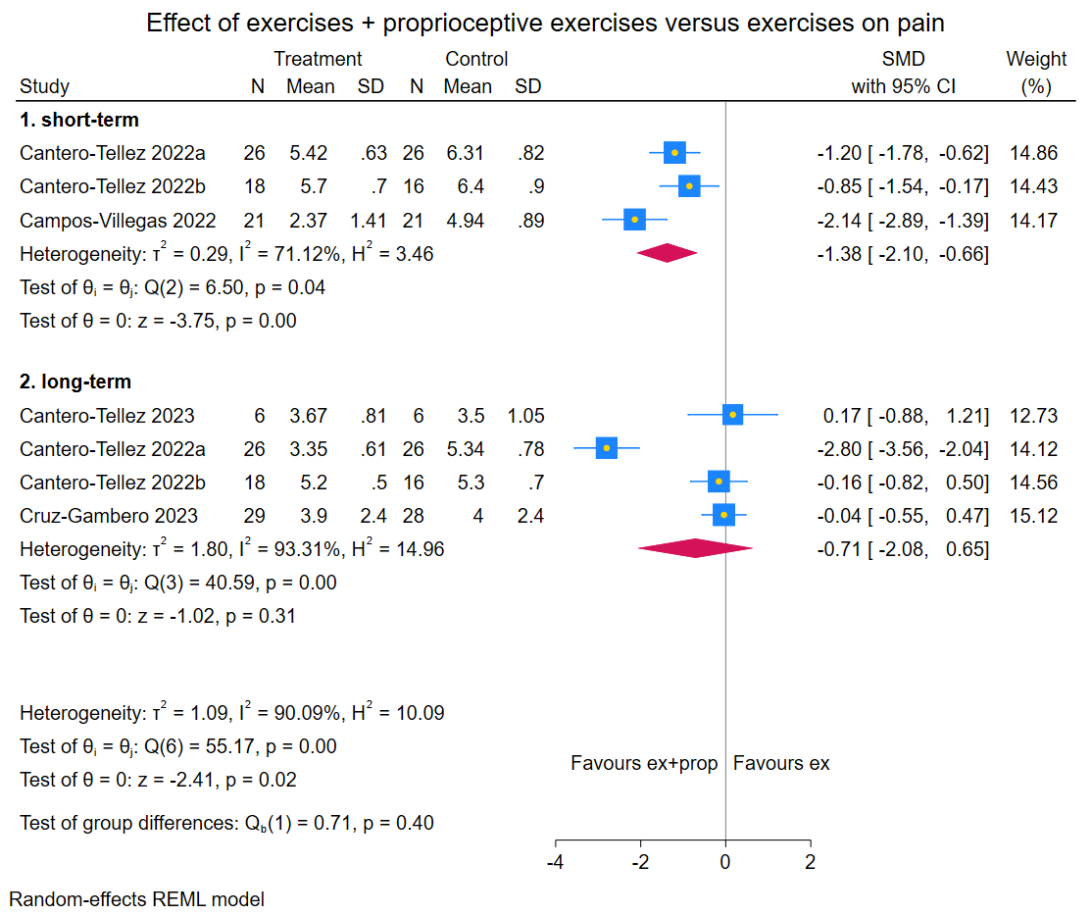

**Figure S6.** Forest plot of hand exercises versus hand exercises + proprioceptive exercises: short- and long-term function

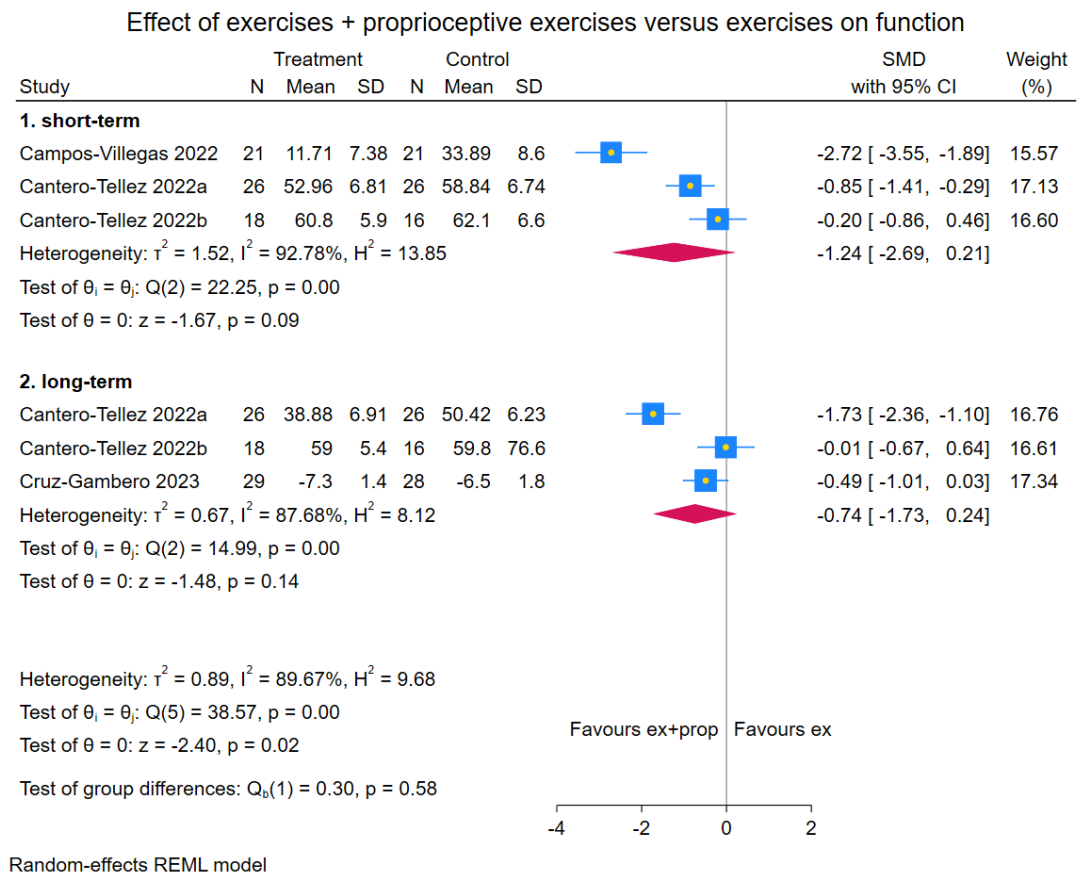

5.2. Orthoses

Figure S7. Forest plot of thumb orthoses vs. no thumb orthoses or placebo: short- and long-term pain

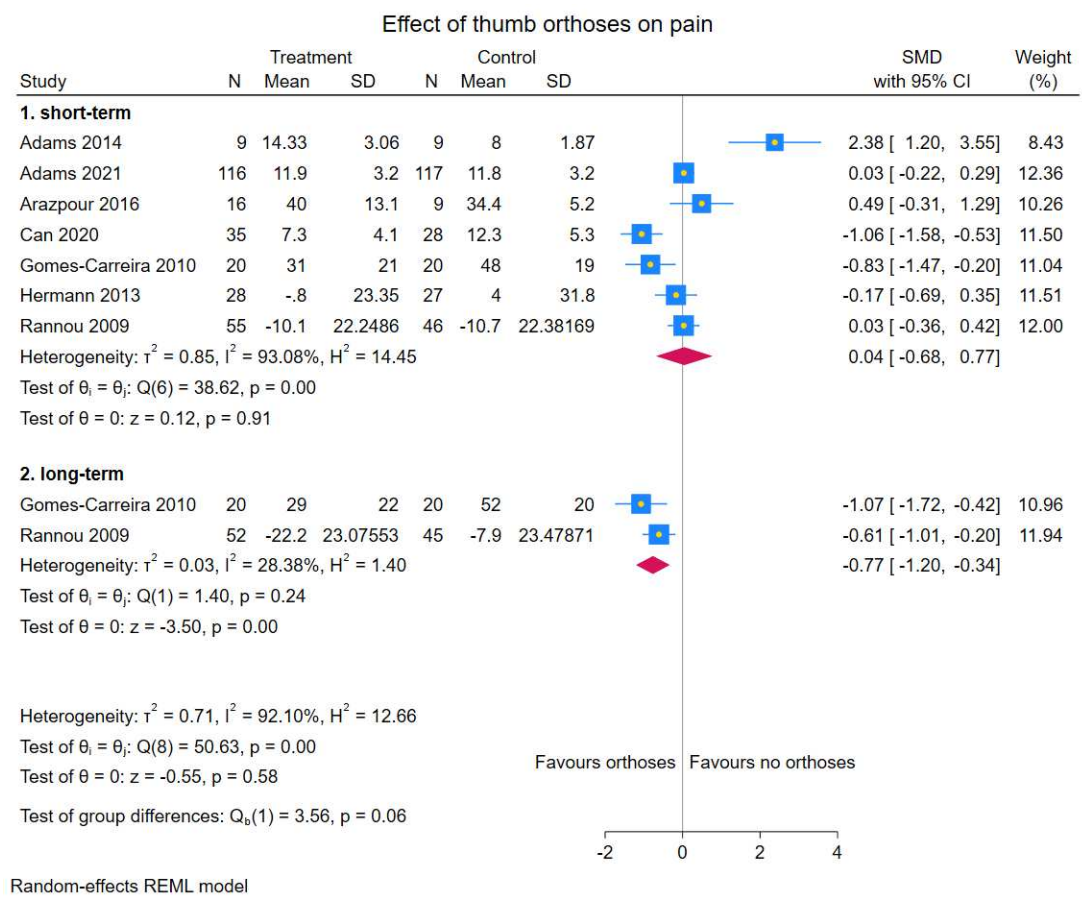

**Figure S8.** Forest plot of thumb orthoses vs. no thumb orthoses or placebo: short- and long-term function

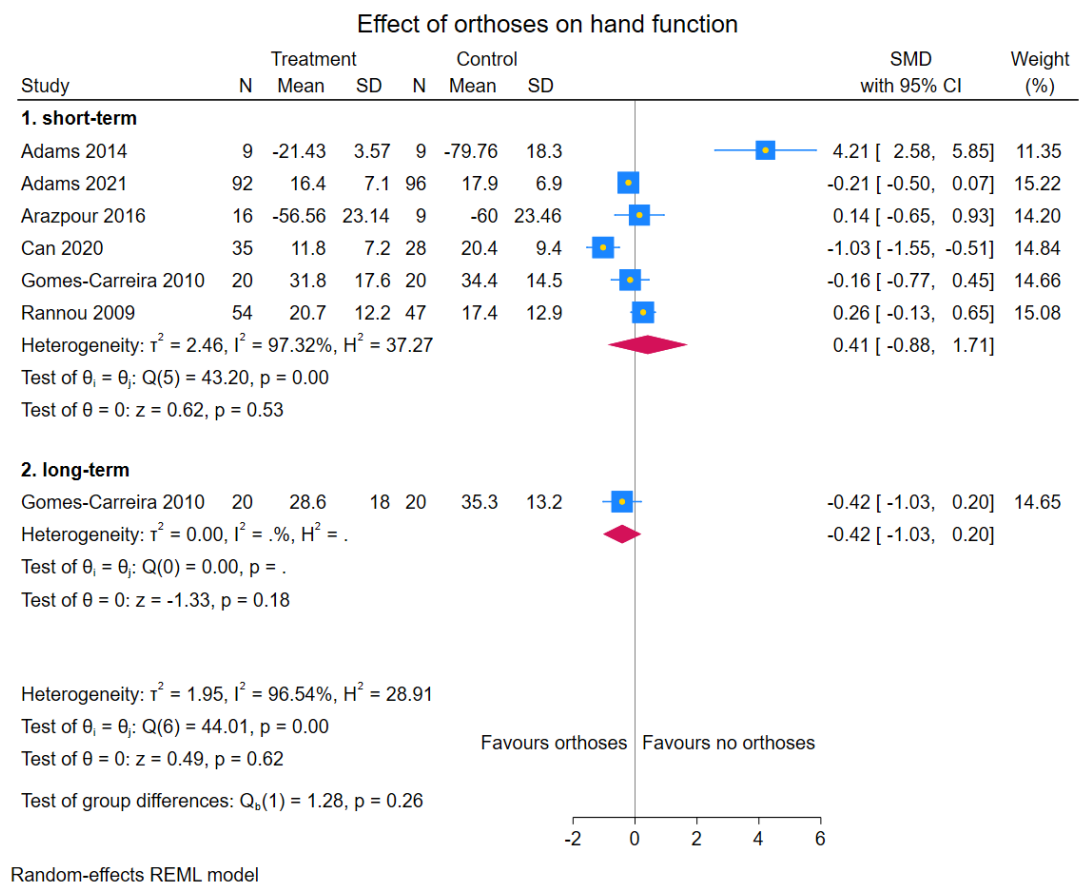

**Figure S9.** Forest plot of thumb orthoses vs. no thumb orthoses or placebo: short- and long-term grip strength

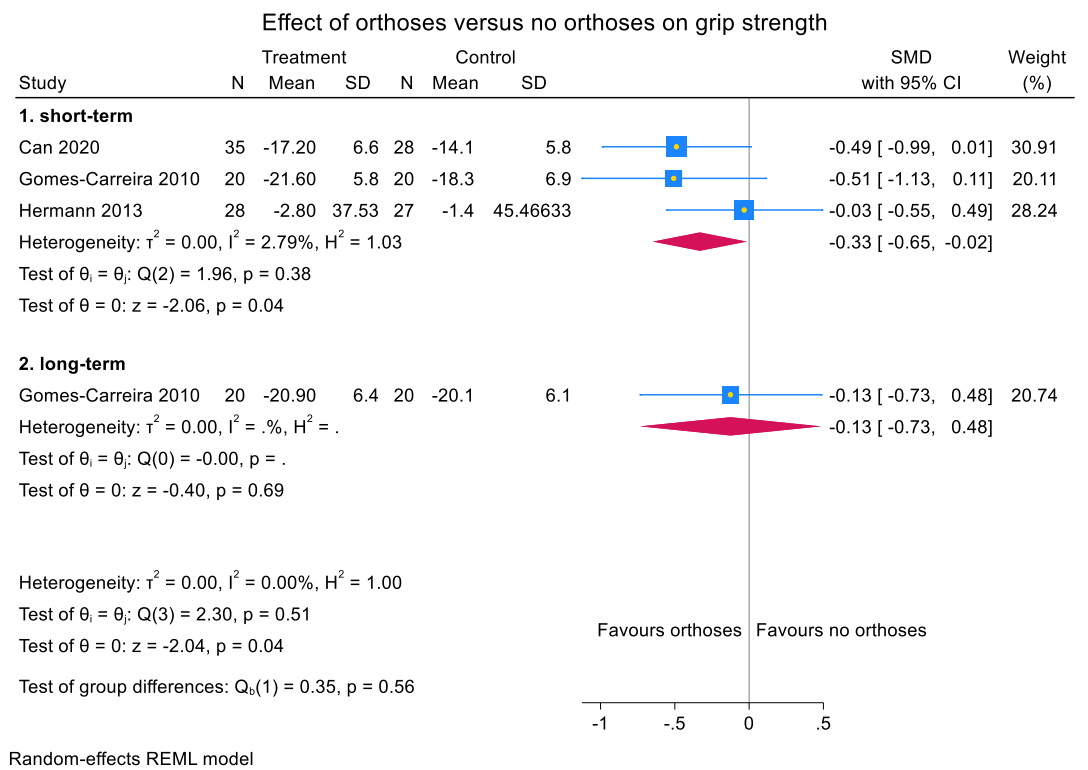

**Figure S10.** Forest plot of thumb orthoses vs. no thumb orthoses or placebo: all adverse events

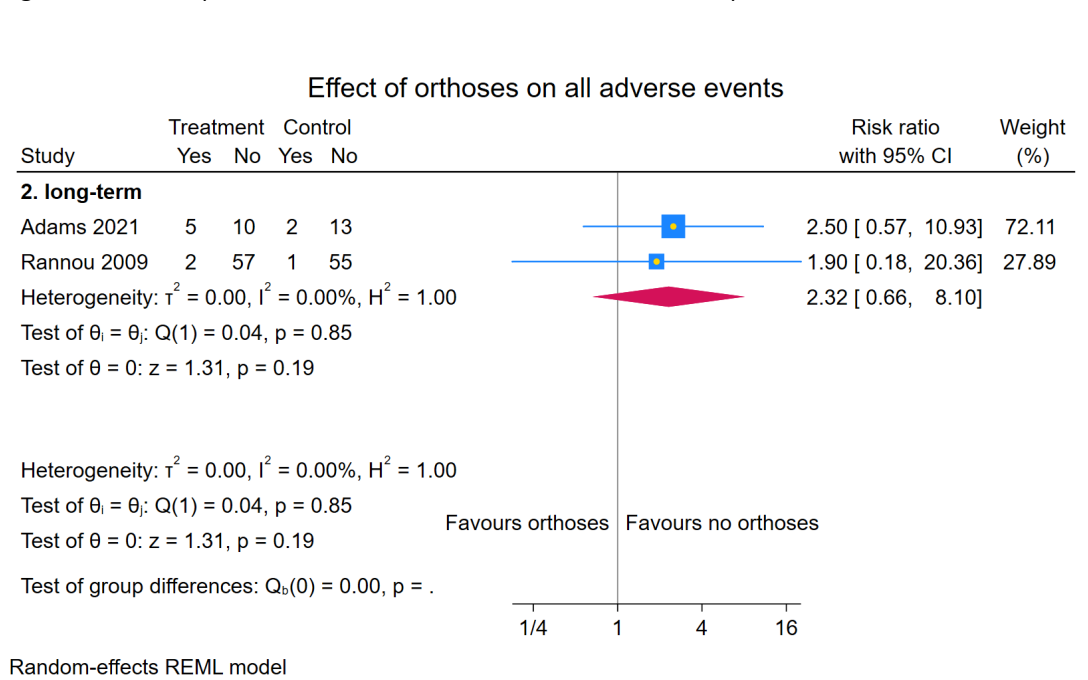

**Figure S11.** Forest plot of thumb orthoses vs. no thumb orthoses or placebo: withdrawals from adverse events

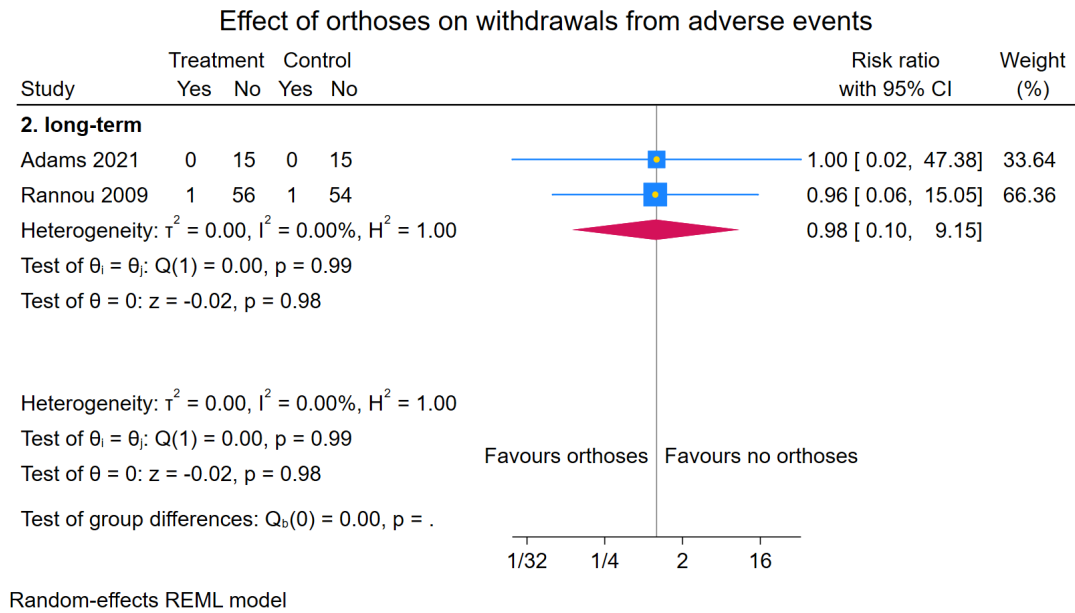

**Figure S12.** Forest plot of orthoses immobilising the CMC-joint only vs orthoses also immobilising the wrist and/or one or more additional thumb joints: short- and long-term pain

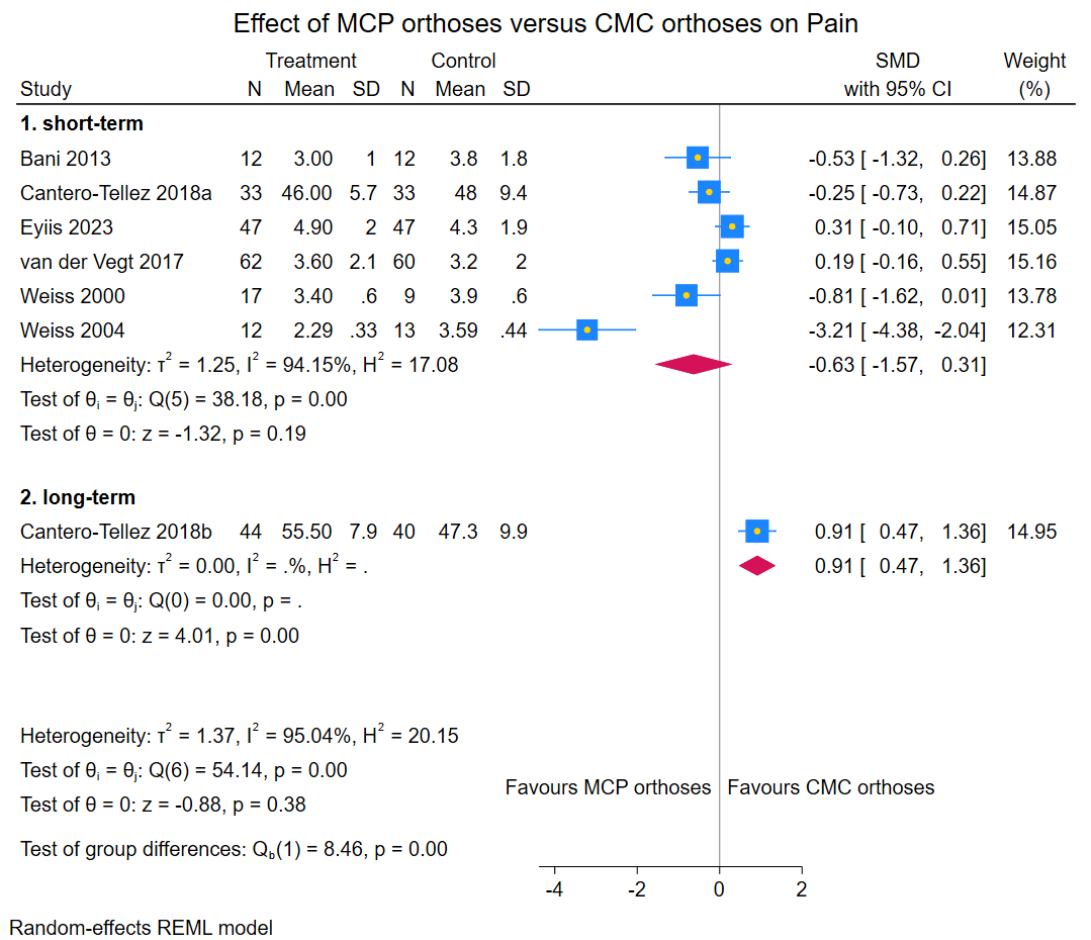

**Figure S13.** Forest plot of short- and long-term orthoses immobilising the CMC-joint only vs orthoses also immobilising the wrist and/or one or more additional thumb joints: function

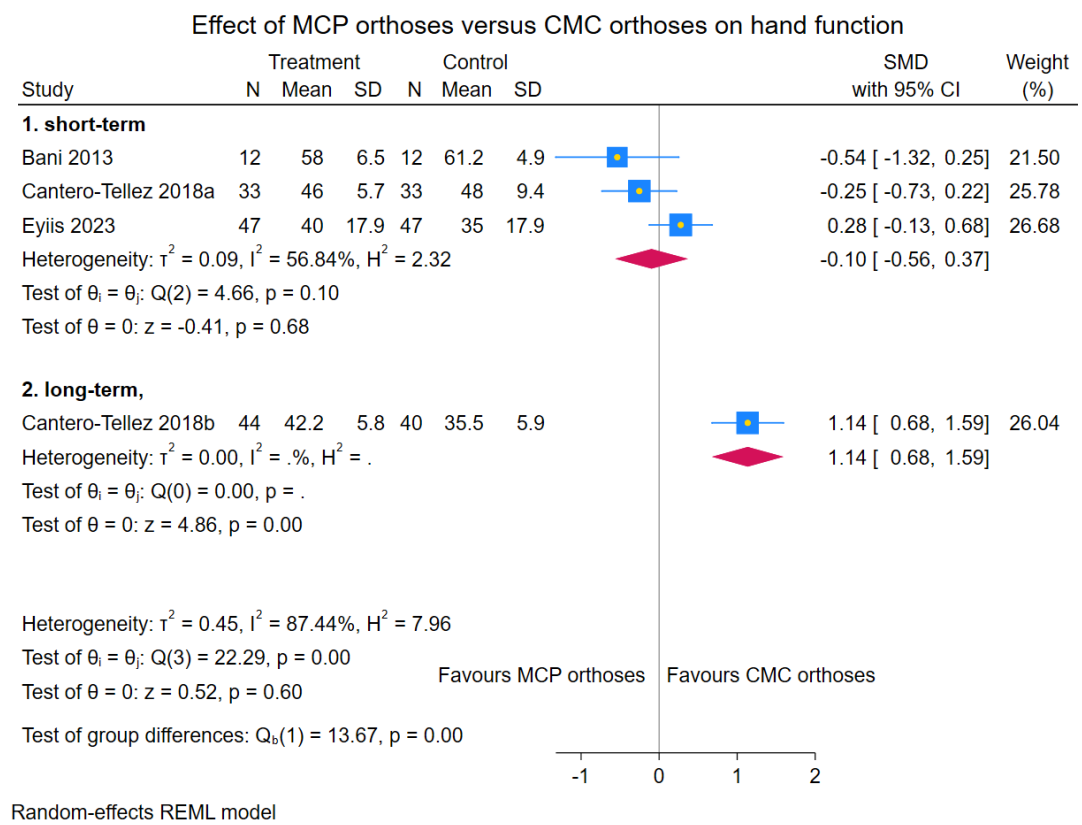



5.3. Assistive devices

Figure S14. Forest plot of assistive devices vs. usual care or no intervention: short- and long-term pain

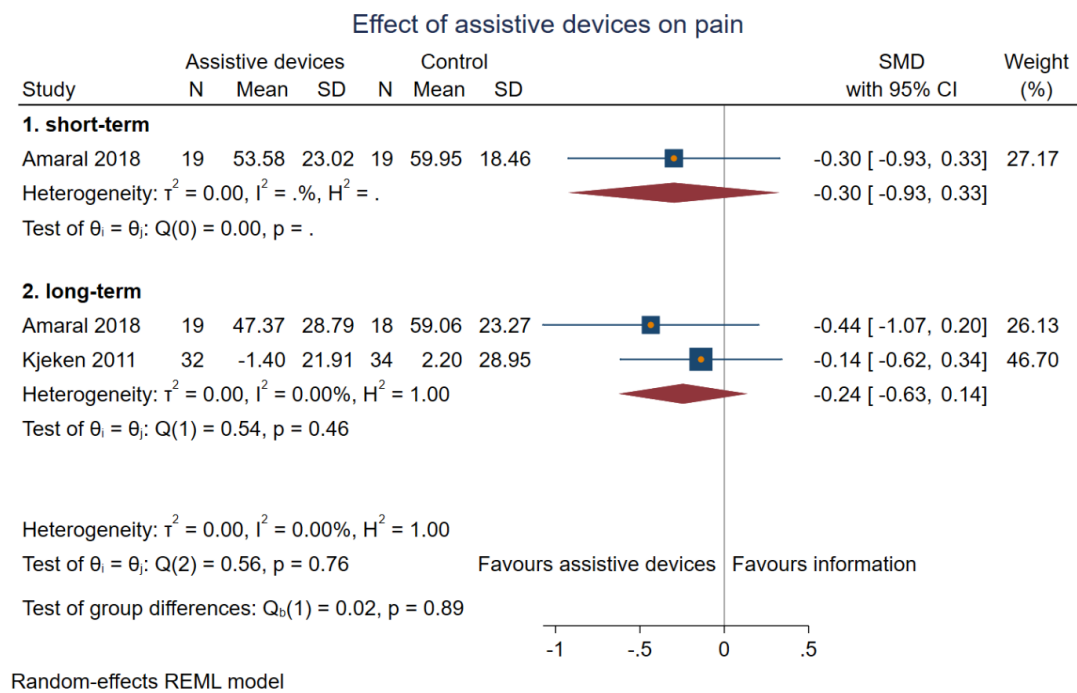

**Figure S15.** Forest plot of assistive devices vs. usual care or no intervention: short- and long-term function

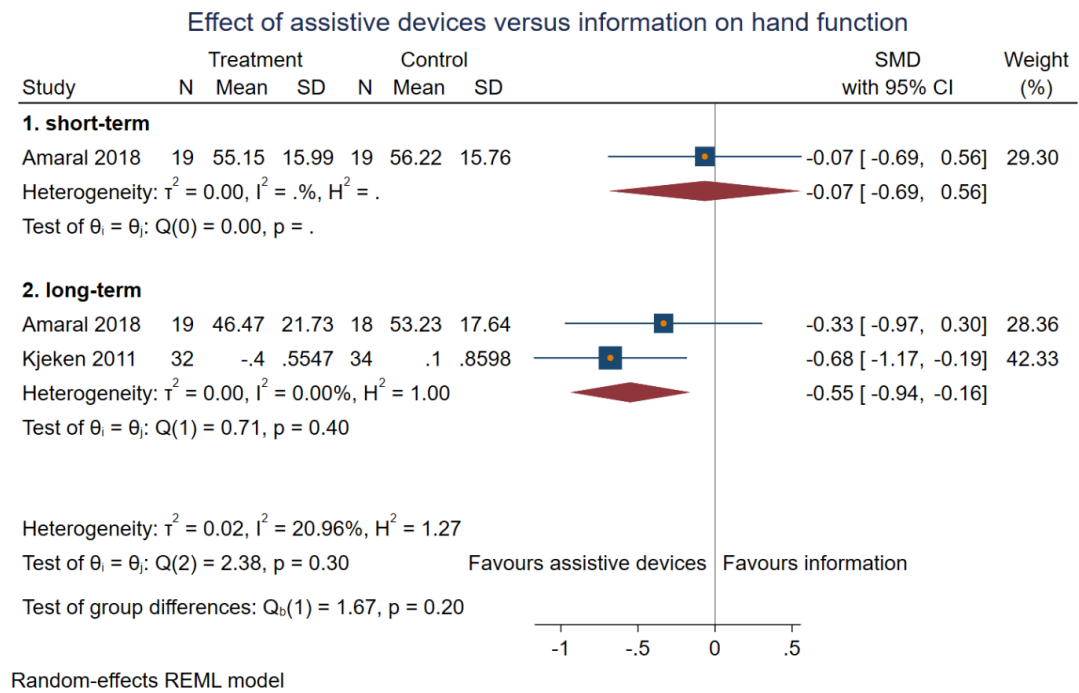

5.4. Thermal modalities

Figure S16. Forest plot of thermal modalities vs. usual care or no intervention: short- and long-term pain

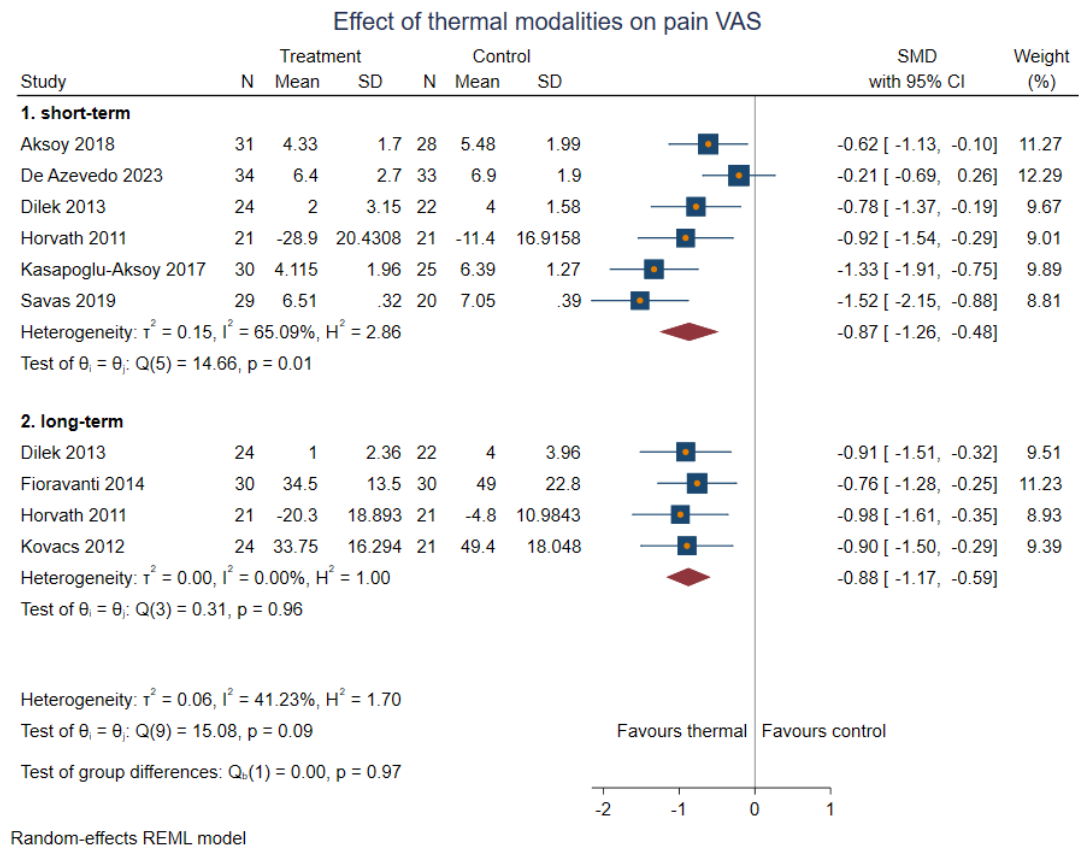

**Figure S17.** Forest plot of thermal modalities vs. usual care or no intervention: short- and long-term function

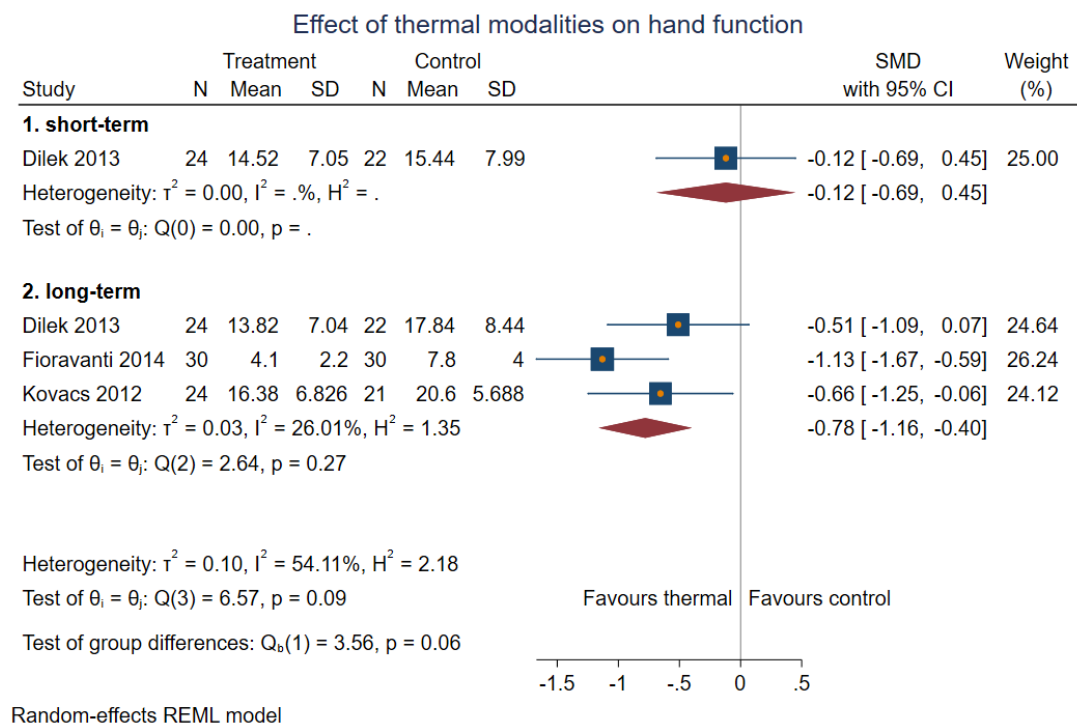

**Figure S18.** Forest plot of thermal modalities vs. usual care or no intervention: short- and long-term grip strength

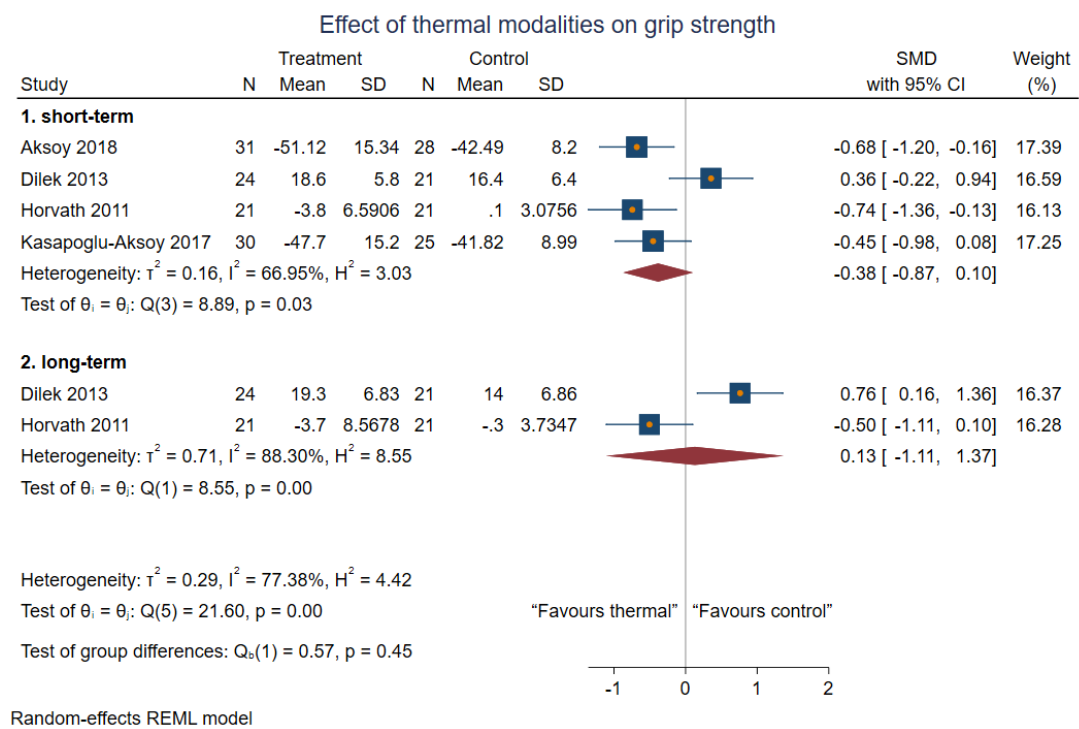

5.5. Ultrasound/laser therapy

Figure S19. Forest plot of ultrasound/laser therapy vs. sham or no intervention: short- and long-term pain

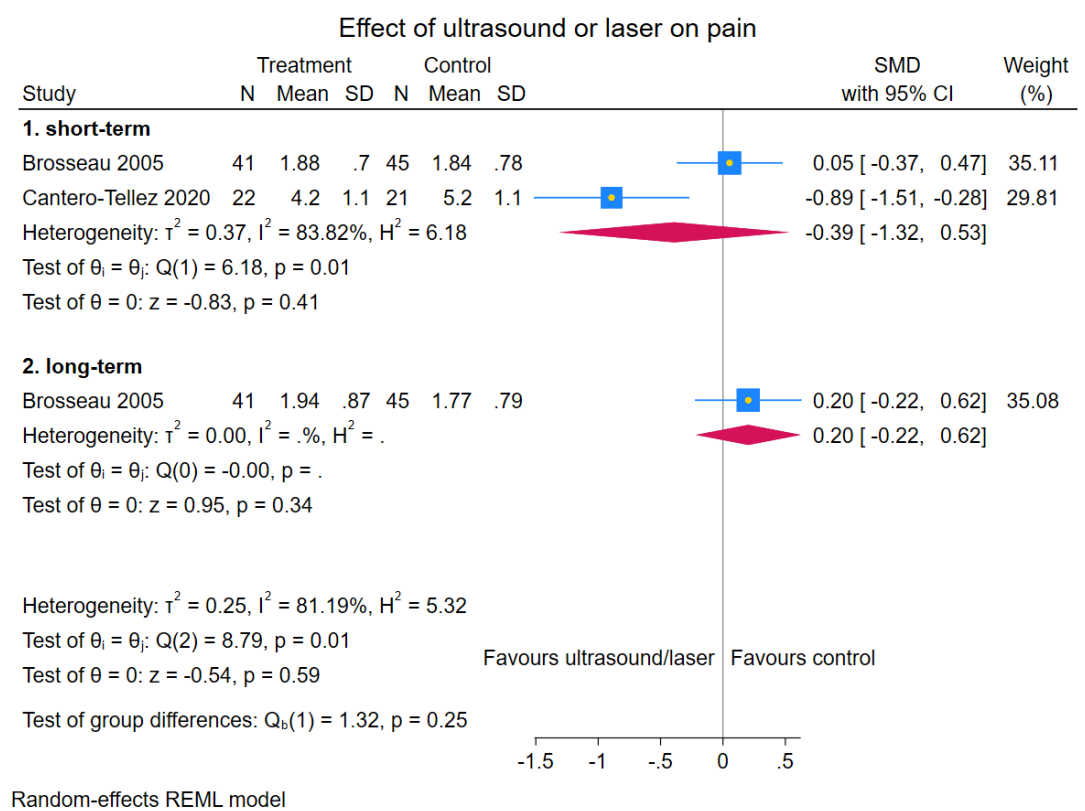

**Figure S20.** Forest plot of ultrasound/laser therapy vs. sham or no intervention: short- and long-term grip strength

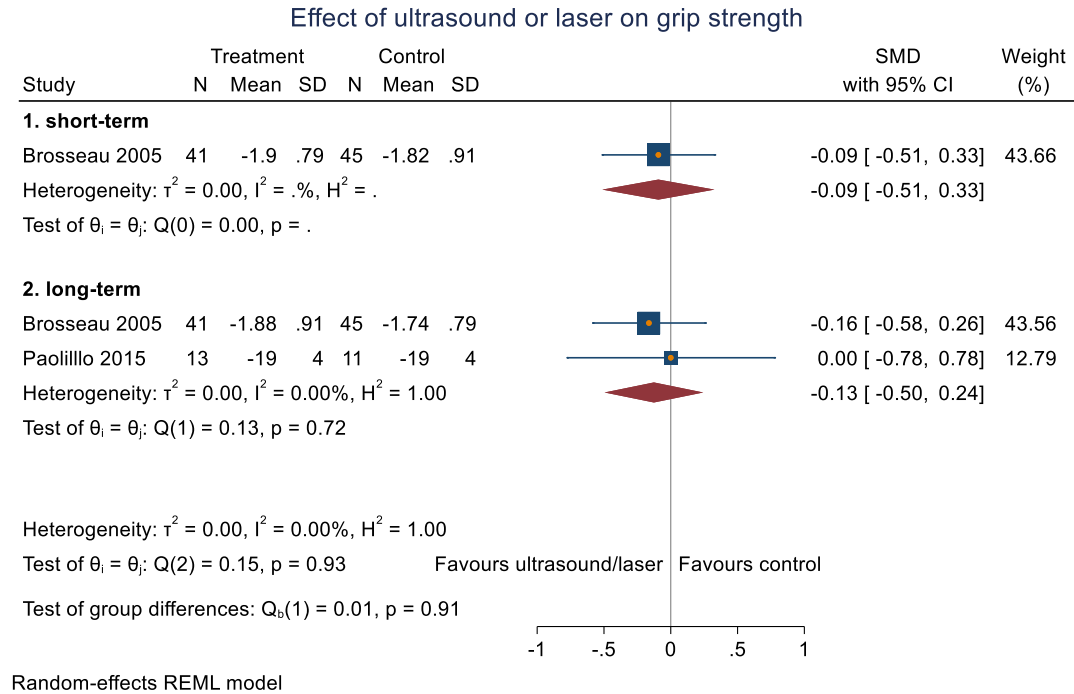

5.6. Combination programmes

**Figure S21.** Forest plot of combination programmes vs. sham or no intervention: short- and long-term pain

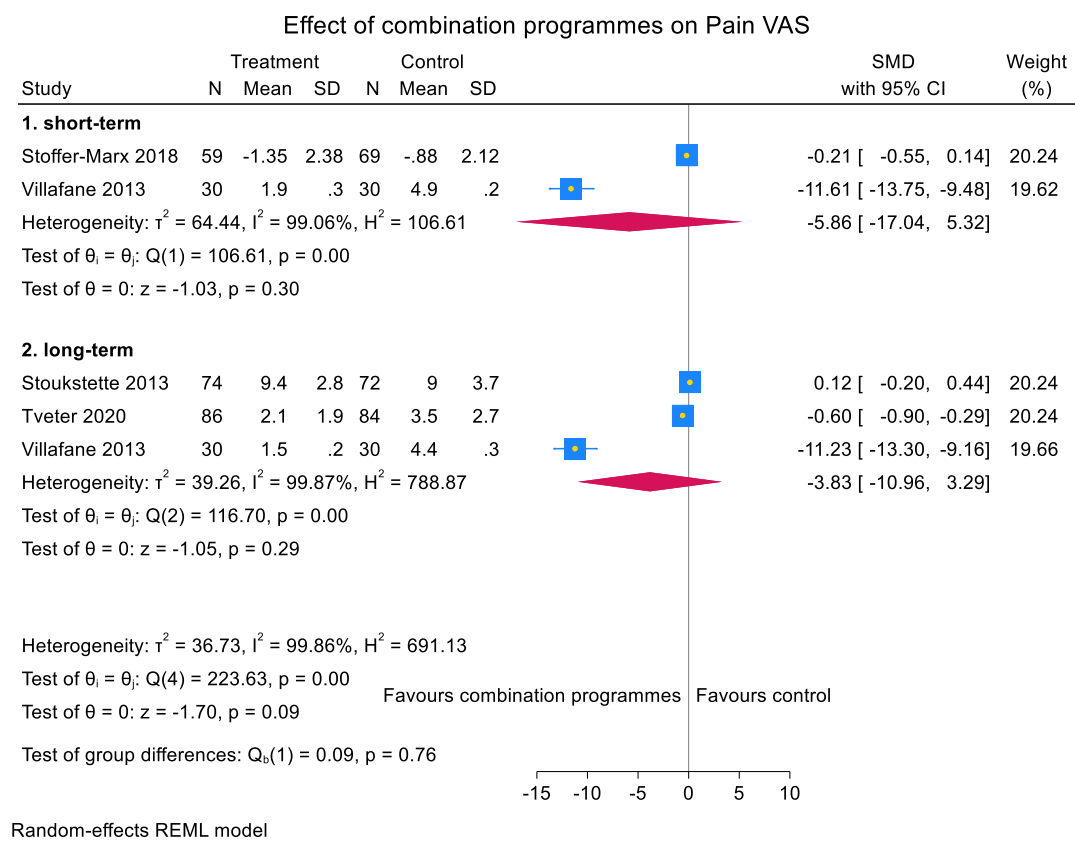



Figure S22. Forest plot of combination programmes vs. sham or no intervention: long-term function

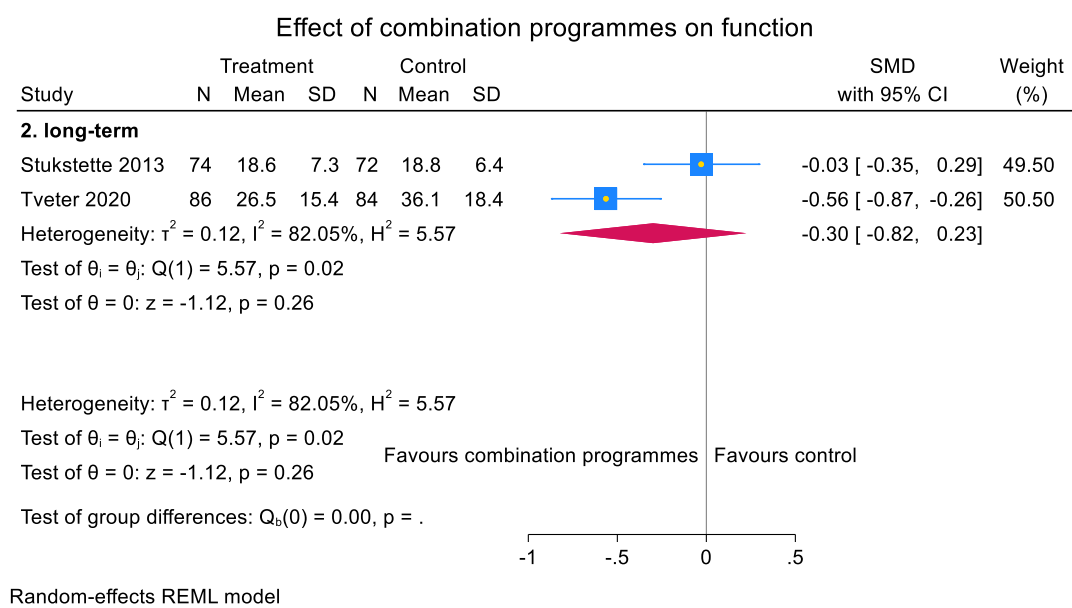

Figure S23. Forest plot of combination programmes vs. sham or no intervention: long-term grip strength

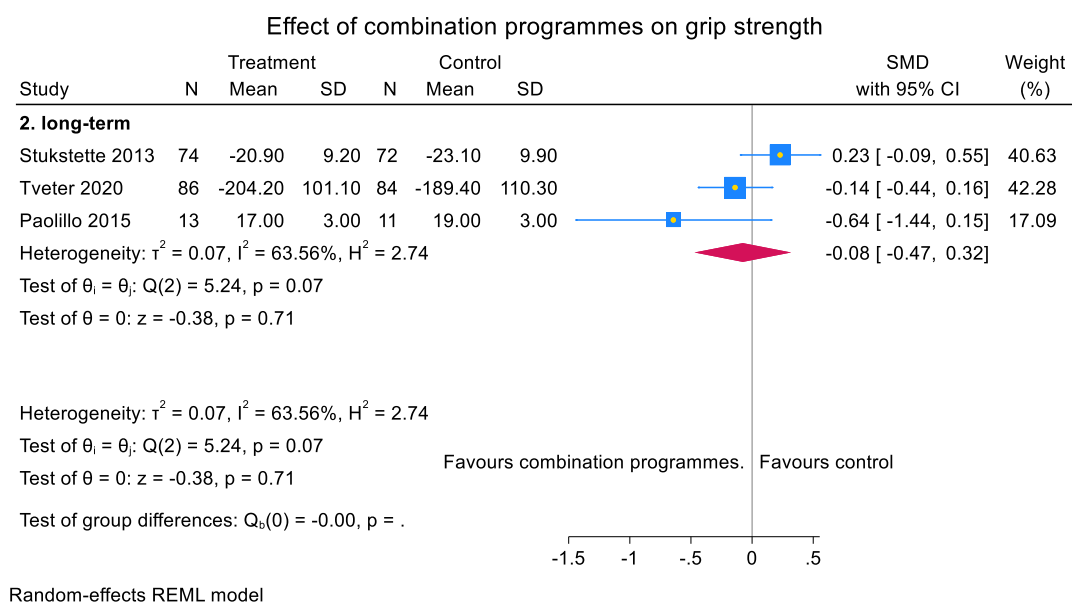

**Figure S24.** Forest plot of combination programmes vs. sham or no intervention: all adverse events

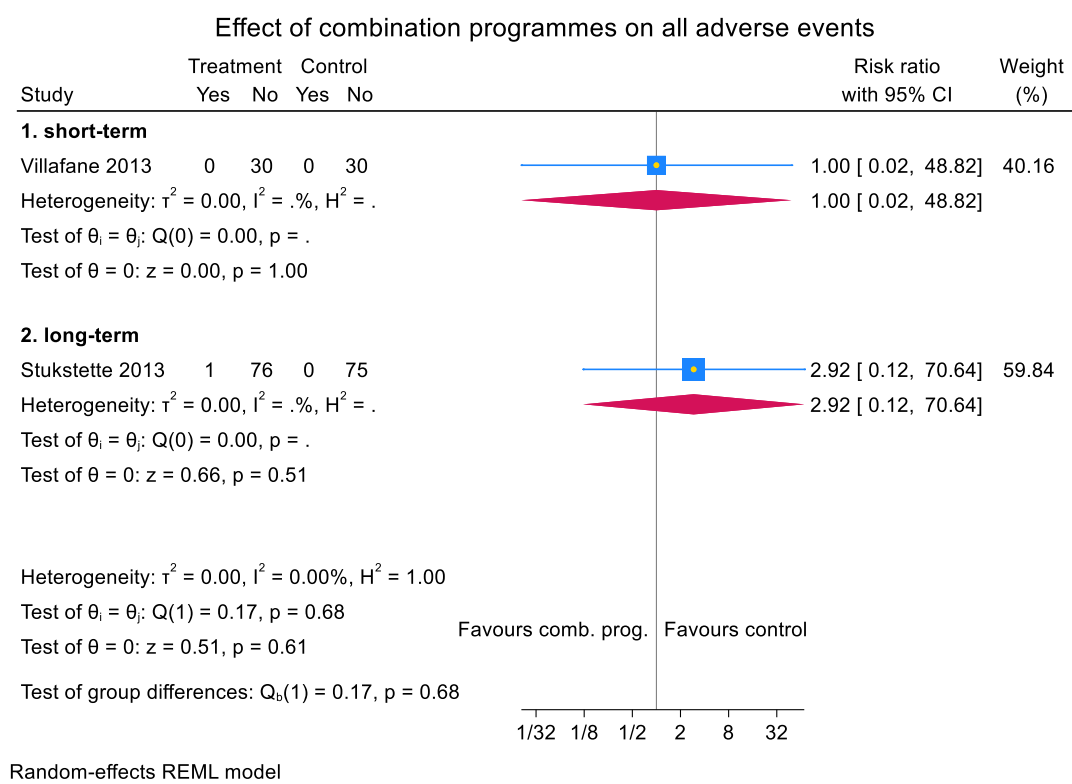

5.7. Topical NSAIDs

Figure S25. Forest plot of topical NSAIDs versus placebo: short term pain

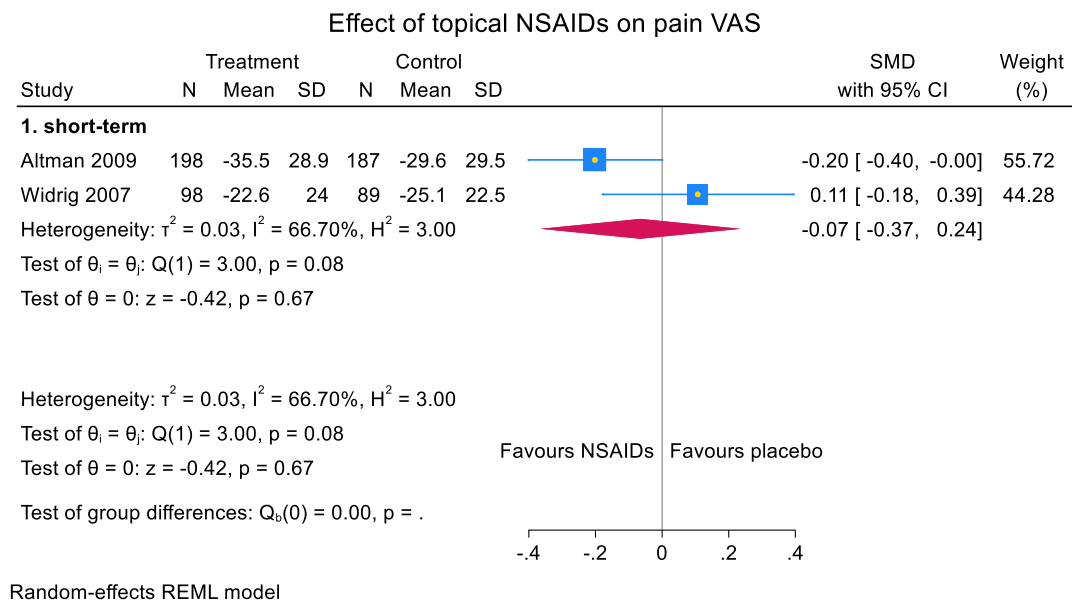

Figure S26. Forest plot of topical NSAIDs versus placebo: short term function

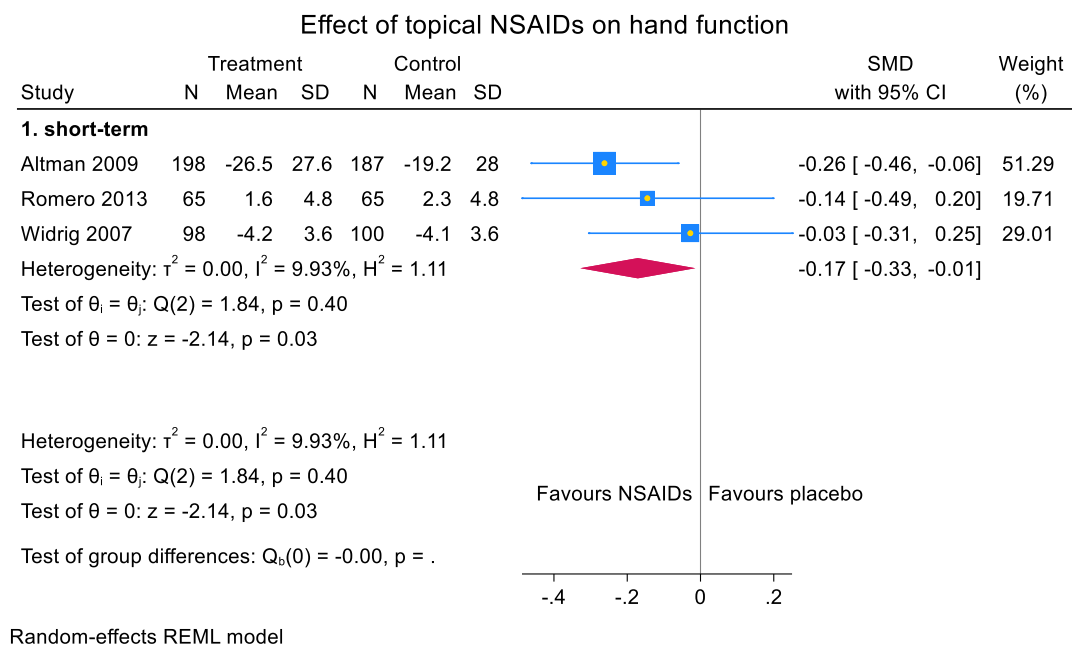

Figure S27. Forest plot of oral NSAIDs versus placebo: pain

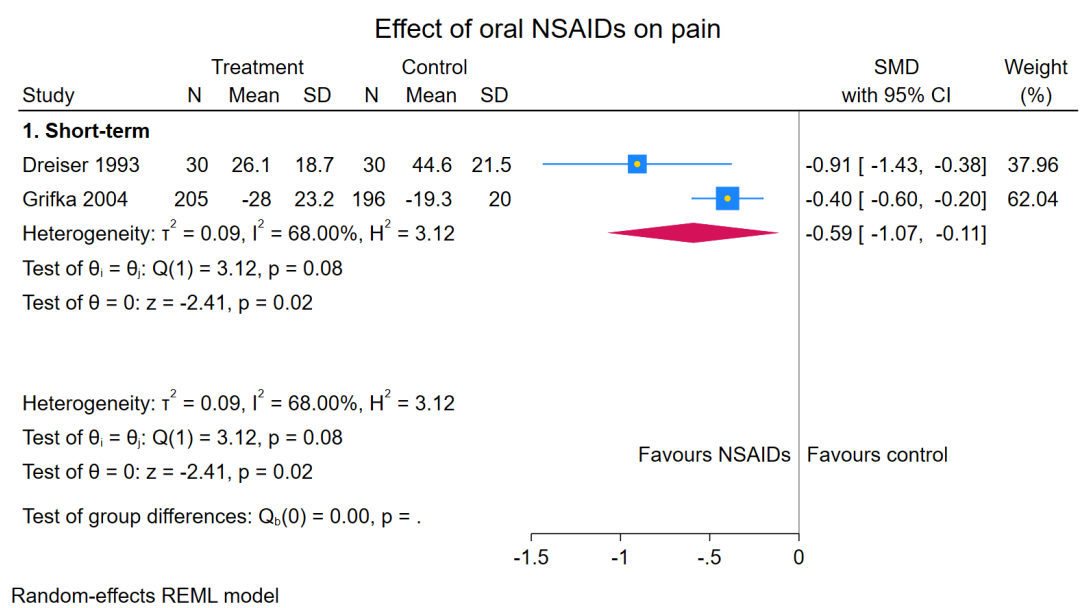

Figure S28. Forest plot of oral NSAIDs versus placebo: all adverse events

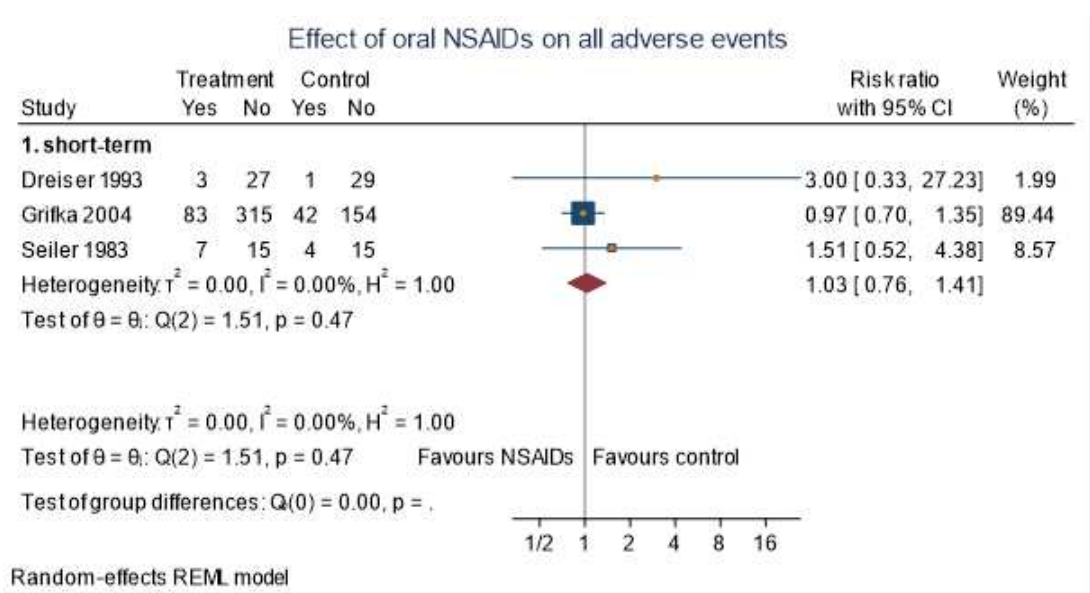

Figure S29. Forest plot of oral NSAIDs versus placebo: severe adverse events

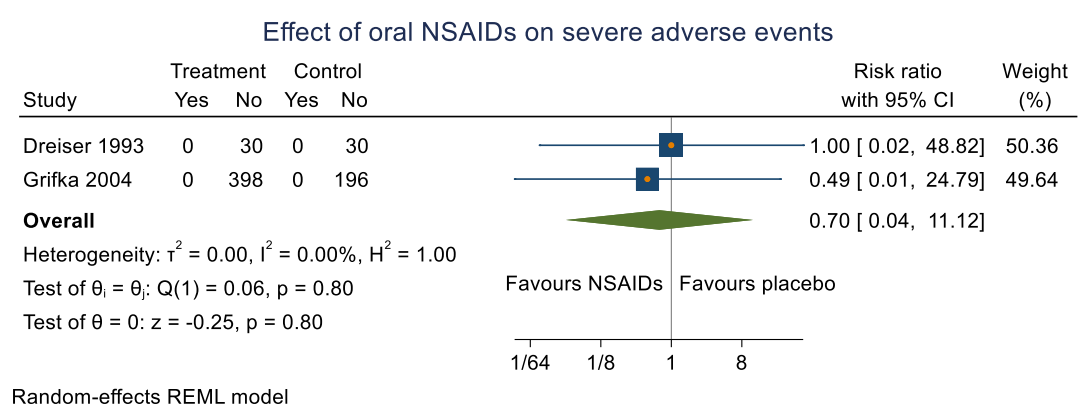

Figure S30. Forest plot of oral NSAIDs versus placebo: withdrawal from adverse events

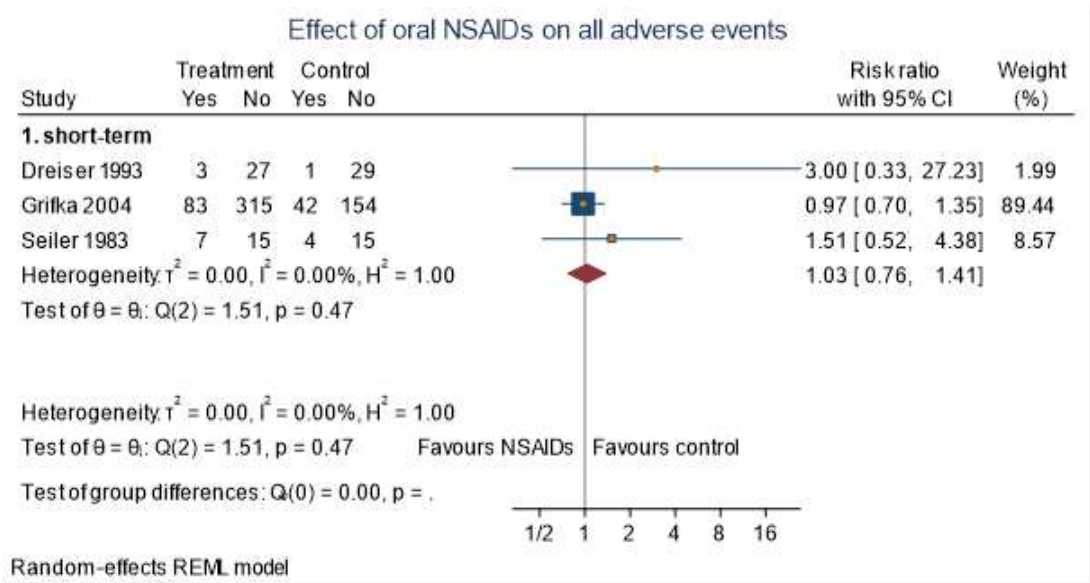

Figure S31. Forest plot of oral NSAIDs versus placebo: gastrointestinal adverse events

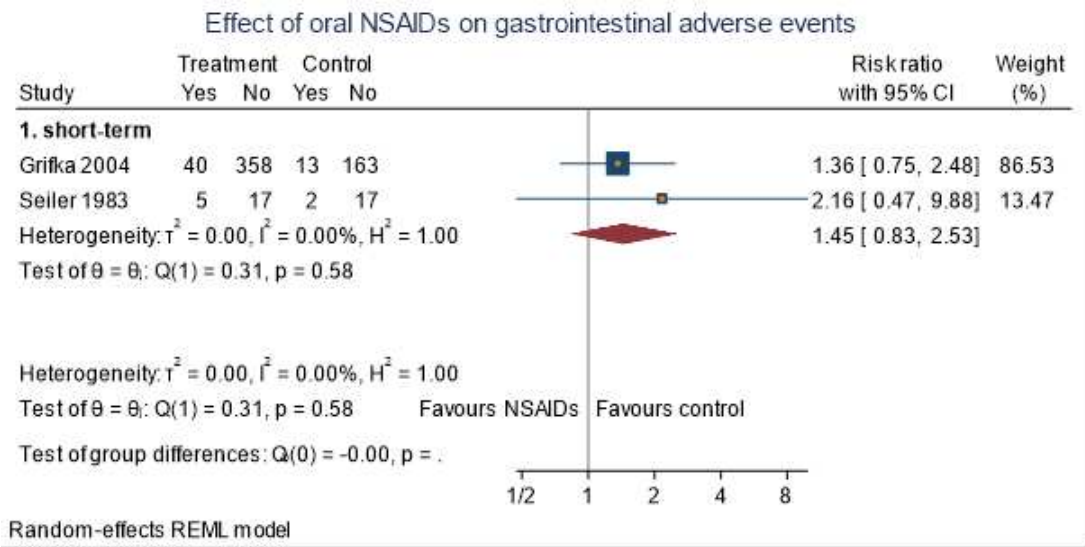

5.8. Oral glucocorticoids

Figure S32. Forest plot of oral glucocorticoids versus placebo: short- and long-term pain

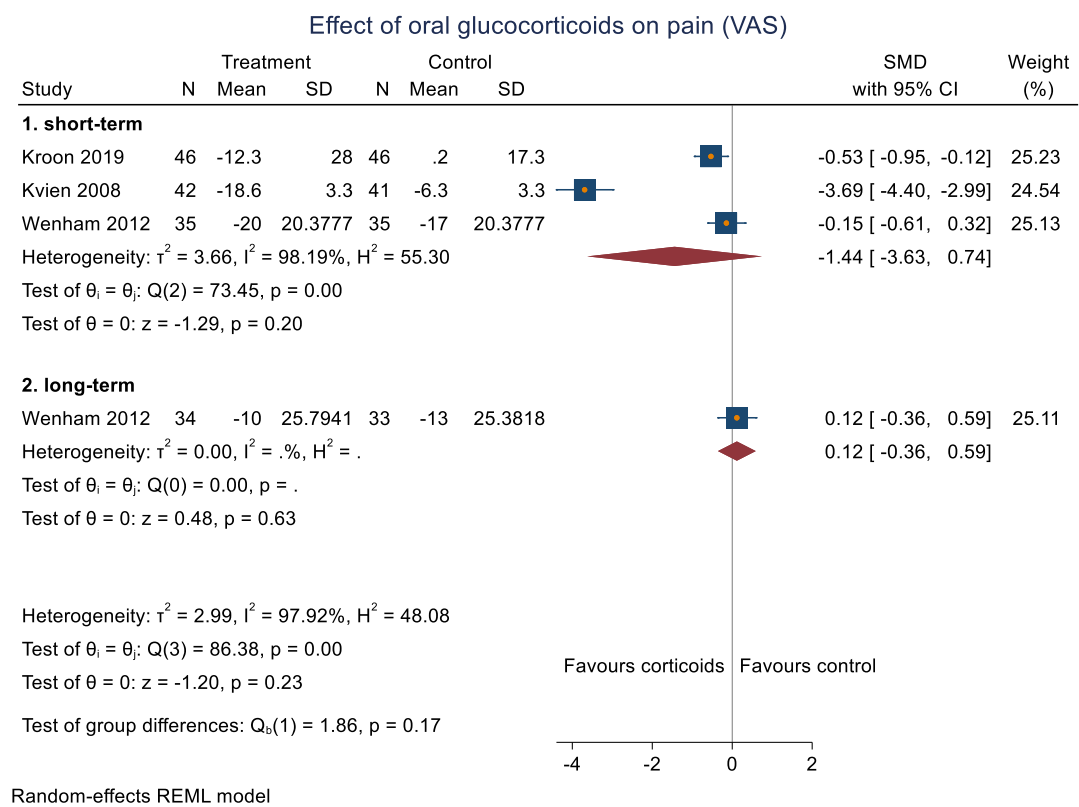

Figure S33. Forest plot of oral glucocorticoids versus placebo: short- and long-term function

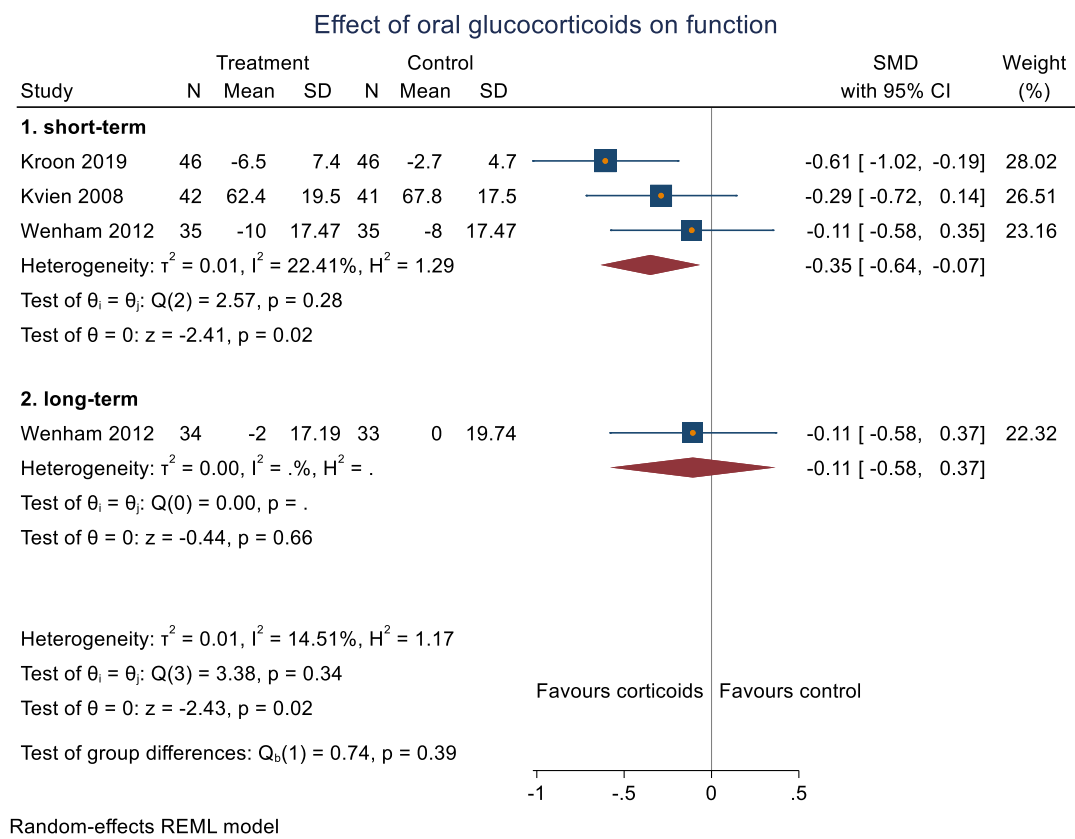



5.9. Intra-articular glucocorticoids

Figure S34.

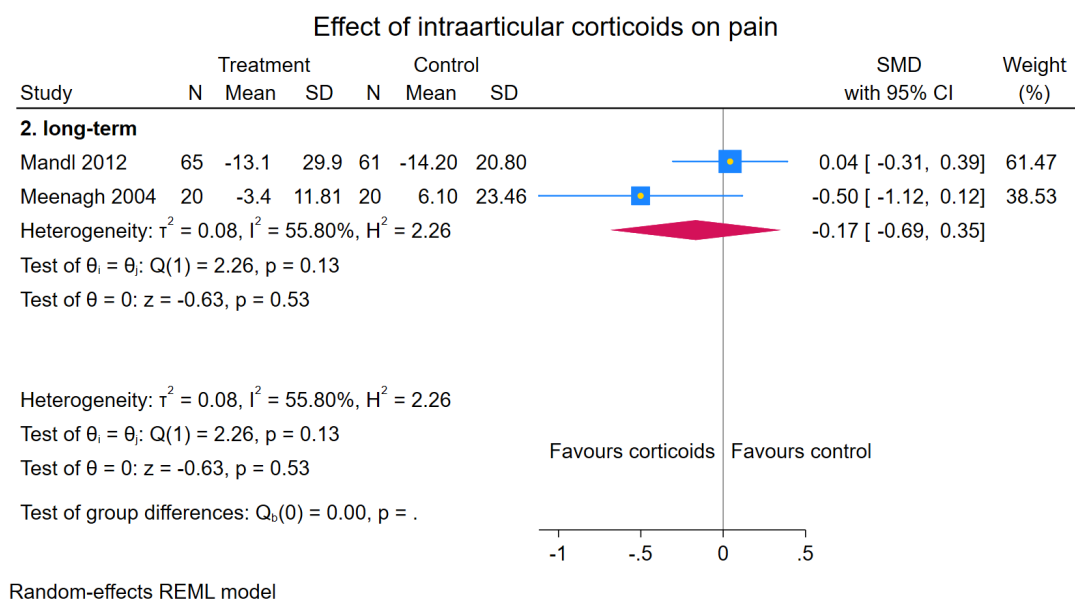

Figure S35. Forest plot of intraarticular glucocorticoids versus placebo: all adverse events

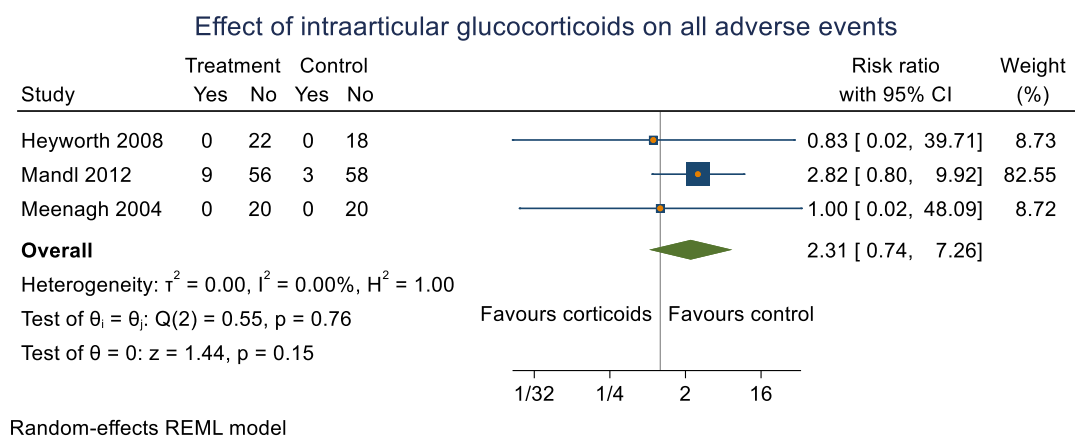

5.10. bDMARDs/TNF-inhibitors

Figure S36. Forest plot of DMARDs/TNF-inhibitors vs placebo on long-term pain

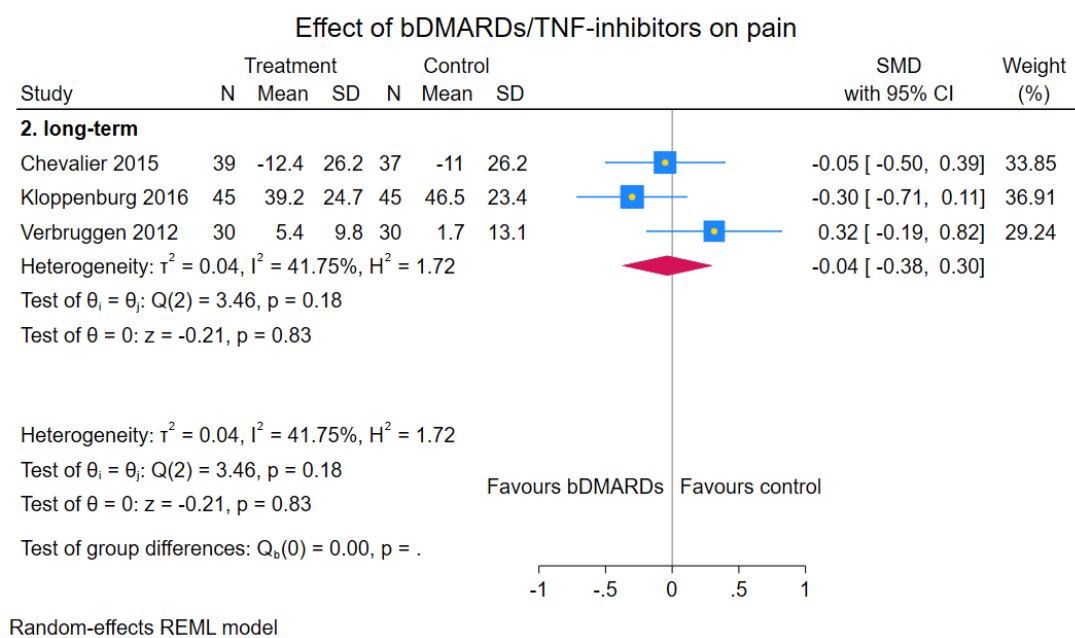

Figure S37. Forest plot of bDMARDs/TNF-inhibitors vs placebo all adverse events

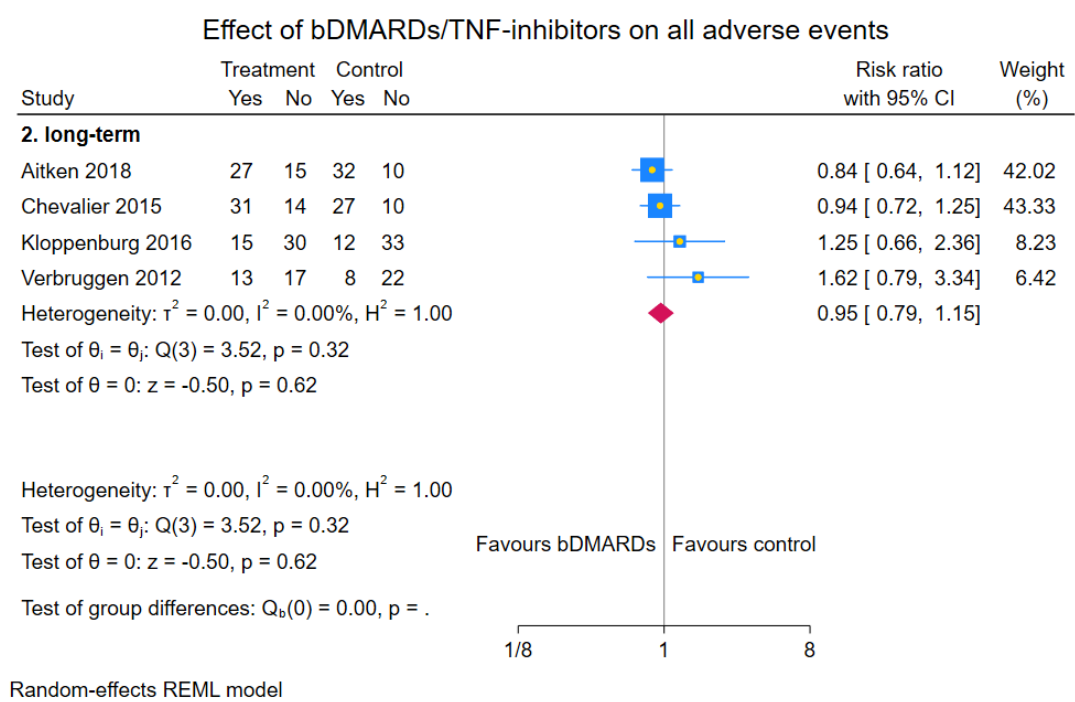

Figure S38. Forest plot of bDMARDs/TNF-inhibitors vs placebo on severe adverse events

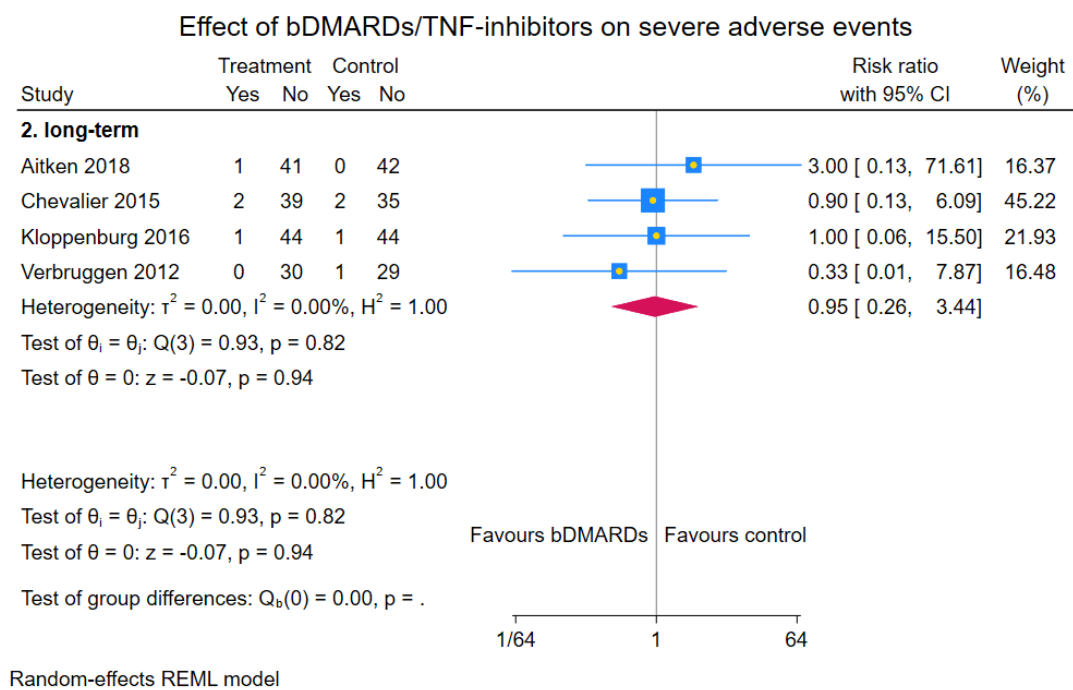

Figure S39. Forest plot of bDMARDs/TNF-inhibitors vs placebo on withdrawal from adverse events

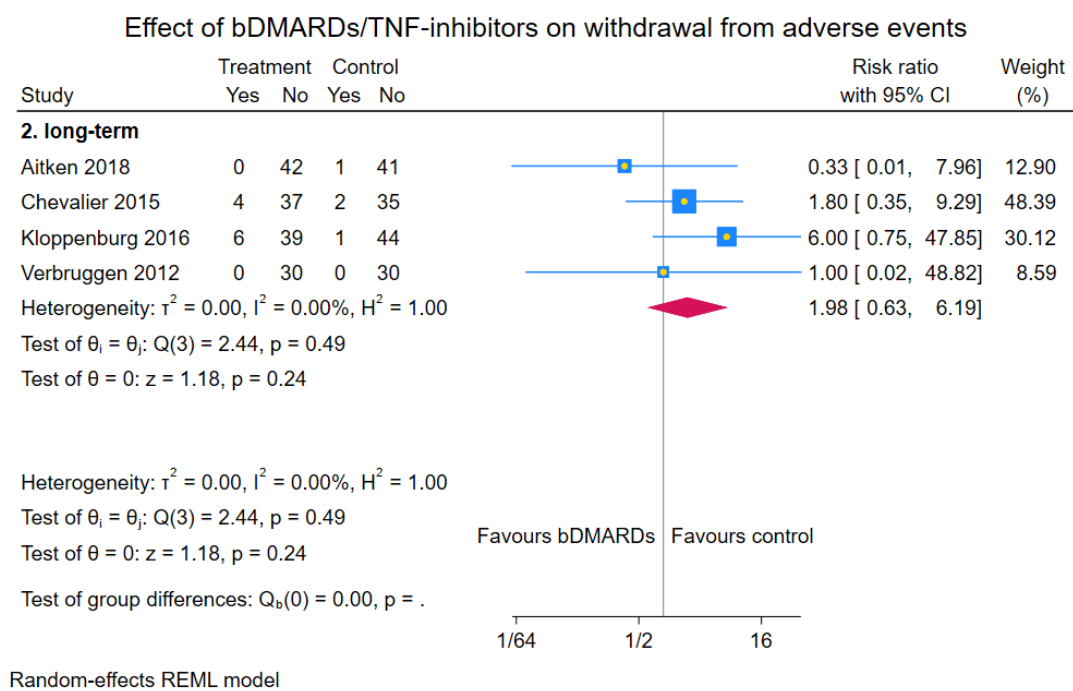

5.11. Synthetic DMARDs (hydroxychloroquine)

Figure S40. Forest plot of synthetic DMARDs (hydroxychloroquine) vs placebo on short- and long-term pain

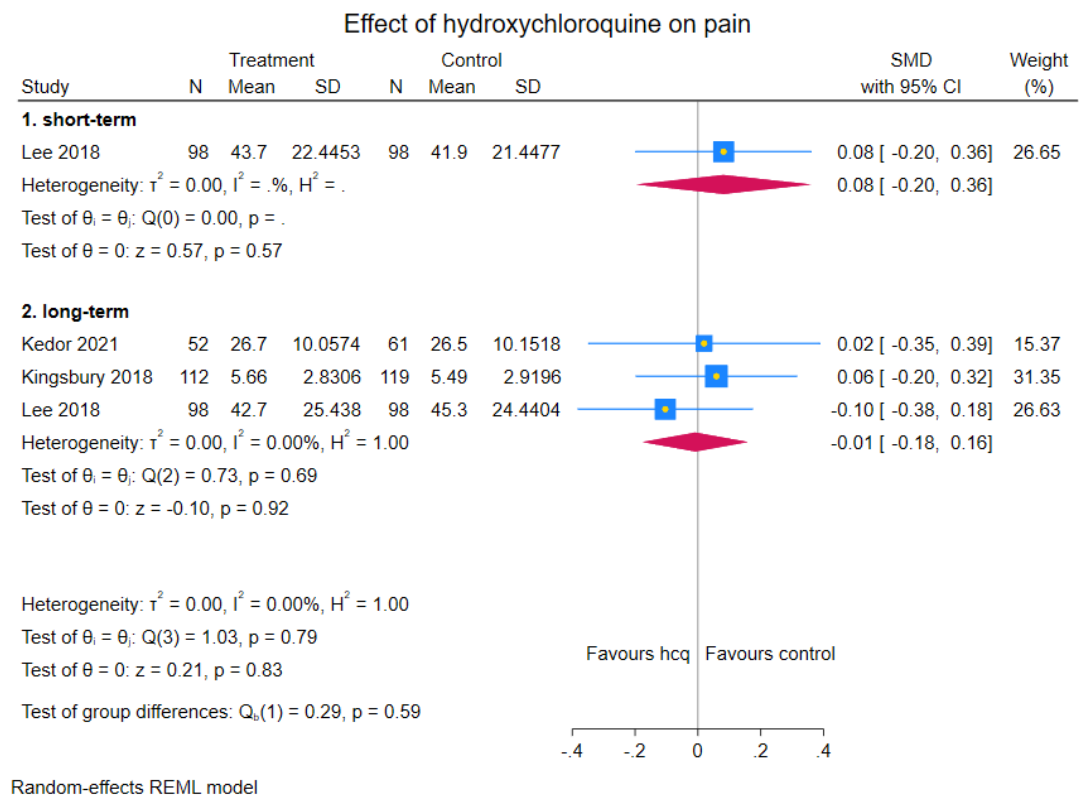

Figure S41 Forest plot of synthetic DMARDs (hydroxychloroquine) vs placebo on long-term function

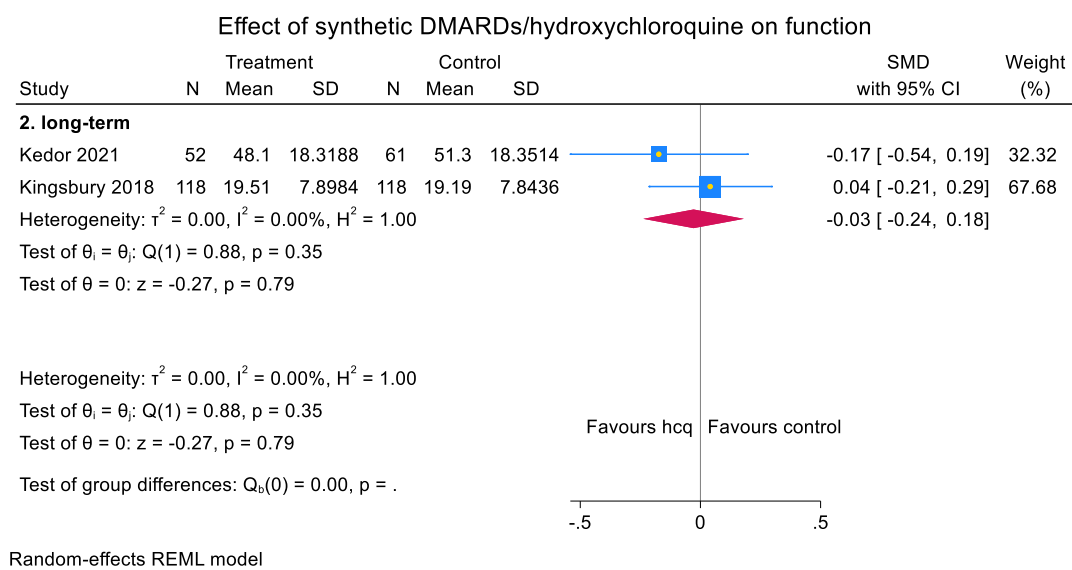

Figure S42. Forest plot of synthetic DMARDs (hydroxychloroquine) vs placebo on all adverse events

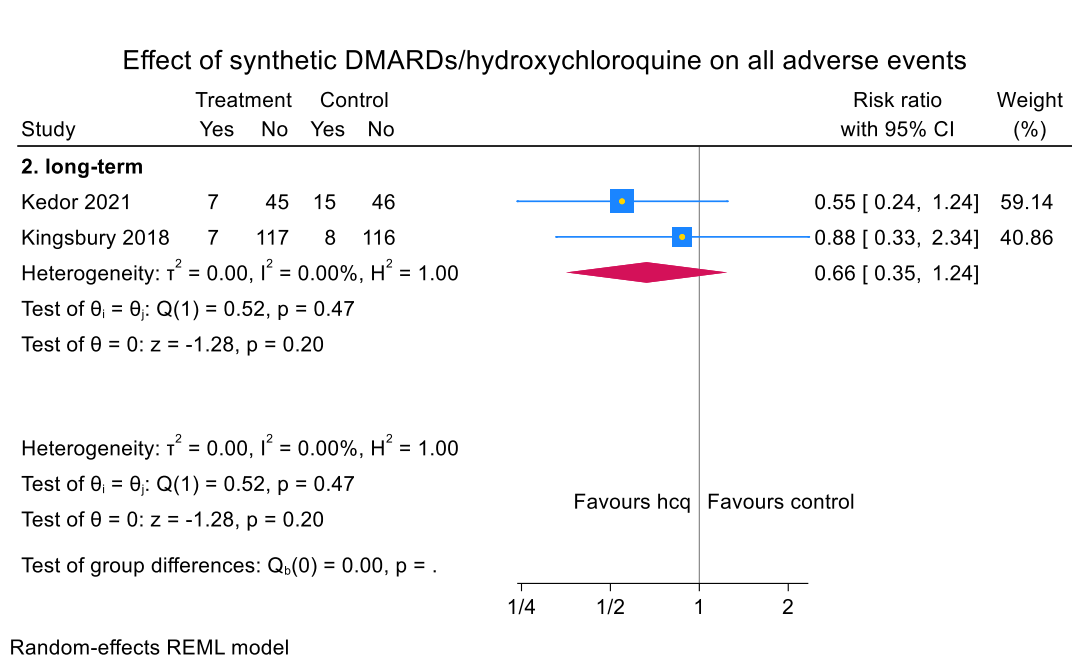

Figure S43. Forest plot of synthetic DMARDs (Methotrexate) vs placebo pain

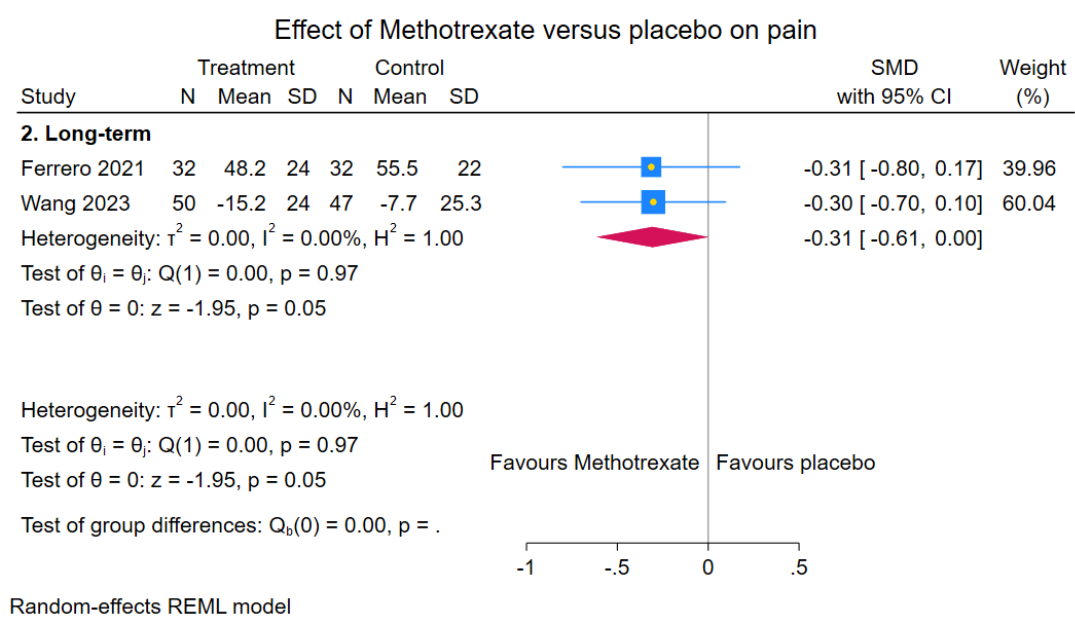

Figure S44. Forest plot of synthetic DMARDs (Methotrexate) vs placebo on function

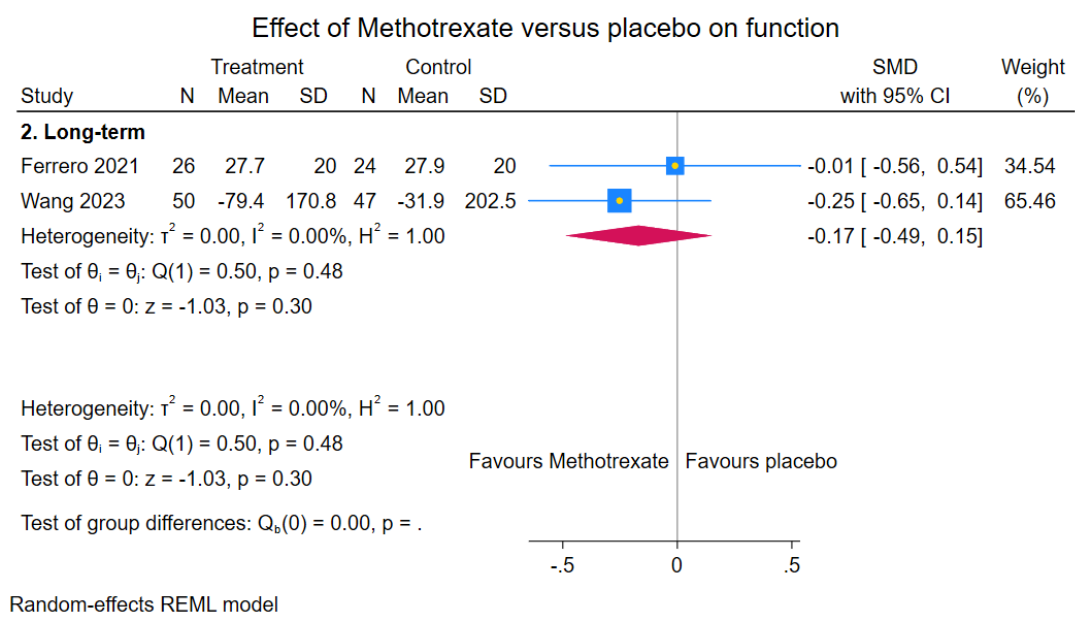

**Figure S45.** Forest plot of synthetic DMARDs (Methotrexate) vs placebo on all adverse events

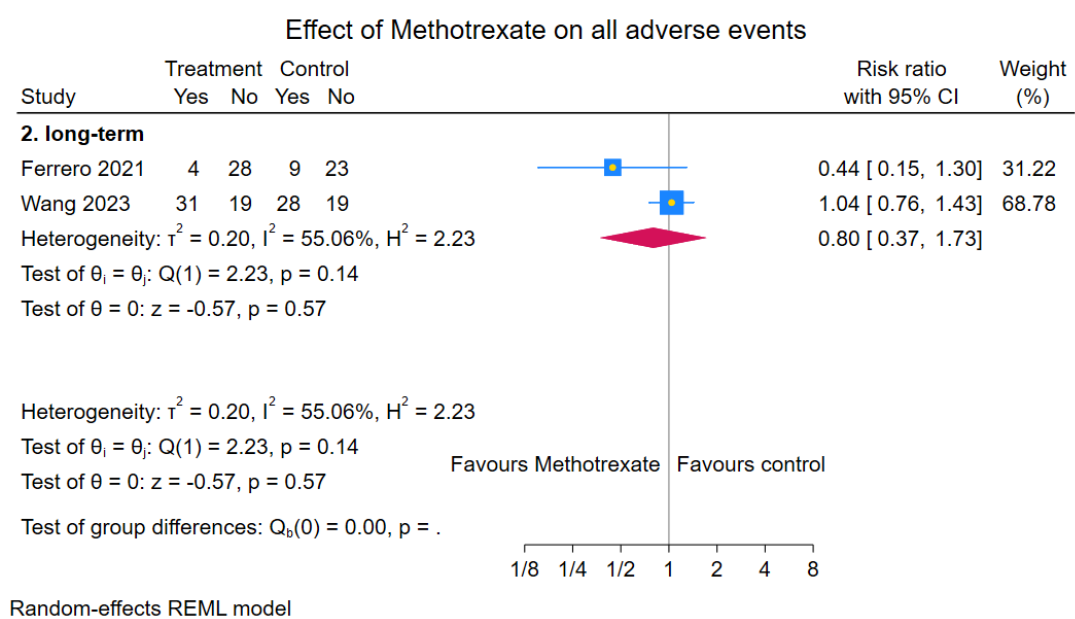

**Figure S46.** Forest plot of Colchicine vs placebo pain

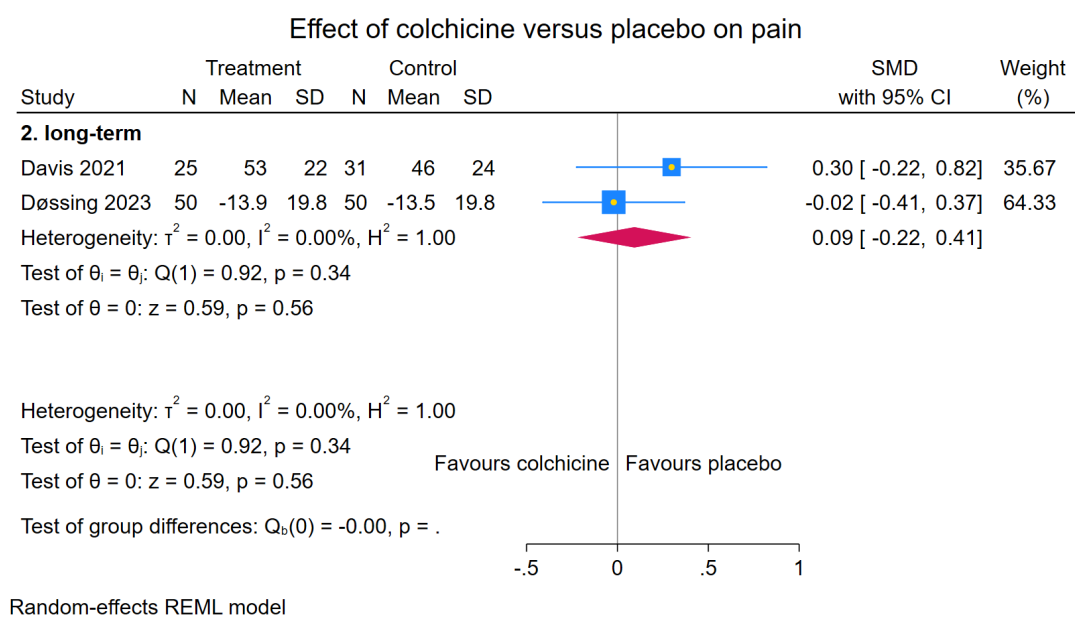

Figure S47. Forest plot of Colchicine vs placebo function

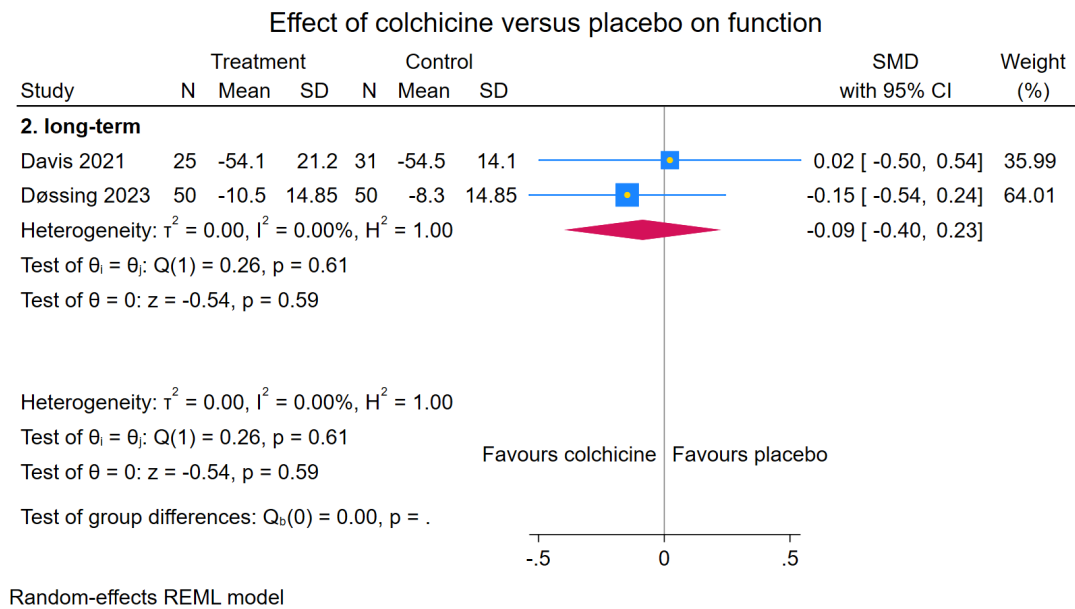

Figure S48. Forest plot of Colchicine vs placebo on grip strength

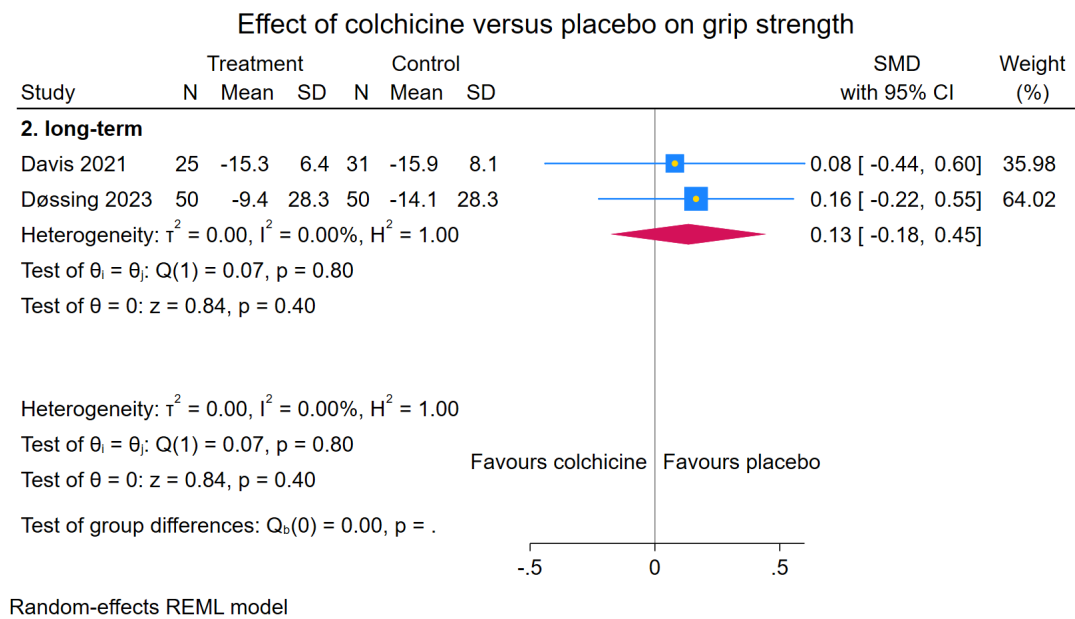



Figure S49. Forest plot of Colchicine vs placebo on all adverse events

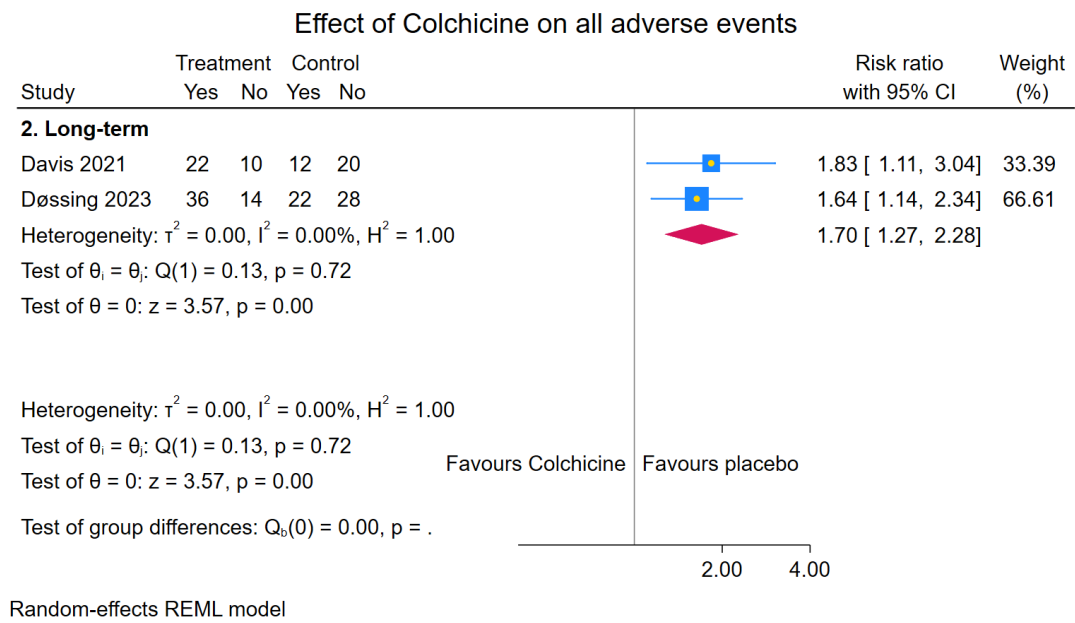

**7. LIST OF ABBREVIATIONS**

|        |                                                                   |
|--------|-------------------------------------------------------------------|
| A      | Conference abstract                                               |
| ACR    | American College of Rheumatology                                  |
| ADLs   | Activities of daily living                                        |
| AE     | Adverse event                                                     |
| AUSCAN | Australian/Canadian Hand Osteoarthritis Index                     |
| CMC    | First carpometacarpal                                             |
| CO     | Cross-over trial                                                  |
| d      | Day(s)                                                            |
| E-L    | Eaton-Litter                                                      |
| GRADE  | Grading of Recommendations Assessment, Development and Evaluation |
| h      | Hour(s)                                                           |
| H      | High risk of bias                                                 |
| HAQ    | Health assessment questionnaire                                   |
| IL-1   | Interleukin-1                                                     |
| IPs    | Interphalangeal joints                                            |
| L      | Low risk of bias                                                  |
| mg     | Milligram                                                         |
| µg     | Microgram                                                         |
| min    | Minute(s)                                                         |
| ml     | Millilitre                                                        |
| Mo     | Month(s)                                                          |
| N      | Number                                                            |
| nm     | Nanometer                                                         |
| NR     | Not reported                                                      |

|       |                                      |
|-------|--------------------------------------|
| NRS   | Numerical rating scale               |
| NSAID | Non-steroidal anti-inflammatory drug |
| OA    | Osteoarthritis                       |
| RA    | Rheumatoid arthritis                 |
| RCT   | Randomised controlled trial          |
| RoB   | Risk of bias                         |
| Rx    | Radiography                          |
| TNF   | Tumour necrosis factor               |
| U     | Unclear risk of bias                 |
| VAS   | Visual analogue scale                |
| WA    | Wash-out period                      |
| w     | Week(s)                              |
| y     | Year(s)                              |

## 7. REFERENCE LIST

1. Kang TW, Lee JH, Park DH, Cynn HS. Effects of a finger exercise program on hand function in automobile workers with hand osteoarthritis: A randomized controlled trial. *Hand Surg Rehabil* 2019;38(1):59-66. doi: 10.1016/j.hansur.2018.09.007 [published Online First: 2018/11/08]
2. Leonard G, Paquet N, Guitard P, et al. The effects of an 8-week knitting program on osteoarthritis symptoms in elderly women: A pilot randomized controlled trial. *J Bodyw Mov Ther* 2021;27:410-19. doi: 10.1016/j.jbmt.2021.04.001 [published Online First: 2021/08/16]
3. Magni N, McNair P, Rice D. Six weeks of resistance training (plus advice) vs advice only in hand osteoarthritis: A single-blind, randomised, controlled feasibility trial. *Musculoskelet Sci Pract* 2022;57:102491. doi: 10.1016/j.msksp.2021.102491 [published Online First: 2021/12/07]
4. McVeigh KH, Kannas SN, Ivy CC, et al. Dynamic stabilization home exercise program for treatment of thumb carpometacarpal osteoarthritis: A prospective randomized control trial. *J Hand Ther* 2021 doi: 10.1016/j.jht.2021.06.002 [published Online First: 2021/07/28]
5. Pedersini P, Valdes K, Cantero-Tellez R, et al. Effects of Neurodynamic Mobilizations on Pain Hypersensitivity in Patients With Hand Osteoarthritis Compared to Robotic Assisted Mobilization: A Randomized Controlled Trial. *Arthritis Care Res (Hoboken)* 2021;73(2):232-39. doi: 10.1002/acr.24103 [published Online First: 2019/11/02]
6. Pisano K, Wolfe T, Lubahn J, Cooney T. Effect of a stabilization exercise program versus standard treatment for thumb carpometacarpal osteoarthritis: A randomized trial. *J Hand Ther* 2022 doi: 10.1016/j.jht.2022.03.009 [published Online First: 2022/07/11]
7. Cantero-Tellez R, Naughton N, Algar LA, et al. Proprioceptive Neuromuscular Facilitation Protocol for Thumb Osteoarthritis: A Pilot Study. *Hand (N Y)* 2023;18(2\_suppl):111s-18s. doi: 10.1177/1558944721990785 [published Online First: 20210506]
8. Cantero-Téllez R, Algar LA, Valdes KA, Naughton N. Clinical effects of proprioceptive thumb exercise for individuals with carpometacarpal joint osteoarthritis: A randomized controlled trial. *J Hand Ther* 2022a;35(3):358-66. doi: 10.1016/j.jht.2022.06.009 [published Online First: 2022/08/26]
9. Cantero-Tellez R, Perez-Cruzado D, Villafañe JH, et al. The Effect of Proprioception Training on Pain Intensity in Thumb Basal Joint Osteoarthritis: A Randomized Controlled Trial. *Int J Environ Res Public Health* 2022b;19:11. doi: <https://doi.org/10.3390/ijerph19063592>
10. Campos-Villegas C, Pérez-Alenda S, Carrasco JJ, et al. Effectiveness of proprioceptive neuromuscular facilitation therapy and strength training among post-menopausal women with thumb carpometacarpal osteoarthritis. A randomized trial. *J Hand Ther* 2022 doi: 10.1016/j.jht.2022.07.005 [published Online First: 2022/08/11]
11. Cruz-Gamero L, Tuljak AL, Garcia Orza S, et al. Effectiveness of proprioception training in functional recovery of thumb osteoarthritis. Single, multicenter, non-blind randomized clinical trial. *Reumatol Clin (Engl Ed)* 2023;19(8):417-22. doi: 10.1016/j.reumae.2023.05.002 [published Online First: 20230516]
12. Adams J, Barratt P, Rombach I, et al. The clinical and cost effectiveness of splints for thumb base osteoarthritis: a randomized controlled clinical trial. *Rheumatology (Oxford)* 2021;60(6):2862-77. doi: 10.1093/rheumatology/keaa726 [published Online First: 2020/12/01]
13. Can A, Tezel N. The effects of hand splinting in patients with early-stage thumb carpometacarpal joint osteoarthritis: a randomized, controlled study. *Turk J Med Sci* 2020;50(8):1857-64. doi: 10.3906/sag-1807-157 [published Online First: 2020/06/17]
14. Silva PG, de Carvalho Silva F, da Rocha Corrêa Fernandes A, Natour J. Effectiveness of Nighttime Orthoses in Controlling Pain for Women With Hand Osteoarthritis: A Randomized Controlled Trial. *Am J Occup Ther* 2020;74(3):7403205080p1-80p10. doi: 10.5014/ajot.2020.033621 [published Online First: 2020/05/05]

15. Cantero-Téllez R, Valdes K, Schwartz DA, et al. Necessity of Immobilizing the Metacarpophalangeal Joint in Carpometacarpal Osteoarthritis: Short-term Effect. *Hand (N Y)* 2018a;13(4):412-17. doi: 10.1177/1558944717708031 [published Online First: 2017/05/21]
16. Cantero-Téllez R, Villafañe JH, Valdes K, Berjano P. Effect of immobilization of metacarpophalangeal joint in thumb carpometacarpal osteoarthritis on pain and function. A quasi-experimental trial. *J Hand Ther* 2018b;31(1):68-73. doi: 10.1016/j.jht.2016.11.005 [published Online First: 2017/02/27]
17. Eyiis E, Mathijssen NMC, Kok P, et al. Three-dimensional printed customized versus conventional plaster brace for trapeziometacarpal osteoarthritis: a randomized controlled crossover trial. *J Hand Surg Eur Vol* 2023;48(5):412-18. doi: 10.1177/17531934221146864 [published Online First: 20230117]
18. Amaral DS, Duarte A, Barros SS, et al. Assistive devices: an effective strategy in non-pharmacological treatment for hand osteoarthritis-randomized clinical trial. *Rheumatol Int* 2018;38(3):343-51. doi: 10.1007/s00296-017-3892-1 [published Online First: 2017/12/01]
19. Farhadian M, Morovati Z, Shamsoddini A. Effect of Kinesio Taping on Pain, Range of Motion, Hand Strength, and Functional Abilities in Patients with Hand Osteoarthritis: A Pilot Randomized Clinical Trial. *Arch Bone Jt Surg* 2019;7(6):551-60. [published Online First: 2020/01/24]
20. Wade RG, Paxman CB, Tucker NC, Southern S. Kinesiology taping reduces the pain of finger osteoarthritis: a pilot single-blinded two-group parallel randomized trial. *J Pain Res* 2018;11:1281-88. doi: 10.2147/jpr.S153071 [published Online First: 2018/07/18]
21. Aksanyar B, Yilmaz H, Karaarslan F, et al. Comparison of the effectiveness of peloid and paraffin treatment for symptomatic hand osteoarthritis in women: a single-blind randomized controlled study. *Int J Biometeorol* 2022;66(9):1841-51. doi: 10.1007/s00484-022-02324-z [published Online First: 2022/07/07]
22. Benini C, Rubino G, Paolazzi G, et al. Efficacy of mud plus bath therapy as compared to bath therapy in osteoarthritis of hands and knees: a pilot single-blinded randomized controlled trial. *Reumatismo* 2021;73(3) doi: 10.4081/reumatismo.2021.1394 [published Online First: 2021/11/25]
23. De Azevedo F, Souza Filho A, Nunes R, et al. Paraffin bath reduces pain in patients with hand osteoarthritis EULAR 2023. Milan, Italy: Ann Rheum Dis, 2023:1817.
24. Kasapoğlu Aksoy M, Altan L. Short-term efficacy of paraffin therapy and home-based exercise programs in the treatment of symptomatic hand osteoarthritis. *Turk J Phys Med Rehabil* 2018;64(2):108-13. doi: 10.5606/tftrd.2018.1535 [published Online First: 2017/10/02]
25. Savaş BB, Alparslan GB, Korkmaz C. Effect of flaxseed poultice compress application on pain and hand functions of patients with hand osteoarthritis. *Clin Rheumatol* 2019;38(7):1961-69. doi: 10.1007/s10067-019-04484-7 [published Online First: 2019/02/27]
26. Ustun I, Çağlar S. Comparison of the effect of prolotherapy and paraffin wax for hand osteoarthritis. *Eur Rev Med Pharmacol Sci* 2023;27(20):9510-20. doi: 10.26355/eurev\_202310\_34124
27. Öncel A, Küçükşen S, Ecesoy H, et al. Comparison of efficacy of fluidotherapy and paraffin bath in hand osteoarthritis: A randomized controlled trial. *Arch Rheumatol* 2021;36(2):201-09. doi: 10.46497/ArchRheumatol.2021.8123 [published Online First: 2021/09/17]
28. Cantero-Téllez R, Villafañe JH, Valdes K, et al. Effects of High-Intensity Laser Therapy on Pain Sensitivity and Motor Performance in Patients with Thumb Carpometacarpal Joint Osteoarthritis: A Randomized Controlled Trial. *Pain Med* 2020;21(10):2357-65. doi: 10.1093/pm/pnz297 [published Online First: 2019/12/07]
29. Minten MJM, Leseman-Hoogenboom MM, Kloppenburg M, et al. Lack of beneficial effects of low-dose radiation therapy on hand osteoarthritis symptoms and inflammation: a randomised, blinded, sham-controlled trial. *Osteoarthritis Cartilage* 2018;26(10):1283-90. doi: 10.1016/j.joca.2018.06.010 [published Online First: 2018/09/21]

30. van den Ende C, Minten M, Leseman-Hoogenboom M, et al. Long-term efficacy of low-dose radiation therapy on symptoms in patients with knee and hand osteoarthritis: follow-up results of two parallel randomised, sham-controlled trials. *Lancet Rheumatol* 2020;2:8.
31. Jamison RN, Mei A, Edwards RR, Ross EL. Efficacy of Vibrating Gloves for Chronic Hand Pain due to Osteoarthritis. *Pain Med* 2018;19(5):1044-57. doi: 10.1093/pm/pnx230 [published Online First: 2017/10/13]
32. Barnard A, Jansen V, Swindells MG, et al. A randomized controlled trial of real versus sham acupuncture for basal thumb joint arthritis. *J Hand Surg Eur Vol* 2020;45(5):488-94. doi: 10.1177/1753193420911326 [published Online First: 2020/03/28]
33. Rodríguez Sánchez-Laulhé P, Biscarri-Carbonero Á, Suero-Pineda A, et al. The effects of a mobile app-delivered intervention in people with symptomatic hand osteoarthritis: a pragmatic randomized controlled trial. *Eur J Phys Rehabil Med* 2023;59(1):54-64. doi: 10.23736/s1973-9087.22.07744-9 [published Online First: 20230112]
34. Stoffer-Marx MA, Klinger M, Luschin S, et al. Functional consultation and exercises improve grip strength in osteoarthritis of the hand - a randomised controlled trial. *Arthritis Res Ther* 2018;20(1):253. doi: 10.1186/s13075-018-1747-0 [published Online First: 2018/11/11]
35. Tveter AT, Østerås N, Nossum R, et al. Short-Term Effects of Occupational Therapy on Hand Function and Pain in Patients With Carpometacarpal Osteoarthritis: Secondary Analyses From a Randomized Controlled Trial. *Arthritis Care Res (Hoboken)* 2022;74(6):955-64. doi: 10.1002/acr.24543 [published Online First: 2020/12/19]
36. Kim HI, Chon SJ, Seon KE, et al. Clinical Effects of Korean Red Ginseng in Postmenopausal Women With Hand Osteoarthritis: A Double-Blind, Randomized Controlled Trial. *Front Pharmacol* 2021;12:745568. doi: 10.3389/fphar.2021.745568 [published Online First: 2021/12/04]
37. Liu X, Robbins S, Eyles J, et al. Efficacy and safety of a supplement combination on hand pain among people with symptomatic hand osteoarthritis: an internet-based, randomised clinical trial the RADIANT study. *Osteoarthritis Cartilage* 2021;29(5):667-77. doi: 10.1016/j.joca.2021.01.011 [published Online First: 2021/02/23]
38. Basford JR, Sheffield CG, Mair SD, Ilstrup DM. Low-energy helium neon laser treatment of thumb osteoarthritis. *Arch Phys Med Rehabil* 1987;68(11):794-7.
39. Wang Y, Estee MM, Gan D, et al. Effect of 6-week treatment with topical betamethasone dipropionate in patients with symptomatic hand osteoarthritis: A randomized double-blind, placebo-controlled trial. *Osteoarthritis Cartilage* 2023a;5(3):100382. doi: 10.1016/j.joca.2023.100382 [published Online First: 20230616]
40. Kroon FPB, Kortekaas MC, Boonen A, et al. Results of a 6-week treatment with 10 mg prednisolone in patients with hand osteoarthritis (HOPE): a double-blind, randomised, placebo-controlled trial. *Lancet* 2019;394(10213):1993-2001. doi: 10.1016/s0140-6736(19)32489-4 [published Online First: 20191111]
41. Wang PH, Wu CH, Ma CH, et al. Comparison of intra-articular injection of ArtiAid®-Mini with Ostenil®-Mini for trapeziometacarpal osteoarthritis: A double-blind, prospective, randomized, non-inferiority trial. *Jt Dis Relat Surg* 2023;34(1):50-57. doi: 10.52312/jdrs.2023.876 [published Online First: 20230106]
42. Kloppenburg M, Peterfy C, Haugen IK, et al. Phase IIa, placebo-controlled, randomised study of lutikizumab, an anti-interleukin-1 $\alpha$  and anti-interleukin-1 $\beta$  dual variable domain immunoglobulin, in patients with erosive hand osteoarthritis. *Ann Rheum Dis* 2019;78(3):413-20. doi: 10.1136/annrheumdis-2018-213336 [published Online First: 2018/12/16]
43. Richette P, Latourte A, Sellam J, et al. Efficacy of tocilizumab in patients with hand osteoarthritis: double blind, randomised, placebo-controlled, multicentre trial. *Ann Rheum Dis* 2020 doi: 10.1136/annrheumdis-2020-218547 [published Online First: 2020/10/16]
44. Schett G, Bainbridge C, Berkowitz M, et al. Anti-granulocyte-macrophage colony-stimulating factor antibody otilimab in patients with hand osteoarthritis: a phase 2a randomised trial. *Lancet Rheumatol* 2020;2:10.

45. Kedor C, Detert J, Rau R, et al. Hydroxychloroquine in patients with inflammatory and erosive osteoarthritis of the hands: results of the OA-TREAT study-a randomised, double-blind, placebo-controlled, multicentre, investigator-initiated trial. *RMD Open* 2021;7(2) doi: 10.1136/rmdopen-2021-001660 [published Online First: 2021/07/04]
46. Ferrero S, Wittoek R, Allado E, et al. Methotrexate treatment in hand osteoarthritis refractory to usual treatments: A randomised, double-blind, placebo-controlled trial. *Semin Arthritis Rheum* 2021;51(4):831-38. doi: 10.1016/j.semarthrit.2021.04.016 [published Online First: 2021/06/23]
47. Wang Y, Jones G, Keen HI, et al. Methotrexate to treat hand osteoarthritis with synovitis (METHODS): an Australian, multisite, parallel-group, double-blind, randomised, placebo-controlled trial. *Lancet* 2023b;402(10414):1764-72. doi: 10.1016/s0140-6736(23)01572-6 [published Online First: 20231012]
48. Abdelsabor Sabaah HM, El Fattah RA, Al Zifzaf D, Saad H. A Comparative Study for Different Types of Thumb Base Osteoarthritis Injections: A Randomized Controlled Interventional Study. *Ortop Traumatol Rehabil* 2020;22(6):447-54. doi: 10.5604/01.3001.0014.6055 [published Online First: 2021/01/29]
49. Malahias MA, Roumeliotis L, Nikolaou VS, et al. Platelet-Rich Plasma versus Corticosteroid Intra-Articular Injections for the Treatment of Trapezometacarpal Arthritis: A Prospective Randomized Controlled Clinical Trial. *Cartilage* 2021;12(1):51-61. doi: 10.1177/1947603518805230 [published Online First: 2018/10/23]
50. Winter R, Tuca AC, Justich I, et al. Minimally Invasive Treatment of Trapezometacarpal Osteoarthritis: Results of a Blinded Randomized Controlled Trial. *Plast Reconstr Surg* 2023;152(6):1277-85. doi: 10.1097/prs.00000000000010516 [published Online First: 20230411]
51. Davis CR, Ruediger CD, Dyer KA, et al. Colchicine is not effective for reducing osteoarthritic hand pain compared to placebo: a randomised, placebo-controlled trial (COLAH). *Osteoarthritis Cartilage* 2021;29(2):208-14. doi: 10.1016/j.joca.2020.11.002 [published Online First: 2020/11/25]
52. Døssing A, Henriksen M, Ellegaard K, et al. Colchicine twice daily for hand osteoarthritis: Results from the double-blind, randomised, placebo-controlled Color trial EULAR 2023. Milan, Italy: *Ann Rheum Dis*, 2023:50.
53. Williams JAE, Chester-Jones M, Minns Lowe C, et al. Hormone replacement therapy (conjugated oestrogens plus bazedoxifene) for post-menopausal women with symptomatic hand osteoarthritis: primary report from the HOPE-e randomised, placebo-controlled, feasibility study. *Lancet Rheumatol* 2022;4(10):e725-e37. doi: 10.1016/s2665-9913(22)00218-1 [published Online First: 2022/11/08]
54. Devez LA, Robbins SR, Duong V, et al. Efficacy of a Combination of Conservative Therapies vs an Education Comparator on Clinical Outcomes in Thumb Base Osteoarthritis: A Randomized Clinical Trial. *JAMA Intern Med* 2021;181(4):429-38. doi: 10.1001/jamainternmed.2020.7101 [published Online First: 2021/03/09]
55. Ioppolo F, Saracino F, Rizzo RS, et al. Comparison Between Extracorporeal Shock Wave Therapy and Intra-articular Hyaluronic Acid Injections in the Treatment of First Carpometacarpal Joint Osteoarthritis. *Ann Rehabil Med* 2018;42(1):92-100. doi: 10.5535/arm.2018.42.1.92 [published Online First: 2018/03/22]
56. Metin Ökmen B, Ökmen K, Altan L. Effectiveness of Superficial Radial Nerve Block on Pain, Function and Quality of Life in Patients With Hand Osteoarthritis: A Prospective, Randomized and Controlled Single-Blind Study. *Arch Rheumatol* 2018;33(4):464-72. doi: 10.5606/ArchRheumatol.2018.6754 [published Online First: 2019/03/16]
57. Nguyen C, Abdoul H, Campagna R, et al. Intra-articular botulinum toxin A for base-of-thumb osteoarthritis: a double-blind, randomised, controlled, phase 3 trial (RHIBOT). *Lancet Rheumatol* 2022;4:10.



58. de Jong TR, Bonhof-Jansen E, Brink SM, et al. Total joint arthroplasty versus trapeziectomy in the treatment of trapeziometacarpal joint arthritis: a randomized controlled trial. *J Hand Surg Eur Vol* 2023;48(9):884-94. doi: 10.1177/17531934231185245 [published Online First: 20230717]
59. Guzzini M, Arioli L, Annibaldi A, et al. Interposition Arthroplasty versus Dual Cup Mobility Prosthesis in Treatment of Trapeziometacarpal Joint Osteoarthritis: A Prospective Randomized Study. *Hand (N Y)* 2023;15589447231185584. doi: 10.1177/15589447231185584 [published Online First: 20230723]
60. Klim SM, Glehr R, Graef A, et al. Total joint arthroplasty versus resection-interposition arthroplasty for thumb carpometacarpal arthritis: a randomized controlled trial. *Acta Orthop* 2023;94:224-29. doi: 10.2340/17453674.2023.11919 [published Online First: 20230503]
61. Thorkildsen RD, Røkkum M. Trapeziectomy with LRTI or joint replacement for CMC1 arthritis, a randomised controlled trial. *J Plast Surg Hand Surg* 2019;53(6):361-69. doi: 10.1080/2000656x.2019.1635490 [published Online First: 2019/07/05]
62. Brennan A, Blackburn J, Thomson J, Field J. Simple trapeziectomy versus trapeziectomy with flexor carpi radialis suspension: a 17-year follow-up of a randomized blind trial. *J Hand Surg Eur Vol* 2021;46(2):120-24. doi: 10.1177/1753193420952966 [published Online First: 2020/09/10]
63. Marks M, Hensler S, Wehrli M, et al. Trapeziectomy With Suspension-Interposition Arthroplasty for Thumb Carpometacarpal Osteoarthritis: A Randomized Controlled Trial Comparing the Use of Allograft Versus Flexor Carpi Radialis Tendon. *J Hand Surg Am* 2017;42(12):978-86. doi: 10.1016/j.jhsa.2017.07.023 [published Online First: 2017/09/14]
64. Morais B, Botelho T, Marques N, et al. Trapeziectomy with suture-button suspensionplasty versus ligament reconstruction and tendon interposition: a randomized controlled trial. *Hand Surg Rehabil* 2022;41(1):59-64. doi: 10.1016/j.hansur.2021.10.315 [published Online First: 2021/11/04]
65. Sánchez-Flò R, Fillat-Gomà F, Marcano-Fernández FA, et al. Partial Versus Total Trapeziectomy With Interposition Arthroplasty for Trapeziometacarpal Osteoarthritis Grade II to III Eaton-Littler: A Clinical Trial. *J Hand Surg Glob Online* 2020;2(3):133-37. doi: 10.1016/j.jhsg.2020.03.004 [published Online First: 2020/04/15]
66. van Laarhoven C, Baas M, Qi H, et al. Arthroscopic versus Open Distal Hemitrapeziectomy without Interposition: 2-Year Results of a Randomized Controlled Trial. *Plast Reconstr Surg* 2023;151(3):592-601. doi: 10.1097/prs.0000000000009920 [published Online First: 20221122]
67. Zarezadeh A, Dehghani M, Shahruzian A. Ligament reconstruction and tendon interposition in comparison with hematoma distraction arthroplasty for the treatment of arthritis in the trapeziometacarpal joint. *Int J Burns Trauma* 2021;11(4):296-303. [published Online First: 2021/09/25]
68. Hennig T, Haehre L, Hornburg VT, et al. Effect of home-based hand exercises in women with hand osteoarthritis: a randomised controlled trial. *Ann Rheum Dis* 2015;74(8):1501-8. doi: 10.1136/annrheumdis-2013-204808 [published Online First: 2014/03/29]
69. Lefler C, Armstrong W. Exercise in the treatment of osteoarthritis in the hands of elderly. *Clinical Kinesiology* 2004;58(2):13-7.
70. Nery M, Natour J, Jennings F, et al. Effects of a progressive resistance exercise program in patients with hand osteoarthritis: A randomized, controlled trial with a blinded assessor. *Clin Rehabil* 2021;35(12):1757-67. doi: 10.1177/02692155211030622 [published Online First: 2021/07/10]
71. Paolillo AR, Paolillo FR, João JP, et al. Synergic effects of ultrasound and laser on the pain relief in women with hand osteoarthritis. *Lasers Med Sci* 2015;30(1):279-86. doi: 10.1007/s10103-014-1659-4 [published Online First: 20140920]



72. Østerås N, Hagen KB, Grotle M, et al. Limited effects of exercises in people with hand osteoarthritis: results from a randomized controlled trial. *Osteoarthritis Cartilage* 2014;22(9):1224-33. doi: 10.1016/j.joca.2014.06.036 [published Online First: 20140705]
73. Adams J, Boucas S, Hislop K, et al. The effectiveness and efficacy of splints for thumb base osteoarthritis : A Pilot Randomized Controlled Trial. *Rheumatology*, 2014:2.
74. Arazpour M, Soflaei M, Ahmadi Bani M, et al. The effect of thumb splinting on thenar muscles atrophy, pain, and function in subjects with thumb carpometacarpal joint osteoarthritis. *Prosthet Orthot Int* 2017;41(4):379-86. doi: 10.1177/0309364616664149 [published Online First: 20160919]
75. Gomes Carreira AC, Jones A, Natour J. Assessment of the effectiveness of a functional splint for osteoarthritis of the trapeziometacarpal joint on the dominant hand: a randomized controlled study. *J Rehabil Med* 2010;42(5):469-74. doi: 10.2340/16501977-0542
76. Hermann M, Nilsen T, Eriksen CS, et al. Effects of a soft prefabricated thumb orthosis in carpometacarpal osteoarthritis. *Scand J Occup Ther* 2014;21(1):31-9. doi: 10.3109/11038128.2013.851735 [published Online First: 2013/11/13]
77. Rannou F, Dimet J, Boutron I, et al. Splint for base-of-thumb osteoarthritis: a randomized trial. *Ann Intern Med* 2009;150(10):661-9. [published Online First: 2009/05/20]
78. Bani MA, Arazpour M, Kashani RV, et al. Comparison of custom-made and prefabricated neoprene splinting in patients with the first carpometacarpal joint osteoarthritis. *Disabil Rehabil Assist Technol* 2013;8(3):232-7. doi: 10.3109/17483107.2012.699992 [published Online First: 20120717]
79. Vegt AE, Grond R, Gröschke JS, et al. The effect of two different orthoses on pain, hand function, patient satisfaction and preference in patients with thumb carpometacarpal osteoarthritis: a multicentre, crossover, randomised controlled trial. *Bone Joint J* 2017;99-b(2):237-44. doi: 10.1302/0301-620x.99b2.37684
80. Weiss S, LaStayo P, Mills A, Bramlet D. Prospective analysis of splinting the first carpometacarpal joint: an objective, subjective, and radiographic assessment. *J Hand Ther* 2000;13(3):218-26. [published Online First: 2000/08/31]
81. Weiss S, Lastayo P, Mills A, Bramlet D. Splinting the degenerative basal joint: custom-made or prefabricated neoprene? *J Hand Ther* 2004;17(4):401-6. [published Online First: 2004/11/13]
82. Kjekken I, Darre S, Smedslund G, et al. Effect of assistive technology in hand osteoarthritis: a randomised controlled trial. *Ann Rheum Dis* 2011;70(8):1447-52. doi: 10.1136/ard.2010.148668 [published Online First: 2011/05/17]
83. Dilek B, Gozum M, Sahin E, et al. Efficacy of paraffin bath therapy in hand osteoarthritis: a single-blinded randomized controlled trial. *Arch Phys Med Rehabil* 2013;94(4):642-9. doi: 10.1016/j.apmr.2012.11.024 [published Online First: 2012/11/29]
84. Fioravanti A, Tenti S, Giannitti C, et al. Short- and long-term effects of mud-bath treatment on hand osteoarthritis: a randomized clinical trial. *Int J Biometeorol* 2014;58(1):79-86. doi: 10.1007/s00484-012-0627-6 [published Online First: 20130114]
85. Horváth K, Kulisch Á, Németh A, Bender T. Evaluation of the effect of balneotherapy in patients with osteoarthritis of the hands: a randomized controlled single-blind follow-up study. *Clin Rehabil* 2012;26(5):431-41. doi: 10.1177/0269215511425961 [published Online First: 20111201]
86. Kasapoğlu Aksoy M, Altan L, Eröksüz R, Metin Ökmen B. The efficacy of peloid therapy in management of hand osteoarthritis: a pilot study. *Int J Biometeorol* 2017;61(12):2145-52. doi: 10.1007/s00484-017-1419-9 [published Online First: 2017/08/06]
87. Kovács C, Pecze M, Tihanyi Á, et al. The effect of sulphurous water in patients with osteoarthritis of hand. Double-blind, randomized, controlled follow-up study. *Clin Rheumatol* 2012;31(10):1437-42. doi: 10.1007/s10067-012-2026-0 [published Online First: 20120729]
88. Brosseau L, Wells G, Marchand S, et al. Randomized controlled trial on low level laser therapy (LLLT) in the treatment of osteoarthritis (OA) of the hand. *Lasers Surg Med* 2005;36(3):210-9. doi: 10.1002/lsm.20137

89. Stukstette MJ, Dekker J, den Broeder AA, et al. No evidence for the effectiveness of a multidisciplinary group based treatment program in patients with osteoarthritis of hands on the short term; results of a randomized controlled trial. *Osteoarthritis Cartilage* 2013;21(7):901-10. doi: 10.1016/j.joca.2013.03.016 [published Online First: 2013/04/16]
90. Villafane JH, Silva GB, Bishop MD, Fernandez-Carnero J. Radial nerve mobilization decreases pain sensitivity and improves motor performance in patients with thumb carpometacarpal osteoarthritis: a randomized controlled trial. *Arch Phys Med Rehabil* 2012;93(3):396-403. doi: 10.1016/j.apmr.2011.08.045 [published Online First: 2012/01/06]
91. Altman RD, Dreiser RL, Fisher CL, et al. Diclofenac sodium gel in patients with primary hand osteoarthritis: a randomized, double-blind, placebo-controlled trial. *J Rheumatol* 2009;36(9):1991-9. doi: 10.3899/jrheum.081316 [published Online First: 20090731]
92. Romero-Cerecero O, Meckes-Fischer M, Zamilpa A, et al. Clinical trial for evaluating the effectiveness and tolerability of topical *Sphaeralcea angustifolia* treatment in hand osteoarthritis. *J Ethnopharmacol* 2013;147(2):467-73. doi: 10.1016/j.jep.2013.03.040 [published Online First: 20130323]
93. Widrig R, Suter A, Saller R, Melzer J. Choosing between NSAID and arnica for topical treatment of hand osteoarthritis in a randomised, double-blind study. *Rheumatol Int* 2007;27(6):585-91. doi: 10.1007/s00296-007-0304-y [published Online First: 20070222]
94. Dreiser RL, Gersberg M, Thomas F, Courcier S. [Ibuprofen 800 mg in the treatment of arthrosis of the fingers or rhizarthrosis]. *Rev Rhum Ed Fr* 1993;60(11):836-41.
95. Grifka JK, Zacher J, Brown JP, et al. Efficacy and tolerability of lumiracoxib versus placebo in patients with osteoarthritis of the hand. *Clin Exp Rheumatol* 2004;22(5):589-96.
96. Seiler V. Meclofenamate sodium in the treatment of degenerative joint disease of the hand (Heberden nodes). *Arzneimittelforschung* 1983;33(4a):656-9.
97. Kvien TK, Fjeld E, Slatkowsky-Christensen B, et al. Efficacy and safety of a novel synergistic drug candidate, CRx-102, in hand osteoarthritis. *Ann Rheum Dis* 2008;67(7):942-8. doi: 10.1136/ard.2007.074401 [published Online First: 20071025]
98. Wenham CY, Hensor EM, Grainger AJ, et al. A randomized, double-blind, placebo-controlled trial of low-dose oral prednisolone for treating painful hand osteoarthritis. *Rheumatology (Oxford)* 2012;51(12):2286-94. doi: 10.1093/rheumatology/kes219 [published Online First: 20120906]
99. Heyworth BE, Lee JH, Kim PD, et al. Hylan versus corticosteroid versus placebo for treatment of basal joint arthritis: a prospective, randomized, double-blinded clinical trial. *J Hand Surg Am* 2008;33(1):40-8. doi: 10.1016/j.jhsa.2007.10.009
100. Mandl LA, Wolffe S, Daluski A, et al. A randomized controlled trial of hylan G-F 20 for the treatment of carpometacarpal osteoarthritis. *Arthritis Rheum* 2012;64:2.
101. Meenagh GK, Patton J, Kynes C, Wright GD. A randomised controlled trial of intra-articular corticosteroid injection of the carpometacarpal joint of the thumb in osteoarthritis. *Ann Rheum Dis* 2004;63(10):1260-3. doi: 10.1136/ard.2003.015438
102. Aitken D, Laslett LL, Pan F, et al. A randomised double-blind placebo-controlled crossover trial of HUMira (adalimumab) for erosive hand Osteoarthritis - the HUMOR trial. *Osteoarthritis Cartilage* 2018;26(7):880-87. doi: 10.1016/j.joca.2018.02.899 [published Online First: 2018/03/03]
103. Chevalier X, Ravaud P, Maheu E, et al. Adalimumab in patients with hand osteoarthritis refractory to analgesics and NSAIDs: a randomised, multicentre, double-blind, placebo-controlled trial. *Ann Rheum Dis* 2015;74(9):1697-705. doi: 10.1136/annrheumdis-2014-205348 [published Online First: 20140509]
104. Kloppenburg M, Ramonda R, Bobacz K, et al. Etanercept in patients with inflammatory hand osteoarthritis (EHOA): a multicentre, randomised, double-blind, placebo-controlled trial. *Ann Rheum Dis* 2018;77(12):1757-64. doi: 10.1136/annrheumdis-2018-213202 [published Online First: 2018/10/05]

105. Verbruggen G, Wittoek R, Vander Cruyssen B, Elewaut D. Tumour necrosis factor blockade for the treatment of erosive osteoarthritis of the interphalangeal finger joints: a double blind, randomised trial on structure modification. *Ann Rheum Dis* 2012;71(6):891-8. doi: 10.1136/ard.2011.149849 [published Online First: 20111129]
106. Kingsbury SR, Tharmanathan P, Keding A, et al. Hydroxychloroquine Effectiveness in Reducing Symptoms of Hand Osteoarthritis: A Randomized Trial. *Ann Intern Med* 2018;168(6):385-95. doi: 10.7326/m17-1430 [published Online First: 2018/02/21]
107. Lee W, Ruijgrok L, Boxma-de Klerk B, et al. Efficacy of Hydroxychloroquine in Hand Osteoarthritis: A Randomized, Double-Blind, Placebo-Controlled Trial. *Arthritis Care Res (Hoboken)* 2018;70(9):1320-25. doi: 10.1002/acr.23471 [published Online First: 2017/11/11]
